# Supplementary material for: Common gardens in teosintes reveal the establishment of a syndrome of adaptation to altitude
Source: PLoS Genet. 2019 Dec 20;15(12):e1008512. doi: 10.1371/journal.pgen.1008512 (PMC6944379; doi:10.1371/journal.pgen.1008512)
Supplement: S2 Data — (XLSX) [file pgen.1008512.s022.xlsx]

## Sheet: Data_S2
Data_S2: Genotyping of 38 microsatellites on the association panel.
Columns include PlantID, Population, and genotyping data. For each microsatellite, there are two columns indicating length of the two alleles. The last column (AM) indicates which individuals were used for the association mapping analysis (phenotypic and candidate SNP data available).
PlantID	Population	phi227562	phi227562	phi308707	phi308707	phi102228	phi102228	phi448880	phi448880	phi308090	phi308090	phi109188	phi109188	umc1496	umc1496	umc1133	umc1133	dupssr34	dupssr34	phi002	phi002	phi029	phi029	phi032	phi032	phi034	phi034	phi065	phi065	phi115	phi115	phi014	phi014	phi024	phi024	phi033	phi033	phi046	phi046	phi051	phi051	phi053	phi053	phi402893	phi402893	phi059	phi059	phi062	phi062
S13_P9b_1_3	P9b	308	321	131	131	121	121	183	183	217	220	159	167	NA	NA	80	80	NA	NA	69	69	159	172	NA	NA	121	142	129	129	290	302	157	157	165	165	245	245	61	61	138	138	167	189	214	219	150	150	132	142
S13_P9b_13_2	P9b	308	318	128	131	121	129	183	186	NA	NA	155	159	NA	NA	80	82	217	217	78	78	152	172	236	236	142	142	129	129	290	290	163	171	165	165	249	254	61	64	NA	NA	189	192	214	219	155	157	132	135
S13_P9b_18_1	P9b	315	315	131	131	121	121	186	186	217	217	155	155	141	141	82	97	173	196	69	69	159	159	236	236	142	142	129	129	290	290	157	157	174	174	243	243	61	61	137	137	173	173	231	231	NA	NA	132	132
S13_P9b_18_3	P9b	315	321	128	128	125	125	186	186	217	220	155	159	134	141	80	82	214	214	69	69	152	159	236	236	142	142	129	129	290	302	NA	NA	168	174	243	245	61	61	137	137	171	189	214	231	NA	NA	132	135
S13_P9b_19_4	P9b	318	321	131	131	121	121	186	186	217	220	159	159	146	146	78	82	214	214	69	69	166	172	236	236	121	121	129	129	290	302	157	157	174	174	246	251	61	61	140	140	171	210	NA	NA	NA	NA	NA	NA
S13_P9b_24B_4	P9b	315	315	116	131	121	121	183	183	220	223	167	167	134	146	97	101	170	196	69	69	166	172	NA	NA	142	142	129	150	302	302	160	171	162	174	246	251	61	61	137	137	173	210	NA	NA	155	158	132	135
S13_P9b_28B_3	P9b	315	321	111	119	125	125	171	183	NA	NA	146	146	129	134	87	87	196	196	69	69	NA	NA	235	238	NA	NA	129	139	302	302	163	163	165	168	251	265	61	64	140	140	167	189	217	226	150	155	NA	NA
S13_M7b_1_1	M7b	315	315	116	128	121	125	174	186	217	217	146	146	NA	NA	87	97	196	196	69	69	152	152	238	238	139	142	129	129	302	302	151	163	168	171	243	246	61	61	142	142	167	189	214	219	NA	NA	122	135
S13_M7b_11A_3	M7b	321	324	116	116	125	125	183	186	217	217	151	151	NA	NA	86	95	196	223	69	69	NA	NA	238	238	139	152	129	129	302	302	163	166	165	165	243	243	61	64	138	138	167	174	NA	NA	NA	NA	NA	NA
S13_M7b_12_3	M7b	315	315	128	128	121	125	171	174	217	217	155	155	131	137	NA	NA	196	196	69	69	152	172	238	238	139	142	129	145	290	302	163	163	165	165	237	243	61	64	142	142	167	167	NA	NA	145	155	135	138
S13_M7b_19_1	M7b	312	312	128	131	121	125	174	183	212	217	167	171	NA	NA	86	93	211	219	69	69	NA	NA	NA	NA	138	139	129	129	290	302	163	163	165	165	234	243	61	61	138	142	185	192	214	217	155	155	135	135
S13_M7b_2_2	M7b	315	321	128	128	125	125	174	186	217	217	146	146	NA	NA	86	86	196	223	69	69	NA	NA	238	238	142	146	129	129	302	302	163	166	168	168	NA	NA	61	64	142	142	171	171	219	219	NA	NA	128	135
S13_M7b_26_1	M7b	315	324	125	125	125	125	183	186	217	217	146	167	137	137	86	97	196	214	69	69	152	152	238	238	142	142	129	129	302	302	163	163	NA	NA	243	243	61	61	137	140	185	185	NA	NA	NA	NA	135	135
S13_M7b_6_1	M7b	321	324	128	131	125	125	174	186	212	217	151	171	136	136	NA	NA	211	211	69	69	172	182	NA	NA	136	136	129	129	302	302	163	171	168	168	243	246	61	61	137	140	167	185	214	219	155	157	NA	NA
S13_M7b_7_2	M7b	321	321	125	128	125	125	183	186	217	217	146	151	131	144	86	86	213	219	69	69	182	182	232	238	136	138	129	129	302	302	163	171	165	165	243	251	61	73	140	142	185	185	NA	NA	155	155	132	135
S13_P1a_18_1	P1a	308	315	128	131	121	129	183	183	220	220	159	159	129	129	87	87	214	217	NA	NA	152	152	237	237	136	149	129	129	302	302	163	163	174	174	255	255	61	61	137	137	171	189	219	219	NA	NA	122	135
S13_P1a_25_1	P1a	312	321	128	131	121	125	183	186	220	220	159	159	129	143	87	87	214	214	NA	NA	NA	NA	240	240	136	136	129	129	302	302	163	163	174	174	255	255	NA	NA	137	137	189	189	219	219	NA	NA	128	128
S13_P1a_27_2	P1a	308	321	128	131	121	125	186	186	NA	NA	155	159	NA	NA	87	87	214	214	NA	NA	NA	NA	240	240	136	136	129	129	302	302	157	157	174	174	255	255	NA	NA	137	137	167	189	NA	NA	NA	NA	NA	NA
S13_P1a_27A_1	P1a	308	312	128	131	121	129	183	183	220	220	155	159	NA	NA	87	87	214	214	NA	NA	152	152	240	240	136	136	129	150	302	302	157	157	174	174	252	255	61	61	137	137	189	189	NA	NA	158	170	122	128
S13_P1a_4_3	P1a	312	321	131	131	121	125	183	183	220	220	159	159	NA	NA	87	87	214	214	69	73	152	152	240	240	136	139	129	150	302	302	157	163	174	174	255	255	61	61	137	137	167	189	219	219	NA	NA	122	122
S13_P1a_5_1	P1a	321	321	119	131	121	129	183	186	220	220	155	159	NA	NA	87	87	214	214	NA	NA	152	152	240	240	136	136	129	150	302	302	157	163	174	174	255	255	NA	NA	137	137	189	189	NA	NA	156	156	NA	NA
S13_P1a_5_3	P1a	321	321	NA	NA	121	129	183	183	220	220	159	159	129	129	87	87	214	214	NA	NA	152	152	240	240	136	136	129	129	302	302	157	163	174	174	255	255	61	61	137	137	189	189	219	228	NA	NA	122	142
S13_P9a_10_4	P9a	315	315	128	131	121	121	186	186	215	220	163	163	146	146	83	83	159	215	69	69	159	159	236	239	139	142	129	129	290	302	157	163	171	171	249	249	61	64	140	140	192	192	NA	NA	NA	NA	122	132
S13_P9a_38_3	P9a	315	315	128	131	121	129	183	183	197	220	147	163	136	140	83	87	153	159	69	73	137	150	238	238	121	121	129	129	290	302	157	163	159	165	240	249	61	61	137	137	188	192	NA	NA	155	155	122	142
S13_P9a_3C_3	P9a	321	321	128	128	129	129	183	183	197	220	146	163	NA	NA	87	87	153	218	69	69	150	150	NA	NA	139	142	129	129	302	302	163	163	165	171	240	252	NA	NA	140	140	167	167	222	226	155	158	122	142
S13_P9a_42_1	P9a	312	321	128	131	121	129	180	183	217	217	163	167	NA	NA	83	83	159	214	69	73	150	150	238	238	139	142	129	129	290	302	163	163	165	165	249	249	61	61	NA	NA	NA	NA	NA	NA	145	155	NA	NA
S13_P9a_6_4	P9a	315	318	122	128	129	129	177	183	215	220	155	155	141	146	83	97	159	218	69	73	150	159	238	238	121	142	129	129	290	302	163	163	165	171	240	249	NA	NA	138	140	188	188	214	214	155	158	NA	NA
S13_P9a_9_3	P9a	308	321	128	131	121	129	NA	NA	217	217	155	155	NA	NA	87	87	162	214	69	73	NA	NA	237	237	121	139	129	129	NA	NA	NA	NA	159	165	240	249	NA	NA	137	140	167	167	214	231	155	158	NA	NA
S13_M6a_10_1	M6a	321	321	111	128	125	129	171	171	NA	NA	159	170	129	129	87	87	217	219	69	69	145	150	NA	NA	142	146	129	129	302	302	NA	NA	165	168	243	243	NA	NA	137	137	167	189	NA	NA	NA	NA	122	135
S13_M6a_10A_3	M6a	321	321	111	125	121	125	171	171	NA	NA	159	167	129	129	87	97	196	196	69	69	145	150	235	235	121	136	129	139	302	302	163	163	159	168	255	255	61	64	137	139	189	192	NA	NA	155	158	132	135
S13_M6a_11_3	M6a	321	321	111	119	125	125	171	183	197	197	146	146	NA	NA	87	87	217	217	69	69	168	168	235	235	142	146	129	129	290	302	163	163	165	168	249	255	61	64	138	138	167	167	217	217	150	155	132	132
S13_M6a_12_1	M6a	321	321	122	128	125	125	183	186	NA	NA	146	146	134	134	87	93	196	196	52	69	NA	NA	235	235	146	146	129	129	302	302	163	163	168	168	255	265	64	64	140	140	192	192	214	214	NA	NA	132	132
S13_M6a_3B_1	M6a	315	321	125	125	125	125	171	183	220	220	146	146	137	137	87	97	196	196	69	69	152	152	238	238	121	121	129	129	302	302	NA	NA	165	165	249	249	61	64	140	140	167	194	214	219	NA	NA	132	135
S13_M6a_5_4	M6a	321	321	111	111	121	125	171	177	220	220	146	146	134	137	87	87	196	196	69	69	145	150	232	242	142	142	129	139	302	302	163	163	159	168	245	265	64	64	140	140	189	192	219	226	155	158	132	132
S13_M6a_6_1	M6a	321	321	111	111	125	125	183	183	220	220	159	159	NA	NA	87	87	196	196	69	69	NA	NA	NA	NA	142	142	129	129	302	302	163	163	NA	NA	255	255	61	64	139	139	173	174	214	219	155	155	132	132
S13_M6a_6C_3	M6a	315	315	116	131	125	125	183	186	NA	NA	155	155	NA	NA	93	93	215	219	52	69	NA	NA	NA	NA	139	142	129	129	302	302	157	160	NA	NA	NA	NA	NA	NA	NA	NA	173	192	NA	NA	NA	NA	NA	NA
S13_P10a_10_2	P10a	315	315	131	131	121	121	180	183	NA	NA	159	166	NA	NA	87	87	214	214	69	73	147	152	236	236	136	142	129	129	302	302	163	163	162	171	246	249	61	61	137	140	210	210	NA	NA	145	145	122	125
S13_P10a_10_3	P10a	315	321	128	131	121	121	177	180	NA	NA	146	159	137	140	87	97	214	214	69	73	147	147	236	238	139	142	129	129	302	302	163	163	162	171	249	255	61	61	137	137	171	210	NA	NA	NA	NA	142	142
S13_P10a_14A_3	P10a	315	315	128	131	121	121	183	183	223	223	159	170	129	129	87	87	214	214	69	73	147	152	236	238	121	136	129	136	302	302	160	163	171	177	243	255	61	61	137	140	171	189	NA	NA	145	150	NA	NA
S13_P10a_39_1	P10a	315	315	114	131	121	121	180	180	NA	NA	155	171	129	137	87	87	214	214	69	73	147	147	236	236	121	121	129	129	302	302	163	166	162	171	249	249	61	64	137	137	171	171	214	219	NA	NA	122	135
S13_P10a_39_3	P10a	305	305	131	131	121	121	NA	NA	220	220	170	170	137	137	87	87	209	209	69	69	147	147	238	238	121	121	145	145	NA	NA	163	163	168	168	249	249	61	64	137	137	174	174	NA	NA	NA	NA	132	135
S13_P10a_39_4	P10a	315	315	131	131	121	121	177	177	220	220	155	171	129	137	87	97	214	214	69	73	147	147	236	236	121	139	129	129	302	302	163	163	162	162	249	249	61	61	137	139	171	171	NA	NA	145	164	135	135
S13_P10a_43_1	P10a	312	315	128	128	121	121	180	183	217	223	155	166	129	129	87	87	213	213	69	73	NA	NA	236	238	121	139	129	129	302	302	160	163	162	174	255	255	61	64	137	139	171	198	214	222	145	145	132	132
S13_P10a_6_1	P10a	303	315	128	131	121	121	177	177	197	226	146	170	NA	NA	87	87	214	214	69	73	147	147	236	238	121	139	129	129	302	302	163	166	162	171	NA	NA	61	61	137	139	170	170	NA	NA	NA	NA	135	135
S13_P10a_9_1	P10a	321	321	NA	NA	121	125	180	180	220	220	159	159	NA	NA	87	87	214	214	69	73	NA	NA	236	236	121	142	129	129	290	302	163	163	NA	NA	NA	NA	61	64	142	142	171	198	NA	NA	145	145	125	132
S13_M8a_13_1	M8a	315	315	122	128	121	121	180	180	NA	NA	146	146	137	137	95	95	141	141	69	69	NA	NA	238	238	142	155	129	129	290	302	160	171	168	168	249	249	61	61	140	140	185	185	214	214	150	155	132	142
S13_M8a_16_1	M8a	315	324	128	131	125	125	171	186	197	220	146	167	137	137	87	93	NA	NA	69	69	154	154	237	237	133	146	129	129	290	302	160	166	165	168	249	249	NA	NA	138	140	192	192	NA	NA	150	157	138	138
S13_M8a_18_4	M8a	321	321	128	128	125	125	174	183	217	220	146	163	NA	NA	87	87	213	213	69	69	168	168	237	237	138	142	129	129	302	302	163	163	165	168	243	249	64	64	138	142	167	167	214	214	150	150	NA	NA
S13_M8a_21_1	M8a	315	315	116	131	125	125	186	186	217	217	146	167	134	134	93	93	213	213	69	73	NA	NA	237	237	142	142	129	129	302	302	160	160	165	165	249	249	64	64	140	140	194	194	214	214	157	157	NA	NA
S13_M8a_29A_3	M8a	315	315	111	128	125	125	177	186	NA	NA	146	146	137	137	87	87	141	141	69	69	NA	NA	232	238	130	139	129	129	302	302	160	163	165	168	249	249	61	64	NA	NA	167	171	214	219	150	150	132	132
S13_M8a_35_1	M8a	315	315	128	131	125	125	174	180	197	197	146	146	134	140	87	89	213	213	69	69	145	168	238	238	139	155	129	129	302	302	160	160	168	174	243	249	61	64	137	140	194	194	NA	NA	155	157	132	132
S13_P2b_12_1	P2b	321	321	114	131	125	125	183	183	209	209	156	159	129	129	101	101	156	209	69	69	147	164	236	236	138	138	129	150	302	302	NA	NA	165	165	240	246	61	61	NA	NA	189	189	214	219	145	155	132	132
S13_P2b_12_3	P2b	321	321	114	131	125	129	183	183	217	220	159	159	139	141	97	101	218	223	69	73	NA	NA	238	238	NA	NA	129	150	302	302	163	163	165	165	243	246	64	64	136	144	167	189	214	214	155	155	132	135
S13_P2b_25_1	P2b	321	321	119	119	121	129	183	183	217	217	159	159	132	132	97	97	212	214	69	69	147	152	236	238	138	138	129	129	302	302	163	163	165	165	255	255	61	64	136	136	167	167	214	214	164	164	135	135
S13_P2b_28_1	P2b	321	321	114	119	129	129	183	183	NA	NA	159	159	132	132	97	97	211	211	69	69	145	164	NA	NA	139	139	129	129	NA	NA	163	171	165	165	246	246	61	61	136	136	171	189	NA	NA	NA	NA	122	132
S13_P2b_31_1	P2b	321	321	114	125	125	125	183	183	209	209	159	159	NA	NA	101	101	156	156	69	69	164	164	236	236	139	139	150	150	302	302	160	163	165	165	255	255	64	64	144	144	171	171	NA	NA	155	157	NA	NA
S13_P2b_31_3	P2b	312	321	114	114	129	129	183	183	220	220	159	159	NA	NA	101	101	156	214	69	69	164	164	237	237	139	142	129	129	302	302	163	163	165	165	255	255	64	64	138	144	171	171	214	214	145	155	NA	NA
S13_P2b_33_1	P2b	321	321	114	114	125	129	183	183	188	188	159	159	NA	NA	97	97	156	223	69	73	152	152	236	236	138	138	129	129	302	302	163	163	165	165	240	255	64	64	138	138	171	189	NA	NA	NA	NA	132	135
S13_P2b_34_3	P2b	321	321	111	111	125	125	183	183	NA	NA	155	159	NA	NA	87	87	196	196	69	69	150	150	238	238	142	142	129	139	302	302	163	163	165	168	255	255	64	69	140	140	174	174	NA	NA	164	164	132	132
S13_P2b_6_1	P2b	312	321	114	119	129	129	183	183	188	217	159	159	126	126	97	101	223	223	69	69	NA	NA	238	238	139	139	129	150	290	290	160	163	165	165	246	255	61	64	136	136	171	189	NA	NA	NA	NA	NA	NA
S13_P2b_8_1	P2b	321	321	119	131	125	129	NA	NA	188	217	159	159	129	141	97	97	212	212	69	69	164	164	238	238	139	142	129	150	302	302	163	163	158	165	255	255	61	61	NA	NA	167	171	214	214	157	157	135	135
S13_P5b_19_3	P5b	321	321	119	131	129	129	183	183	NA	NA	159	159	129	129	87	87	214	214	69	79	152	152	240	240	136	136	129	129	302	302	NA	NA	159	159	255	255	61	61	NA	NA	189	189	NA	NA	NA	NA	NA	NA
S13_P5b_19_4	P5b	318	321	NA	NA	121	125	183	186	NA	NA	146	155	132	137	97	97	223	223	69	69	NA	NA	NA	NA	139	142	129	136	290	290	NA	NA	162	165	246	246	61	64	138	141	167	167	208	208	145	155	132	142
S13_P5b_22_3	P5b	318	321	128	131	121	121	183	183	220	220	151	155	NA	NA	97	97	165	165	NA	NA	147	166	239	239	127	142	129	136	290	302	154	163	165	165	249	255	61	64	NA	NA	167	171	NA	NA	NA	NA	132	135
S13_P5b_26_2	P5b	305	305	122	125	125	129	183	183	212	223	146	159	NA	NA	87	97	220	220	69	78	NA	NA	232	232	139	139	136	139	290	290	160	160	165	165	240	246	61	64	138	140	167	171	214	217	158	158	NA	NA
S13_P6b_1_3	P6b	324	324	122	128	121	125	171	180	NA	NA	151	155	NA	NA	97	97	NA	NA	69	78	NA	NA	235	235	142	142	136	139	290	302	148	148	165	165	240	240	NA	NA	140	140	167	181	214	219	NA	NA	NA	NA
S13_P6b_19_1	P6b	321	321	128	128	125	129	183	183	NA	NA	155	159	NA	NA	83	97	220	220	69	69	145	145	236	238	136	142	129	129	302	302	160	163	165	168	240	243	61	61	137	140	189	192	214	219	145	145	132	132
S13_P6b_21_3	P6b	321	321	128	128	121	121	183	183	220	223	159	163	NA	NA	83	97	NA	NA	NA	NA	147	152	235	239	133	139	129	129	290	302	163	163	168	171	240	255	NA	NA	137	137	167	181	NA	NA	145	150	132	132
S13_P3b_14_3	P3b	315	315	116	122	125	125	183	183	NA	NA	155	155	134	134	87	97	156	209	69	69	156	160	236	238	139	142	129	129	302	302	NA	NA	168	171	237	249	NA	NA	138	142	167	173	NA	NA	145	150	NA	NA
S13_P3b_15_3	P3b	315	318	131	131	121	121	183	183	217	220	155	159	NA	NA	80	87	134	134	69	69	152	172	236	236	142	142	129	139	290	290	163	163	159	165	249	255	61	61	138	138	189	192	NA	NA	155	170	132	132
S13_P3b_16_3	P3b	324	324	122	128	125	125	183	183	NA	NA	167	167	134	137	86	93	219	219	69	69	NA	NA	NA	NA	138	142	129	129	302	302	163	171	158	165	234	243	61	61	138	142	167	189	214	219	155	164	132	135
S13_P3b_16B_2	P3b	321	324	116	131	125	125	183	186	217	217	155	159	140	146	91	93	214	219	69	69	NA	NA	236	240	139	142	129	129	302	302	157	163	159	165	240	249	64	64	NA	NA	NA	NA	214	219	150	150	132	138
S13_P3b_17_1	P3b	321	324	116	116	121	125	186	186	NA	NA	151	167	137	141	83	93	214	214	69	69	152	152	236	236	NA	NA	129	134	302	302	157	163	171	171	245	249	61	61	142	142	167	167	214	219	145	155	132	135
S13_P3b_25_3	P3b	315	321	122	131	125	125	183	186	NA	NA	155	167	NA	NA	93	95	NA	NA	69	69	147	152	NA	NA	139	142	129	134	302	302	157	163	165	165	245	245	61	61	NA	NA	167	173	NA	NA	155	155	132	132
S13_P3b_28_1	P3b	324	324	116	122	125	129	183	183	217	217	156	159	136	140	87	91	214	214	69	69	147	156	240	240	139	142	129	129	302	302	NA	NA	171	171	249	249	61	61	137	142	167	173	NA	NA	150	155	132	135
S13_P3b_28_3	P3b	315	315	131	131	125	125	183	183	217	217	159	159	140	146	NA	NA	156	214	69	69	156	156	240	240	139	139	129	129	302	302	157	157	168	171	240	240	61	64	137	142	173	173	NA	NA	150	155	132	132
S13_P3b_36_1	P3b	321	324	116	128	125	125	183	183	220	223	156	167	144	146	93	97	214	222	69	78	NA	NA	236	240	142	142	129	129	290	302	163	163	165	171	243	245	61	61	137	142	167	167	NA	NA	155	155	135	138
S13_P3b_36_2	P3b	315	324	116	116	125	125	183	186	NA	NA	NA	NA	140	144	87	97	214	214	69	69	160	160	NA	NA	139	142	129	129	290	302	157	163	165	171	245	249	61	61	137	142	185	208	NA	NA	155	155	132	138
S13_P9b_11_1	P9b	308	321	128	131	125	125	183	183	220	220	157	167	NA	NA	93	93	190	214	69	69	147	150	238	238	142	146	136	136	290	290	157	171	159	165	NA	NA	61	61	140	140	171	171	214	219	NA	NA	132	135
S13_P9b_11B_4	P9b	308	315	116	128	121	125	183	186	220	220	159	167	143	143	86	86	123	123	69	69	152	152	238	238	142	146	129	136	290	290	157	171	165	165	245	252	NA	NA	139	139	189	212	NA	NA	NA	NA	135	135
S13_P9b_12_2	P9b	315	315	128	128	121	125	183	186	NA	NA	155	159	NA	NA	78	82	134	134	69	69	147	152	238	238	121	146	129	136	290	290	157	157	165	165	240	243	61	61	137	140	192	210	214	219	155	155	132	132
S13_P9b_12_3	P9b	315	315	128	128	121	125	183	186	NA	NA	155	167	NA	NA	78	78	217	217	69	69	152	166	NA	NA	121	121	129	129	290	290	157	157	162	165	240	243	61	76	137	137	171	192	NA	NA	155	155	132	135
S13_P9b_13_3	P9b	308	318	131	131	121	121	186	186	NA	NA	159	159	141	146	NA	NA	217	217	69	69	150	172	NA	NA	142	142	129	129	290	290	171	171	165	174	243	254	61	64	140	140	189	210	214	219	155	155	132	135
S13_P9b_13_4	P9b	315	315	131	131	NA	NA	171	186	NA	NA	157	167	NA	NA	82	82	134	134	69	69	NA	NA	236	236	139	142	129	129	290	290	171	171	162	165	246	254	61	61	140	140	173	189	214	219	NA	NA	132	135
S13_P9b_18_4	P9b	315	315	131	131	121	125	NA	NA	217	220	155	155	141	141	82	82	196	196	69	69	159	159	NA	NA	142	142	129	129	290	290	157	157	162	162	243	243	61	64	137	137	171	171	231	231	150	155	NA	NA
S13_P9b_19_2	P9b	318	318	131	131	121	121	183	186	217	217	159	159	134	146	78	97	213	217	69	78	NA	NA	NA	NA	121	142	129	129	290	290	157	163	NA	NA	NA	NA	61	78	140	140	NA	NA	NA	NA	150	150	121	121
S13_P9b_24_1	P9b	315	315	131	131	125	125	183	183	NA	NA	159	167	146	146	97	97	134	217	69	69	NA	NA	238	238	142	142	129	129	290	302	160	163	165	174	NA	NA	61	61	138	138	173	192	214	222	NA	NA	132	132
S13_P9b_28_2	P9b	321	321	116	131	121	121	183	183	220	220	155	167	143	146	78	80	134	134	69	69	NA	NA	236	236	142	142	129	129	290	290	163	163	159	165	243	251	61	61	138	138	192	212	214	219	NA	NA	NA	NA
S13_P9b_29B_4	P9b	308	318	131	131	121	121	NA	NA	220	220	157	159	NA	NA	82	82	134	214	69	69	NA	NA	237	237	142	142	NA	NA	290	290	148	163	168	174	243	249	61	61	137	137	171	210	NA	NA	155	155	NA	NA
S13_M7b_1_2	M7b	315	324	128	128	121	121	174	183	217	217	146	146	NA	NA	NA	NA	134	196	69	69	152	172	238	238	138	138	129	129	290	302	151	166	168	168	243	246	61	61	137	142	189	192	214	219	NA	NA	122	138
S13_M7b_11_4	M7b	321	324	122	128	121	125	NA	NA	NA	NA	151	151	134	134	93	95	217	217	69	69	147	152	238	238	138	138	129	129	302	302	166	166	168	168	243	245	61	61	140	140	189	189	214	219	155	155	132	135
S13_M7b_19A_4	M7b	315	315	122	128	125	125	174	183	NA	NA	151	167	NA	NA	NA	NA	NA	NA	69	69	147	147	238	238	136	142	129	129	302	302	166	171	165	165	243	255	NA	NA	142	142	171	171	214	219	155	155	122	135
S13_M7b_2_4	M7b	321	321	128	128	125	125	171	186	217	217	146	146	131	131	86	86	223	223	69	69	172	182	238	238	142	146	129	129	302	302	163	163	168	171	251	251	61	61	NA	NA	167	171	214	219	155	155	128	135
S13_M7b_22_4	M7b	315	321	128	131	121	125	174	183	NA	NA	146	155	136	140	87	95	196	196	69	69	147	172	238	238	139	142	129	129	302	302	160	163	165	165	NA	NA	61	64	138	138	185	185	NA	NA	NA	NA	132	132
S13_M7b_6B_3	M7b	315	321	116	131	NA	NA	171	186	212	217	146	155	136	140	86	86	196	223	52	69	182	182	NA	NA	136	136	129	129	302	302	163	171	168	168	243	243	61	61	137	142	185	185	NA	NA	155	158	132	138
S13_M7b_8_4	M7b	321	321	NA	NA	125	125	183	186	217	217	151	151	140	144	NA	NA	213	213	66	73	NA	NA	NA	NA	136	138	129	129	302	302	163	171	168	171	243	249	73	73	140	142	167	185	214	219	155	155	NA	NA
S13_P1a_12_1	P1a	321	321	131	131	121	129	183	183	220	220	155	159	129	143	87	87	150	214	69	73	NA	NA	240	240	136	136	129	129	302	302	163	163	159	174	255	255	61	61	137	137	189	189	219	219	NA	NA	122	135
S13_P1a_13_2	P1a	312	321	128	128	121	121	183	183	220	220	159	159	NA	NA	87	87	214	214	69	78	NA	NA	NA	NA	139	139	129	129	302	302	163	163	174	174	255	255	NA	NA	NA	NA	189	189	219	219	NA	NA	128	128
S13_P1a_13_3	P1a	321	321	128	128	NA	NA	183	183	NA	NA	155	159	129	129	NA	NA	214	214	78	78	152	152	240	240	149	149	129	129	302	302	163	163	NA	NA	255	255	61	64	NA	NA	189	189	214	219	NA	NA	NA	NA
S13_P1a_16_3	P1a	321	321	128	131	121	129	183	186	NA	NA	155	159	NA	NA	87	87	150	214	78	78	NA	NA	240	240	136	136	129	150	302	302	157	163	174	177	252	252	61	61	137	137	189	189	NA	NA	157	157	NA	NA
S13_P1a_16_4	P1a	321	321	128	131	121	129	NA	NA	220	220	159	159	129	143	87	87	217	217	69	79	152	152	240	240	136	136	129	150	302	302	163	163	174	177	252	255	61	61	137	137	171	189	219	219	157	158	122	122
S13_P1a_25_4	P1a	315	321	131	131	121	129	183	186	220	220	159	159	NA	NA	87	87	214	214	NA	NA	NA	NA	240	240	139	149	129	150	290	290	157	157	174	174	255	255	61	64	NA	NA	189	189	219	219	NA	NA	122	128
S13_P1a_35_3	P1a	321	321	131	131	122	131	183	183	NA	NA	159	159	143	143	87	87	214	214	69	73	152	152	240	240	136	136	129	129	302	302	163	163	165	165	252	255	61	61	NA	NA	171	189	NA	NA	158	158	122	122
S13_P1a_5_2	P1a	312	321	131	131	121	121	NA	NA	220	220	155	159	129	141	87	87	214	217	69	79	152	152	240	240	136	136	129	129	302	302	157	163	174	174	252	255	61	61	137	137	189	189	214	219	NA	NA	122	135
S13_P9a_11_1	P9a	315	315	128	128	121	129	177	186	NA	NA	147	167	NA	NA	87	87	153	218	69	73	150	159	237	237	136	139	129	129	302	302	163	163	171	171	240	249	64	64	140	140	188	188	214	214	155	155	122	135
S13_P9a_11_3	P9a	315	321	128	128	NA	NA	186	186	220	220	147	155	136	140	83	87	213	215	69	73	NA	NA	234	238	139	142	129	129	290	302	157	163	159	165	240	240	64	64	140	140	NA	NA	214	214	NA	NA	122	122
S13_P9a_30_4	P9a	321	321	128	131	121	129	183	186	220	220	155	163	NA	NA	87	87	215	218	NA	NA	NA	NA	236	238	136	139	129	129	290	302	157	163	165	171	240	252	61	69	138	140	192	192	214	222	155	158	142	142
S13_P9a_38_4	P9a	315	315	128	128	121	129	183	183	NA	NA	147	163	NA	NA	83	87	153	209	69	73	137	159	238	238	121	142	129	129	290	302	157	163	159	165	249	249	61	61	137	140	188	192	214	222	155	155	132	135
S13_P9a_40_1	P9a	308	312	122	128	121	121	186	186	NA	NA	155	155	NA	NA	80	87	209	220	73	73	150	159	236	236	139	142	129	129	302	302	157	163	159	174	240	249	61	61	137	140	167	167	NA	NA	NA	NA	132	135
S13_P9a_42_3	P9a	308	324	131	131	121	129	183	186	197	217	146	155	136	140	83	83	153	215	73	73	150	160	236	236	139	139	129	129	302	302	157	163	165	165	249	249	61	61	137	140	189	189	222	222	145	145	135	135
S13_P9a_5_3	P9a	318	318	128	131	121	129	183	186	220	220	146	163	140	140	83	87	159	209	73	73	NA	NA	NA	NA	142	142	129	129	302	302	163	163	159	165	NA	NA	61	61	137	137	167	188	214	222	145	155	135	135
S13_P9a_5_4	P9a	318	318	128	128	129	129	183	183	220	220	147	163	140	140	83	87	159	220	69	73	150	150	236	236	142	142	129	129	302	302	157	163	165	171	249	249	61	64	137	137	167	188	NA	NA	NA	NA	122	128
S13_M6a_10B_2	M6a	321	321	111	125	125	125	171	186	220	220	159	163	129	136	87	97	195	217	69	69	NA	NA	235	238	142	146	129	129	302	302	160	163	168	168	249	255	61	61	NA	NA	167	189	214	219	150	158	132	135
S13_M6a_11_1	M6a	315	321	119	119	125	125	171	183	NA	NA	146	146	134	134	87	87	213	217	69	69	152	168	235	235	133	142	129	129	290	302	163	163	165	168	255	265	61	64	138	138	167	167	214	217	155	155	132	132
S13_M6a_12A_3	M6a	315	321	111	122	121	125	NA	NA	220	220	146	146	134	134	87	93	196	196	69	69	147	150	232	242	142	146	129	139	302	302	163	163	159	168	245	255	61	64	140	140	189	194	NA	NA	157	158	132	132
S13_M6a_14_4	M6a	321	321	128	128	125	125	186	186	197	220	146	167	137	137	95	95	196	213	69	69	NA	NA	NA	NA	142	146	129	139	302	302	163	163	165	165	249	255	61	64	139	139	189	194	NA	NA	NA	NA	121	121
S13_M6a_8_1	M6a	321	321	128	131	125	125	177	186	220	220	146	170	NA	NA	87	87	196	196	NA	NA	NA	NA	NA	NA	133	146	129	129	302	302	163	163	168	168	245	265	61	61	NA	NA	192	194	219	219	155	157	132	132
S13_M6a_8A_4	M6a	321	321	111	128	121	121	177	183	220	220	146	146	129	134	87	87	196	196	69	69	152	168	NA	NA	138	138	129	139	302	302	163	163	159	168	249	265	64	64	138	138	167	194	NA	NA	155	155	132	132
S13_P10a_10_1	P10a	315	321	131	131	121	121	NA	NA	NA	NA	159	159	137	140	87	97	214	214	69	73	145	147	NA	NA	136	142	129	129	302	302	160	163	171	171	NA	NA	61	61	137	140	171	171	NA	NA	145	145	142	142
S13_P10a_22_2	P10a	315	315	128	131	NA	NA	183	186	NA	NA	155	159	134	144	87	87	213	213	69	73	NA	NA	NA	NA	121	139	129	129	302	302	160	163	162	162	243	255	61	61	139	142	171	174	NA	NA	NA	NA	132	142
S13_P10a_22_3	P10a	315	315	128	131	121	121	NA	NA	223	223	146	159	129	144	87	87	213	213	69	73	145	147	236	236	139	142	129	129	302	302	163	163	165	174	NA	NA	61	64	137	139	189	189	NA	NA	170	170	125	132
S13_P10a_22_4	P10a	315	321	128	131	121	121	180	180	NA	NA	146	159	129	146	87	87	214	214	69	73	NA	NA	NA	NA	139	142	129	129	302	302	163	163	171	174	249	255	61	61	137	137	171	171	NA	NA	145	155	132	135
S13_P10a_39A_2	P10a	315	321	128	131	121	121	177	177	NA	NA	171	171	137	137	87	97	214	214	69	73	147	147	236	236	121	121	129	129	302	302	163	163	171	171	249	249	61	64	137	142	171	171	NA	NA	NA	NA	122	132
S13_P10a_43_3	P10a	315	321	128	131	121	121	177	180	197	217	146	166	129	129	87	87	213	213	69	73	145	152	236	238	121	136	129	129	290	302	160	160	162	171	243	255	61	61	139	139	171	198	214	219	145	155	132	135
S13_P10a_43_4	P10a	315	315	128	131	121	121	177	180	223	223	159	166	NA	NA	87	87	214	214	73	75	145	152	236	236	139	139	129	129	302	302	160	163	171	177	255	255	61	61	137	139	NA	NA	214	214	145	145	122	132
S13_P10a_6_3	P10a	315	315	128	131	121	121	177	180	223	226	159	170	NA	NA	87	87	213	213	69	73	145	147	236	238	136	139	129	129	302	302	163	163	162	174	240	255	61	61	139	139	189	189	219	222	156	158	135	142
S13_P10a_9_2	P10a	315	321	114	131	121	121	180	183	NA	NA	146	159	129	129	87	97	NA	NA	NA	NA	NA	NA	NA	NA	121	136	129	129	302	302	160	163	162	171	NA	NA	61	61	137	142	198	210	NA	NA	145	150	NA	NA
S13_P10a_9_3	P10a	315	321	114	131	121	121	180	183	NA	NA	146	159	129	129	87	97	214	214	NA	NA	147	147	238	238	121	136	129	129	302	302	163	163	162	171	240	243	61	64	142	142	210	210	NA	NA	NA	NA	132	142
S13_M8a_1_3	M8a	321	321	116	128	125	125	174	183	217	220	146	157	137	140	80	95	223	223	69	69	NA	NA	238	238	138	142	129	129	302	302	163	171	168	168	249	249	61	64	138	138	189	189	NA	NA	NA	NA	135	138
S13_M8a_16_2	M8a	315	315	111	111	125	125	NA	NA	NA	NA	146	146	NA	NA	93	93	213	213	52	52	154	154	NA	NA	146	146	129	129	302	302	163	166	165	168	249	249	61	61	140	140	174	174	NA	NA	157	157	138	138
S13_M8a_16_4	M8a	315	315	111	128	121	125	183	183	NA	NA	146	155	NA	NA	93	95	213	213	69	69	NA	NA	237	242	139	146	129	129	302	302	163	166	165	165	NA	NA	61	64	140	144	NA	NA	214	217	157	157	135	138
S13_M8a_21_4	M8a	315	315	131	131	125	125	NA	NA	NA	NA	146	167	134	134	93	93	213	213	69	73	NA	NA	237	242	142	142	129	129	302	302	160	160	165	165	249	249	64	64	140	140	194	194	214	214	157	157	127	127
S13_M8a_21A_3	M8a	315	315	111	131	125	125	NA	NA	NA	NA	146	167	NA	NA	87	93	213	213	52	52	NA	NA	242	242	142	142	NA	NA	302	302	160	163	159	165	243	249	61	64	138	140	194	194	NA	NA	150	157	NA	NA
S13_M8a_29_1	M8a	315	315	111	128	125	125	177	186	NA	NA	146	146	134	137	87	87	213	213	69	69	145	147	NA	NA	139	142	129	129	302	302	163	171	165	168	249	249	61	61	138	140	189	194	NA	NA	150	150	132	132
S13_M8a_35_2	M8a	315	315	111	128	125	125	180	186	NA	NA	146	157	140	146	89	95	NA	NA	69	69	168	168	238	238	155	155	129	129	302	302	160	163	165	165	249	249	61	61	137	137	194	194	NA	NA	NA	NA	NA	NA
S13_M8a_38_1	M8a	308	321	128	131	125	125	186	186	NA	NA	146	146	140	144	80	95	NA	NA	NA	NA	156	168	238	238	139	145	129	129	302	302	160	171	165	165	243	251	64	64	NA	NA	170	192	214	214	158	158	132	138
S13_P2b_12_4	P2b	321	321	114	131	125	129	183	183	NA	NA	156	167	132	141	101	101	156	156	NA	NA	NA	NA	NA	NA	139	139	129	150	302	302	163	163	165	165	246	255	64	64	139	144	167	192	NA	NA	155	155	NA	NA
S13_P2b_21_3	P2b	305	324	122	131	121	125	171	186	217	220	146	146	137	146	87	97	156	219	69	69	152	152	232	238	121	142	129	129	302	302	163	163	165	174	249	255	61	64	140	142	192	192	214	219	NA	NA	135	138
S13_P2b_25_3	P2b	315	321	114	119	125	129	183	183	209	209	159	159	NA	NA	97	97	156	214	69	69	NA	NA	236	238	138	138	129	150	302	302	163	163	159	165	240	255	61	64	138	140	171	171	NA	NA	145	157	132	135
S13_P2b_25_4	P2b	321	321	119	119	129	129	183	183	NA	NA	159	159	129	132	97	101	212	214	69	69	147	147	NA	NA	138	138	129	150	302	302	NA	NA	159	165	255	255	61	64	136	136	167	189	214	214	NA	NA	135	135
S13_P2b_33_2	P2b	321	321	114	119	129	129	NA	NA	NA	NA	159	159	132	132	97	97	156	209	69	69	145	155	236	236	138	138	129	129	302	302	160	163	165	165	240	255	61	64	136	136	167	189	NA	NA	145	155	135	135
S13_P2b_34B_4	P2b	321	321	114	119	125	129	NA	NA	NA	NA	159	168	126	126	97	101	156	156	69	69	NA	NA	238	238	139	142	145	150	302	302	163	163	165	165	240	255	64	64	140	140	NA	NA	NA	NA	170	170	132	135
S13_P2b_6_2	P2b	318	321	114	119	129	129	183	183	NA	NA	159	159	126	132	97	97	209	223	69	69	NA	NA	NA	NA	139	139	129	150	290	302	160	163	159	165	NA	NA	NA	NA	136	136	167	189	NA	NA	145	170	132	135
S13_P2b_6_4	P2b	321	321	114	131	125	125	183	183	NA	NA	159	159	139	139	97	101	211	211	69	69	147	152	238	238	139	139	129	150	302	302	160	163	165	165	246	255	61	61	136	136	167	171	214	226	145	145	132	132
S13_P2b_8_3	P2b	312	312	114	131	129	129	NA	NA	NA	NA	159	159	NA	NA	97	101	156	214	73	73	NA	NA	NA	NA	139	139	129	145	290	302	163	163	159	165	255	255	61	61	138	138	NA	NA	214	214	NA	NA	132	132
S13_P5b_12_4	P5b	315	321	116	125	125	125	183	186	220	220	146	146	146	146	80	80	213	213	69	78	152	152	NA	NA	142	142	129	136	290	290	154	154	165	165	246	246	61	64	136	136	167	167	214	219	150	158	NA	NA
S13_P5b_26_4	P5b	305	305	111	128	121	125	NA	NA	NA	NA	159	159	145	145	83	97	214	220	69	69	NA	NA	232	232	139	139	NA	NA	290	302	154	163	165	165	NA	NA	61	64	138	140	167	171	217	219	NA	NA	132	135
S13_P6b_1_4	P6b	315	324	128	131	121	121	183	186	189	220	159	163	NA	NA	97	97	214	214	69	69	152	171	232	235	139	142	129	139	290	290	NA	NA	165	168	249	255	61	61	137	140	167	181	NA	NA	155	157	135	138
S13_P6b_7_2	P6b	315	321	122	128	121	125	NA	NA	NA	NA	146	159	140	146	97	101	214	220	69	69	160	166	NA	NA	139	146	129	136	290	302	160	160	165	168	249	249	61	61	137	137	167	167	NA	NA	155	155	132	132
S13_P6b_8_4	P6b	321	321	128	131	117	121	183	183	189	189	155	159	140	146	83	97	223	223	69	69	NA	NA	233	237	124	127	129	136	290	302	148	160	165	168	240	246	61	64	137	140	181	192	214	214	164	164	132	135
S13_P3b_17_3	P3b	321	324	122	128	125	125	183	186	188	223	155	163	141	144	83	93	219	219	78	78	147	152	239	239	142	142	129	134	302	302	163	163	171	171	245	249	61	61	137	142	173	173	214	219	155	155	135	135
S13_P3b_25_2	P3b	321	321	116	116	125	129	183	183	NA	NA	155	167	136	136	93	95	214	214	69	69	NA	NA	239	239	139	142	129	129	302	302	157	157	165	171	NA	NA	61	61	137	137	167	185	214	214	145	155	132	132
S13_P3b_25B_4	P3b	315	321	122	122	125	129	183	183	NA	NA	159	159	136	136	87	87	214	222	69	69	152	156	239	239	139	139	129	129	302	302	157	157	165	165	237	245	61	61	137	137	167	189	214	234	NA	NA	132	132
S13_P3b_27_3	P3b	315	315	122	122	125	125	183	183	220	220	151	151	NA	NA	NA	NA	219	219	69	73	145	147	236	240	142	142	129	129	302	302	166	169	171	171	245	249	64	64	140	140	167	173	214	234	155	155	NA	NA
S13_P3b_28_2	P3b	315	315	116	116	125	125	183	183	NA	NA	159	159	NA	NA	87	97	156	219	69	69	156	160	NA	NA	139	139	129	129	302	302	157	157	171	171	NA	NA	61	64	137	137	173	173	NA	NA	NA	NA	132	132
S13_P3b_31_2	P3b	315	315	122	131	125	129	183	186	NA	NA	151	159	NA	NA	87	97	214	214	69	69	152	160	NA	NA	139	142	129	134	302	302	157	169	165	180	245	249	61	64	NA	NA	167	167	NA	NA	NA	NA	132	135
S13_P9b_11_3	P9b	308	308	128	128	121	125	NA	NA	220	220	155	155	134	143	NA	NA	123	123	69	69	150	152	238	238	146	146	136	136	302	302	157	157	165	165	246	252	64	64	136	139	189	189	NA	NA	NA	NA	NA	NA
S13_P9b_12_1	P9b	308	315	128	131	121	129	NA	NA	NA	NA	155	155	134	140	82	97	214	214	69	69	152	166	236	238	142	146	129	129	290	302	157	157	165	165	NA	NA	61	61	138	138	210	212	214	219	NA	NA	132	135
S13_P9b_19_1	P9b	308	318	116	131	121	121	183	183	217	220	159	159	123	146	78	97	214	214	69	69	NA	NA	236	236	110	121	129	129	290	302	157	157	165	174	NA	NA	61	61	140	140	167	171	214	219	150	155	132	142
S13_P9b_25_1	P9b	315	321	128	131	121	121	183	183	217	220	159	167	146	146	80	87	134	134	69	69	152	152	236	236	139	142	129	129	290	302	160	163	165	165	NA	NA	61	61	138	138	189	192	214	219	NA	NA	NA	NA
S13_P9b_25_4	P9b	315	315	131	131	121	121	183	186	220	223	155	167	146	146	82	82	134	134	69	69	150	150	236	236	142	142	129	129	290	302	163	163	159	165	240	243	61	61	138	138	212	212	219	219	NA	NA	NA	NA
S13_P9b_28_1	P9b	308	321	128	131	121	121	NA	NA	209	223	159	170	140	146	80	82	134	214	NA	NA	NA	NA	NA	NA	142	142	129	129	302	302	160	163	159	174	243	249	61	61	139	139	171	192	219	222	155	155	132	135
S13_P9b_29_1	P9b	318	318	131	131	121	121	NA	NA	220	220	164	175	119	140	80	87	134	217	69	78	147	166	237	237	110	142	129	129	290	290	163	171	168	174	243	249	61	61	137	142	171	210	214	219	NA	NA	NA	NA
S13_P9b_29_3	P9b	308	308	128	131	121	121	180	183	220	220	159	164	140	140	87	87	134	214	69	69	NA	NA	237	237	142	142	129	150	290	302	160	163	165	174	246	249	61	64	137	137	167	210	222	222	155	155	132	132
S13_M7b_1_3	M7b	315	321	128	128	121	125	171	174	217	217	146	151	NA	NA	NA	NA	213	213	NA	NA	145	152	238	238	139	142	129	129	302	302	151	163	168	171	243	243	61	61	137	142	189	192	NA	NA	NA	NA	122	135
S13_M7b_11_1	M7b	315	321	128	128	121	125	183	183	217	217	146	167	134	134	93	95	217	217	69	69	147	147	238	238	138	138	129	129	302	302	151	163	165	168	243	243	61	64	138	140	167	189	214	219	155	155	132	132
S13_M7b_12_1	M7b	324	324	128	128	121	121	171	174	217	217	155	167	NA	NA	86	86	213	213	69	69	152	182	238	238	139	142	129	145	NA	NA	163	163	165	165	243	243	61	61	138	142	185	185	NA	NA	NA	NA	135	135
S13_M7b_12_2	M7b	324	324	116	116	121	125	171	183	217	217	167	167	136	136	NA	NA	211	211	69	69	NA	NA	238	238	139	142	129	145	302	302	160	166	165	171	243	246	61	61	142	142	185	185	NA	NA	155	157	135	138
S13_M7b_2_3	M7b	321	324	128	128	121	125	183	186	217	217	146	151	131	131	86	86	219	223	69	69	152	152	238	238	146	146	129	129	302	302	163	171	171	174	243	255	61	64	140	142	167	167	NA	NA	NA	NA	128	132
S13_M7b_22_2	M7b	315	321	128	128	121	121	171	186	NA	NA	146	151	134	140	NA	NA	219	219	69	69	147	152	238	238	139	142	129	129	NA	NA	163	171	165	165	243	249	64	64	138	140	167	185	214	214	155	155	NA	NA
S13_M7b_26_3	M7b	321	324	122	122	125	125	171	186	217	217	167	167	134	136	87	97	217	223	69	69	NA	NA	238	238	136	139	129	129	302	302	163	163	165	168	243	243	61	61	137	139	165	165	219	244	155	158	132	135
S13_M7b_7_1	M7b	315	321	125	128	125	125	186	186	212	217	151	151	131	144	NA	NA	196	196	69	69	152	152	231	238	142	142	129	129	302	302	163	171	165	165	243	251	73	73	142	142	185	185	214	217	NA	NA	NA	NA
S13_M7b_8_3	M7b	321	321	NA	NA	125	125	186	186	217	217	146	151	140	144	86	95	196	223	69	69	182	182	238	238	136	142	129	129	302	302	163	171	165	171	243	255	61	61	142	142	185	185	NA	NA	NA	NA	128	132
S13_P1a_12_2	P1a	315	321	131	131	121	129	183	183	220	220	155	155	143	143	87	87	150	217	73	79	152	152	240	240	136	136	129	129	302	302	163	163	159	165	252	255	61	64	137	139	189	189	219	219	155	157	NA	NA
S13_P1a_13_4	P1a	321	321	128	128	121	121	183	186	220	220	155	159	129	129	NA	NA	214	214	NA	NA	152	152	240	240	139	149	129	129	302	302	157	163	174	174	255	255	NA	NA	NA	NA	189	189	219	219	156	156	128	128
S13_P1a_25_2	P1a	312	321	128	131	129	129	183	183	NA	NA	159	159	129	154	87	87	214	214	79	79	NA	NA	240	240	136	136	150	150	290	302	157	163	165	174	255	255	61	61	NA	NA	189	189	NA	NA	155	157	128	128
S13_P1a_35_1	P1a	312	321	128	131	121	121	183	186	220	220	159	159	NA	NA	NA	NA	214	214	69	73	152	152	240	240	136	136	129	129	302	302	163	163	165	174	255	255	61	61	137	137	189	189	219	219	156	158	122	122
S13_P1a_4_4	P1a	312	312	128	131	121	121	183	186	220	220	159	159	129	154	NA	NA	150	214	NA	NA	152	152	240	240	136	139	129	150	302	302	157	163	174	174	255	255	61	64	137	137	189	189	NA	NA	NA	NA	135	135
S13_P9a_30_1	P9a	321	321	122	128	129	129	NA	NA	220	220	163	163	141	154	87	87	215	215	73	73	150	152	236	238	139	142	129	129	302	302	157	163	165	171	240	249	61	69	138	140	171	171	214	219	NA	NA	NA	NA
S13_P9a_38_1	P9a	308	308	128	131	129	129	183	183	215	220	155	163	136	136	NA	NA	159	159	73	73	137	150	NA	NA	139	142	129	129	302	302	157	160	165	165	240	249	69	69	137	137	192	192	214	214	NA	NA	135	142
S13_P9a_40_4	P9a	312	315	128	128	121	121	183	183	NA	NA	155	163	140	144	83	87	215	220	73	73	NA	NA	236	236	121	142	129	129	290	302	163	163	165	165	240	249	61	61	137	140	188	188	NA	NA	NA	NA	NA	NA
S13_P9a_5_2	P9a	315	331	128	131	121	121	183	183	220	220	146	155	NA	NA	NA	NA	215	215	73	73	NA	NA	236	236	136	142	NA	NA	290	302	157	163	159	168	249	249	61	64	137	141	NA	NA	NA	NA	155	155	NA	NA
S13_P9a_6_1	P9a	315	318	122	128	129	129	183	183	NA	NA	146	155	141	145	87	87	153	153	69	73	NA	NA	236	238	121	142	129	129	302	302	148	157	165	165	249	249	61	61	NA	NA	188	188	NA	NA	145	158	122	135
S13_P9a_6_3	P9a	315	321	128	128	129	129	183	183	220	220	NA	NA	136	145	NA	NA	153	153	73	73	150	150	236	238	142	142	129	129	302	302	157	163	165	174	249	249	61	61	137	137	188	189	214	214	145	155	122	135
S13_M6a_12_2	M6a	321	321	111	111	125	125	NA	NA	NA	NA	146	146	137	137	NA	NA	196	196	69	69	NA	NA	235	235	146	146	129	129	302	302	163	163	168	168	255	265	64	69	140	140	194	194	214	214	155	158	132	132
S13_M6a_14_2	M6a	315	321	111	128	125	125	183	186	197	220	146	146	134	137	87	95	213	213	69	69	NA	NA	NA	NA	142	142	129	129	302	302	163	163	165	165	255	265	61	64	139	142	189	194	217	219	150	155	132	135
S13_M6a_14B_1	M6a	321	321	128	128	121	125	171	186	NA	NA	167	170	137	137	87	95	196	217	69	69	NA	NA	NA	NA	142	146	129	139	302	302	163	163	165	174	249	255	61	64	138	139	189	194	NA	NA	150	155	132	132
S13_M6a_3_4	M6a	315	321	119	125	125	125	171	183	220	220	146	155	137	137	87	97	173	196	69	69	145	152	NA	NA	138	146	129	139	290	302	163	163	165	165	249	251	NA	NA	140	140	194	194	214	219	145	155	132	135
S13_M6a_5_1	M6a	321	321	111	111	121	125	183	183	209	220	146	146	134	137	NA	NA	NA	NA	69	69	145	156	235	242	142	142	129	139	290	302	160	163	159	168	NA	NA	61	64	140	140	192	192	NA	NA	NA	NA	132	132
S13_M6a_6B_2	M6a	321	321	111	128	125	125	183	186	NA	NA	155	167	129	134	87	87	196	196	69	69	150	150	235	238	121	142	129	129	302	302	163	163	NA	NA	245	255	61	69	138	140	192	192	219	219	155	155	132	132
S13_M6a_8B_3	M6a	315	321	128	131	121	125	174	174	NA	NA	146	167	129	129	NA	NA	196	196	69	69	NA	NA	235	237	121	146	129	139	302	302	163	163	168	168	245	245	61	61	138	138	189	194	NA	NA	155	157	NA	NA
S13_P10a_11_1	P10a	315	321	128	128	121	121	177	183	NA	NA	146	170	129	129	87	87	214	214	69	73	147	152	236	236	136	139	129	129	302	302	160	163	165	171	NA	NA	61	61	137	137	171	189	214	214	145	156	132	135
S13_P10a_11_4	P10a	312	315	128	128	121	121	183	183	197	217	146	159	129	146	87	87	183	214	73	73	147	147	236	238	136	138	129	136	302	302	160	160	162	165	249	255	61	61	137	139	189	198	NA	NA	145	156	132	142
S13_P10a_12_1	P10a	315	321	128	128	121	121	177	180	223	226	159	170	134	144	87	87	214	214	69	73	NA	NA	236	238	136	139	129	129	290	302	163	163	171	171	240	243	61	61	137	137	171	189	NA	NA	145	164	122	135
S13_P10a_12_3	P10a	315	321	128	128	121	121	183	183	223	223	146	155	129	144	87	87	214	214	NA	NA	147	152	236	236	136	136	129	129	302	302	160	160	171	171	243	255	61	61	137	137	171	189	NA	NA	145	145	128	132
S13_P10a_14_1	P10a	315	324	128	131	121	121	180	183	223	223	155	159	129	140	NA	NA	214	214	69	73	NA	NA	NA	NA	121	121	NA	NA	302	302	160	163	177	177	NA	NA	61	61	139	139	170	170	222	222	145	150	132	135
S13_P10a_14_4	P10a	315	315	128	131	121	121	183	183	223	223	146	159	129	134	87	97	213	213	73	73	145	147	238	238	121	136	129	136	302	302	160	163	177	177	243	243	61	61	137	139	171	171	208	222	155	155	NA	NA
S13_P10a_28_3	P10a	315	315	128	128	121	121	177	177	NA	NA	146	146	NA	NA	87	87	214	214	NA	NA	NA	NA	NA	NA	136	139	129	129	302	302	160	163	162	168	255	255	NA	NA	137	137	171	198	208	219	NA	NA	132	135
S13_P10a_43_2	P10a	312	312	114	128	121	121	177	177	217	220	146	159	129	140	87	87	214	214	73	73	NA	NA	236	238	121	139	129	129	290	302	160	163	162	171	243	255	61	61	137	137	171	198	214	219	NA	NA	122	132
S13_P10a_9_4	P10a	321	321	131	131	NA	NA	177	180	223	223	146	159	129	137	87	87	214	214	69	73	145	147	236	236	121	139	129	129	302	302	160	160	162	162	243	249	61	61	137	139	171	171	208	214	NA	NA	132	132
S13_M8a_1_1	M8a	315	321	116	131	125	125	183	186	NA	NA	146	155	134	137	87	93	213	213	69	69	152	152	237	237	138	138	129	139	302	302	160	163	168	168	NA	NA	61	64	138	142	194	194	214	236	NA	NA	138	138
S13_M8a_13_4	M8a	315	315	122	128	121	125	180	180	197	220	146	146	137	137	87	95	NA	NA	69	69	NA	NA	238	238	139	155	129	129	290	302	160	160	165	168	249	249	61	64	138	138	185	185	214	214	NA	NA	132	138
S13_M8a_13A_3	M8a	315	315	128	128	121	125	NA	NA	197	197	146	146	137	137	95	95	213	213	69	69	NA	NA	232	232	155	155	129	129	290	302	160	160	168	168	249	251	NA	NA	138	140	185	185	NA	NA	155	157	NA	NA
S13_M8a_18_1	M8a	315	324	128	128	121	125	186	186	217	220	146	146	137	146	87	95	223	223	69	69	154	154	NA	NA	138	138	129	129	302	302	163	163	168	168	251	251	64	64	140	140	167	167	214	217	155	155	NA	NA
S13_M8a_31_1	M8a	315	315	128	128	121	125	183	186	197	197	146	157	134	134	NA	NA	NA	NA	69	69	147	152	238	238	142	155	129	129	302	302	160	160	165	165	249	249	61	64	138	138	170	194	219	219	NA	NA	NA	NA
S13_M8a_31_3	M8a	315	315	128	128	125	125	NA	NA	197	197	146	146	134	146	87	87	223	223	69	69	147	147	238	238	139	142	129	129	302	302	160	160	165	165	249	249	61	64	138	138	194	194	222	222	NA	NA	NA	NA
S13_M8a_38_3	M8a	308	308	128	131	125	125	171	183	197	197	146	146	134	144	80	87	211	213	69	69	145	156	238	238	139	155	129	129	290	302	160	160	165	165	243	249	64	64	NA	NA	NA	NA	NA	NA	157	157	NA	NA
S13_M8a_43_4	M8a	321	321	111	128	NA	NA	NA	NA	220	220	146	146	125	140	87	87	213	213	78	78	NA	NA	NA	NA	142	142	129	139	302	302	171	171	168	168	249	249	NA	NA	138	138	194	194	NA	NA	NA	NA	132	132
S13_M8a_43A_1	M8a	315	321	111	111	129	129	180	180	220	220	146	146	NA	NA	NA	NA	213	213	69	78	NA	NA	NA	NA	103	142	129	139	302	302	171	171	168	168	249	249	64	64	138	138	194	194	214	214	157	164	132	142
S13_P2b_1_3	P2b	312	312	119	128	129	129	183	183	209	209	159	168	134	134	NA	NA	156	156	69	69	NA	NA	236	236	139	139	150	150	290	302	163	171	159	165	255	255	61	61	138	138	171	171	214	219	145	145	132	135
S13_P2b_21_1	P2b	321	321	114	131	121	125	183	186	220	220	156	159	132	139	101	101	209	214	69	69	147	147	238	238	139	139	129	129	290	302	163	171	165	165	240	243	61	64	138	142	167	167	NA	NA	NA	NA	135	135
S13_P2b_21_4	P2b	321	321	131	131	121	125	183	183	220	220	156	156	132	132	97	97	209	209	73	73	147	147	238	238	139	139	129	129	290	290	171	171	159	165	243	246	64	64	138	142	204	204	NA	NA	155	155	135	135
S13_P2b_25_2	P2b	315	321	114	119	129	129	NA	NA	NA	NA	159	159	132	132	97	97	209	214	69	69	NA	NA	236	238	139	139	129	129	290	302	163	163	159	165	255	255	61	61	136	136	167	171	214	214	NA	NA	NA	NA
S13_P2b_28_3	P2b	321	321	114	114	125	129	183	183	188	209	156	159	132	134	97	97	156	211	69	69	145	152	238	240	139	139	129	129	290	302	160	163	165	171	246	255	64	64	136	136	171	171	NA	NA	157	164	132	132
S13_P2b_34_1	P2b	312	312	131	131	129	129	183	183	217	220	159	159	126	141	97	97	214	214	69	69	164	164	238	238	142	142	129	129	302	302	163	163	159	165	246	255	64	64	138	138	167	171	214	214	NA	NA	135	135
S13_P2b_6_3	P2b	321	321	114	131	121	129	183	183	220	220	159	159	139	141	97	101	211	223	73	73	147	152	236	236	139	139	129	129	302	302	160	163	165	165	255	255	64	64	136	144	171	189	NA	NA	155	155	132	132
S13_P5b_12_1	P5b	315	321	116	116	125	125	183	186	188	188	146	146	141	146	80	83	213	213	78	78	152	152	239	239	142	142	136	136	290	290	154	154	165	168	246	246	64	64	136	136	167	167	NA	NA	150	158	132	132
S13_P5b_19_2	P5b	318	324	128	131	121	121	183	183	223	223	151	155	NA	NA	97	97	165	223	73	73	NA	NA	236	236	142	142	NA	NA	290	290	160	174	NA	NA	246	249	61	64	137	137	167	167	208	231	NA	NA	NA	NA
S13_P5b_32_3	P5b	308	321	128	131	NA	NA	183	183	NA	NA	155	159	NA	NA	83	97	144	214	66	69	NA	NA	238	238	142	142	129	145	302	302	171	171	165	168	246	246	NA	NA	138	142	167	167	214	219	NA	NA	132	135
S13_P5b_8_1	P5b	315	340	125	131	121	121	183	186	217	220	146	159	141	145	NA	NA	214	214	NA	NA	NA	NA	NA	NA	139	146	129	150	290	302	157	163	165	168	234	246	61	64	NA	NA	167	167	214	226	150	158	132	135
S13_P5b_8_4	P5b	318	318	125	128	125	125	183	183	217	217	146	151	NA	NA	87	97	215	221	69	69	147	156	236	239	142	146	136	145	290	290	163	163	165	165	240	240	61	64	136	138	167	171	219	226	145	155	NA	NA
S13_P6b_13_1	P6b	321	340	125	128	117	121	183	183	220	220	155	159	NA	NA	97	97	218	220	73	78	NA	NA	NA	NA	142	142	NA	NA	290	302	148	160	165	171	240	249	61	61	136	142	167	167	NA	NA	145	155	NA	NA
S13_P6b_13_3	P6b	321	321	128	131	121	121	183	183	188	217	146	159	140	140	97	97	223	223	69	69	147	147	235	235	146	146	129	129	302	302	160	163	NA	NA	249	251	61	61	137	142	167	167	214	219	NA	NA	132	132
S13_P6b_14_3	P6b	303	315	128	128	117	121	171	183	NA	NA	151	151	140	140	NA	NA	144	214	NA	NA	NA	NA	232	237	139	142	129	129	290	290	160	174	164	168	249	254	61	64	137	140	167	181	NA	NA	NA	NA	NA	NA
S13_P6b_3_1	P6b	321	321	128	131	121	121	174	183	NA	NA	155	159	134	141	93	101	214	214	73	73	NA	NA	NA	NA	139	142	136	136	302	302	148	160	159	174	249	249	61	64	137	142	167	167	NA	NA	155	155	132	135
S13_P6b_3_2	P6b	321	324	111	128	121	121	NA	NA	220	220	159	172	134	134	97	101	199	199	73	73	145	164	NA	NA	139	142	129	136	290	302	148	160	165	165	240	249	NA	NA	140	142	167	167	214	219	NA	NA	135	135
S13_P6b_9_1	P6b	321	321	116	131	125	125	183	186	220	220	159	159	141	141	97	97	214	214	73	78	NA	NA	237	237	127	139	129	136	290	290	148	148	165	165	240	243	61	61	137	137	167	167	214	219	NA	NA	132	135
S13_P6b_9_3	P6b	321	321	119	128	125	125	174	186	220	220	159	159	134	141	83	97	214	214	NA	NA	NA	NA	234	237	127	139	129	136	290	302	148	163	NA	NA	240	243	61	61	134	137	NA	NA	NA	NA	145	150	135	142
S13_P3b_15_1	P3b	315	324	116	128	125	129	183	186	217	220	155	159	140	144	87	97	214	219	69	69	147	160	240	240	142	142	129	129	302	302	157	169	168	171	249	249	61	64	137	144	167	167	NA	NA	155	155	132	135
S13_P3b_17_2	P3b	321	324	128	128	125	125	NA	NA	NA	NA	167	167	146	146	83	83	179	179	78	78	147	152	NA	NA	142	142	129	134	302	302	157	157	180	180	245	249	61	61	142	142	173	173	NA	NA	155	155	135	135
S13_P3b_17_4	P3b	321	324	116	116	125	129	186	186	NA	NA	167	167	141	146	83	93	179	214	78	78	147	152	238	238	142	142	129	129	302	302	163	163	171	180	249	249	61	61	142	142	173	173	NA	NA	155	155	135	135
S13_P3b_25_1	P3b	321	321	116	116	129	129	NA	NA	188	188	155	159	136	136	NA	NA	214	214	69	69	152	156	239	239	139	142	129	129	302	302	157	157	165	165	237	245	61	61	137	137	167	189	NA	NA	145	155	132	132
S13_P3b_26_1	P3b	312	315	116	116	125	125	183	186	217	217	155	155	136	140	NA	NA	214	214	69	69	NA	NA	238	238	139	142	134	134	302	302	157	157	171	171	245	245	61	64	137	137	167	167	238	238	150	155	122	138
S13_P3b_26_3	P3b	315	315	116	128	121	125	186	186	220	223	155	155	136	140	87	95	214	214	69	69	147	152	236	239	139	142	134	134	302	302	157	157	165	171	249	249	61	61	137	142	167	185	NA	NA	150	155	135	135
S13_P3b_27_1	P3b	315	315	122	122	125	129	183	183	220	220	155	155	134	141	NA	NA	219	219	73	73	160	160	236	240	130	130	129	129	302	302	166	169	165	171	245	249	61	64	142	142	167	167	NA	NA	155	155	132	132
S13_P3b_27_4	P3b	315	315	122	122	125	125	NA	NA	220	220	155	155	134	134	NA	NA	NA	NA	69	73	160	160	236	240	130	130	129	129	302	302	166	169	171	171	245	249	61	61	NA	NA	167	173	214	214	NA	NA	132	132
S13_P3b_36_3	P3b	324	324	116	116	125	125	NA	NA	223	223	NA	NA	140	144	87	97	214	214	69	69	160	160	236	240	142	142	129	129	302	302	163	163	165	165	245	249	61	61	137	142	167	167	234	234	NA	NA	132	135
S13_P3b_36B_4	P3b	315	315	116	128	125	125	NA	NA	188	217	152	156	134	144	87	97	214	214	69	78	147	152	232	232	142	142	129	134	302	302	157	169	168	171	245	249	61	64	142	142	167	167	NA	NA	145	155	132	132
S13_P9b_1_1	P9b	308	318	131	131	121	121	183	183	217	220	159	167	NA	NA	86	86	214	217	69	78	NA	NA	NA	NA	110	142	129	129	290	302	157	163	165	168	245	255	61	61	NA	NA	167	167	214	219	150	155	NA	NA
S13_P9b_1_2	P9b	308	308	128	131	122	122	183	183	217	220	159	167	143	146	87	87	214	217	69	69	NA	NA	NA	NA	110	136	129	150	290	302	157	163	165	174	245	249	61	61	NA	NA	167	189	214	219	150	156	NA	NA
S13_P9b_11_2	P9b	308	315	128	131	125	125	NA	NA	NA	NA	155	167	134	143	82	82	123	213	69	69	150	152	236	238	121	121	NA	NA	290	290	157	163	165	174	246	246	61	61	137	139	167	189	214	219	155	158	NA	NA
S13_P9b_12_4	P9b	315	315	119	128	121	125	186	186	220	223	155	155	NA	NA	78	82	170	217	69	69	NA	NA	238	238	142	146	129	129	290	290	157	157	165	165	NA	NA	61	61	NA	NA	173	212	219	222	NA	NA	132	132
S13_P9b_18_2	P9b	315	315	128	128	127	127	186	186	NA	NA	155	155	141	141	82	97	173	173	69	69	159	159	NA	NA	142	142	129	129	290	290	157	157	174	174	243	251	61	64	NA	NA	171	173	231	231	150	155	132	132
S13_P9b_19_3	P9b	315	318	116	131	121	121	183	183	217	220	159	170	134	146	78	97	213	217	69	69	152	172	238	238	121	142	129	129	302	302	157	160	159	165	245	251	NA	NA	137	140	167	210	214	214	150	155	135	142
S13_P9b_24_3	P9b	308	315	116	131	121	125	186	186	217	217	155	167	134	146	NA	NA	134	214	69	69	NA	NA	NA	NA	121	142	129	129	302	302	157	163	NA	NA	251	255	61	61	NA	NA	192	210	NA	NA	156	164	132	135
S13_M7b_22_1	M7b	315	315	128	128	121	125	171	174	217	217	146	146	136	136	86	86	196	196	69	69	NA	NA	236	238	139	142	129	139	302	302	160	166	NA	NA	243	251	64	64	140	140	185	192	NA	NA	NA	NA	132	132
S13_M7b_6_2	M7b	321	324	131	131	127	127	183	186	212	217	155	171	140	140	87	87	223	223	69	69	NA	NA	NA	NA	121	136	129	129	302	302	163	163	NA	NA	243	243	61	61	NA	NA	185	185	214	214	NA	NA	NA	NA
S13_M7b_6_4	M7b	321	321	131	131	121	125	171	186	212	217	155	155	134	136	86	86	196	196	69	69	NA	NA	NA	NA	136	139	129	129	302	302	163	171	165	168	NA	NA	61	61	137	142	173	185	214	214	155	158	NA	NA
S13_M7b_7B_4	M7b	321	321	128	128	125	125	177	186	212	217	146	167	134	134	86	95	217	217	69	69	145	152	NA	NA	121	136	129	129	290	302	163	171	168	171	NA	NA	61	64	NA	NA	NA	NA	214	217	155	155	132	132
S13_M7b_8_1	M7b	315	321	NA	NA	121	125	171	183	217	217	146	151	137	140	86	86	213	213	69	69	152	182	238	238	138	142	129	129	NA	NA	163	166	165	171	243	255	61	73	NA	NA	173	185	214	217	NA	NA	132	135
S13_P1a_12_3	P1a	315	321	131	131	121	129	183	183	220	220	155	155	129	129	87	87	150	217	69	79	152	152	240	240	136	136	129	129	302	302	163	163	159	174	NA	NA	61	61	NA	NA	189	189	219	219	NA	NA	122	135
S13_P1a_12_4	P1a	321	321	128	131	121	121	183	186	220	220	155	159	143	143	87	87	150	214	79	79	NA	NA	240	240	136	139	129	150	290	302	163	163	174	174	NA	NA	61	64	NA	NA	NA	NA	219	219	158	158	122	128
S13_P1a_18_2	P1a	308	308	128	131	121	129	183	183	220	220	159	159	129	129	87	87	214	214	73	79	152	152	240	240	136	136	129	150	302	302	163	163	174	177	255	255	61	61	137	137	189	189	219	219	157	157	122	135
S13_P1a_18_4	P1a	308	321	131	131	129	129	183	186	220	220	155	159	129	129	87	87	214	217	NA	NA	152	152	240	240	139	149	129	150	NA	NA	157	157	174	177	255	255	61	64	NA	NA	189	189	219	219	156	156	122	142
S13_P1a_25_3	P1a	321	324	NA	NA	NA	NA	NA	NA	220	220	155	159	NA	NA	87	97	NA	NA	NA	NA	152	152	235	240	NA	NA	NA	NA	NA	NA	NA	NA	NA	NA	NA	NA	61	64	NA	NA	NA	NA	NA	NA	NA	NA	122	128
S13_P1a_27_3	P1a	321	321	128	131	122	122	183	183	220	220	159	159	129	154	87	87	214	214	NA	NA	152	152	238	240	136	136	129	150	302	302	163	163	159	165	246	255	61	61	NA	NA	167	189	219	219	155	158	128	142
S13_P1a_31_3	P1a	308	308	128	131	121	121	183	183	217	220	159	167	143	146	87	87	214	217	69	69	152	172	NA	NA	NA	NA	129	150	290	302	157	163	165	174	245	249	61	61	NA	NA	167	189	214	219	NA	NA	NA	NA
S13_P1a_31_4	P1a	321	321	131	131	121	121	186	186	NA	NA	159	159	129	143	87	87	214	214	69	73	152	152	240	240	136	139	129	150	302	302	157	163	174	174	255	255	61	61	NA	NA	189	189	219	219	156	156	121	135
S13_P1a_4_2	P1a	321	321	128	131	121	121	183	183	220	220	159	159	123	154	87	87	214	217	69	78	152	152	NA	NA	136	139	129	129	302	302	163	163	174	174	255	255	61	64	NA	NA	189	189	219	219	156	156	128	135
S13_P9a_10_1	P9a	315	315	128	128	121	129	183	183	215	217	155	163	141	145	83	87	159	159	69	69	150	159	NA	NA	121	139	129	129	302	302	157	157	165	165	NA	NA	NA	NA	137	140	189	189	214	222	145	155	132	135
S13_P9a_30_2	P9a	321	321	122	128	128	128	183	183	188	220	163	167	140	154	87	87	159	217	73	78	150	159	236	236	139	142	129	129	290	302	157	157	168	171	252	252	61	64	139	139	189	192	214	214	155	158	NA	NA
S13_P9a_38_2	P9a	308	315	128	128	129	129	180	183	188	217	163	163	136	145	83	87	153	209	73	78	137	159	238	238	121	139	129	129	NA	NA	157	163	159	171	240	249	61	64	137	140	188	188	222	231	145	155	135	142
S13_P9a_4_4	P9a	321	321	128	128	128	128	177	177	217	217	146	155	145	145	87	87	153	153	73	73	150	150	NA	NA	121	139	129	129	290	302	157	163	165	165	249	249	64	64	NA	NA	171	171	214	222	NA	NA	NA	NA
S13_P9a_42_2	P9a	315	321	128	128	121	129	183	186	215	217	155	167	129	136	83	83	153	159	73	73	150	159	238	238	139	139	129	129	302	302	157	157	165	171	240	240	61	64	NA	NA	189	189	214	222	NA	NA	122	135
S13_P9a_6_2	P9a	318	321	122	122	130	130	183	183	220	226	147	155	141	141	83	87	153	218	73	73	NA	NA	236	236	121	121	129	129	302	302	157	163	165	174	249	249	64	64	NA	NA	188	192	214	214	145	158	135	148
S13_P9a_9_1	P9a	308	315	116	128	129	129	180	183	197	220	155	159	140	140	83	87	162	209	69	69	150	159	236	236	142	142	129	129	290	290	157	163	159	165	NA	NA	61	64	137	140	167	192	231	231	NA	NA	NA	NA
S13_P9a_9_2	P9a	308	315	116	128	129	129	180	183	197	220	155	159	140	140	83	87	162	209	69	69	150	159	236	236	142	142	129	129	290	302	157	163	159	165	240	249	61	76	NA	NA	167	192	231	231	155	155	122	122
S13_P9a_9_4	P9a	315	315	131	131	131	131	180	186	217	220	146	146	129	141	87	87	215	215	73	73	NA	NA	237	237	121	139	129	129	290	302	157	163	159	165	240	249	61	76	NA	NA	167	188	214	222	155	155	122	135
S13_M6a_10B_4	M6a	315	321	125	128	121	125	171	186	197	220	146	159	129	134	87	97	213	217	69	69	NA	NA	235	238	121	142	129	129	302	302	163	163	165	168	255	255	61	64	137	139	189	189	214	226	155	158	NA	NA
S13_M6a_12B_4	M6a	315	321	111	111	121	125	183	183	209	209	146	146	134	137	87	93	NA	NA	69	69	150	156	235	235	142	146	129	129	302	302	163	163	159	168	NA	NA	64	64	140	140	194	194	217	226	NA	NA	132	132
S13_M6a_2_1	M6a	315	321	116	131	125	125	183	183	220	220	146	146	129	137	87	87	195	213	69	69	150	150	238	242	142	142	129	129	290	302	163	163	159	168	245	249	61	61	NA	NA	189	189	214	214	NA	NA	132	132
S13_M6a_3_3	M6a	321	321	116	128	121	125	183	183	217	220	NA	NA	134	134	87	87	NA	NA	69	69	NA	NA	237	237	138	138	129	145	290	302	160	163	165	168	243	249	64	64	138	140	NA	NA	NA	NA	150	155	125	138
S13_M6a_5A_3	M6a	321	321	111	111	120	124	177	183	209	209	146	146	134	134	93	93	NA	NA	69	69	NA	NA	235	238	142	146	129	139	290	302	160	163	159	168	245	265	64	64	NA	NA	NA	NA	219	226	155	158	132	132
S13_M6a_5B_2	M6a	321	321	111	128	120	120	183	183	220	220	146	167	134	134	80	87	195	217	69	69	NA	NA	235	242	139	142	129	139	290	302	160	163	159	168	245	251	64	64	NA	NA	189	192	219	219	145	155	132	135
S13_M6a_8A_2	M6a	321	321	111	128	125	125	174	174	220	220	146	146	129	129	87	87	196	196	69	69	152	152	NA	NA	133	146	129	139	302	302	163	163	168	168	245	245	61	64	NA	NA	194	194	219	219	155	157	132	132
S13_M6a_9_1	M6a	315	321	NA	NA	125	125	NA	NA	217	220	NA	NA	129	137	87	95	NA	NA	69	69	NA	NA	235	237	138	138	129	139	302	302	163	163	165	168	243	249	61	64	137	142	NA	NA	214	222	150	155	NA	NA
S13_P10a_10_4	P10a	315	315	131	131	121	121	177	183	NA	NA	146	159	137	140	87	87	214	214	73	73	NA	NA	NA	NA	136	142	129	129	302	302	163	163	162	171	243	249	61	61	NA	NA	171	189	219	219	NA	NA	135	142
S13_P10a_12_2	P10a	312	321	128	128	122	122	180	180	217	223	146	159	129	129	87	87	214	214	69	73	NA	NA	236	238	136	142	129	129	290	302	160	163	162	165	255	255	61	61	NA	NA	171	189	214	219	145	155	121	132
S13_P10a_12_4	P10a	315	321	128	128	121	121	180	180	223	223	155	159	129	144	87	87	214	214	73	73	147	152	236	236	136	139	129	129	302	302	160	160	162	162	243	243	61	61	NA	NA	171	171	214	219	150	150	122	132
S13_P10a_14_2	P10a	315	315	114	131	121	121	180	183	223	223	159	159	140	144	87	97	214	214	73	73	150	152	236	236	136	139	129	129	302	302	160	163	177	177	243	249	61	61	NA	NA	171	171	214	222	145	155	132	135
S13_P10a_28_4	P10a	305	315	116	131	122	122	183	183	223	223	155	166	137	146	87	97	NA	NA	69	69	147	147	NA	NA	136	142	129	129	302	302	157	163	171	174	243	249	61	76	NA	NA	189	198	208	222	145	145	125	135
S13_P10a_6_2	P10a	315	315	128	128	121	121	177	180	NA	NA	146	146	129	129	87	87	214	214	73	73	147	152	NA	NA	136	139	129	129	302	302	160	163	NA	NA	243	255	61	61	137	139	NA	NA	208	214	145	156	132	135
S13_P10a_6_4	P10a	315	315	131	131	121	121	177	183	223	226	159	170	129	144	NA	NA	214	214	73	73	NA	NA	236	238	139	139	129	129	302	302	163	163	162	162	240	255	61	61	137	139	171	171	214	219	155	155	135	135
S13_M8a_18_3	M8a	321	321	116	128	121	125	183	183	NA	NA	NA	NA	134	134	87	87	213	213	69	69	NA	NA	237	237	138	138	129	145	NA	NA	NA	NA	165	168	243	249	61	64	138	138	NA	NA	NA	NA	NA	NA	125	138
S13_M8a_18A_2	M8a	315	321	NA	NA	121	125	NA	NA	217	220	NA	NA	NA	NA	87	95	NA	NA	69	69	NA	NA	235	237	138	138	129	139	302	302	163	163	165	168	243	249	61	64	137	142	NA	NA	214	222	150	155	NA	NA
S13_M8a_1A_4	M8a	315	321	111	116	125	125	174	183	217	220	155	155	140	140	87	95	NA	NA	69	69	154	168	NA	NA	142	142	129	129	302	302	163	171	168	168	NA	NA	61	61	NA	NA	189	194	214	214	145	155	132	135
S13_M8a_29_2	M8a	324	324	111	111	125	125	177	177	220	220	146	146	137	137	87	87	214	214	69	69	147	152	232	232	130	142	129	129	290	302	163	171	165	165	249	249	61	64	139	141	189	189	214	219	150	150	132	132
S13_M8a_29A_4	M8a	324	324	111	111	125	125	177	186	NA	NA	146	146	137	137	87	87	NA	NA	69	69	147	152	232	232	130	142	129	129	290	302	163	171	165	165	249	249	61	64	138	140	189	189	214	214	150	150	132	132
S13_M8a_31B_4	M8a	308	315	128	131	125	125	183	186	197	197	146	146	134	144	80	87	NA	NA	69	69	147	156	238	238	139	142	129	129	302	302	160	160	165	174	243	249	61	64	138	140	170	194	214	219	155	155	132	132
S13_M8a_35A_3	M8a	315	315	128	128	121	125	174	180	197	217	146	146	134	137	87	87	NA	NA	69	69	152	168	238	238	139	155	129	129	NA	NA	160	160	165	168	249	249	61	61	NA	NA	185	194	219	219	150	150	NA	NA
S13_M8a_35B_4	M8a	315	315	111	128	125	125	174	180	197	220	146	146	140	146	87	89	213	213	69	69	152	168	238	238	139	155	129	129	NA	NA	160	160	165	165	243	249	61	64	137	140	194	194	219	222	NA	NA	132	138
S13_M8a_43_3	M8a	303	321	NA	NA	121	125	NA	NA	NA	NA	151	163	131	144	NA	NA	213	219	69	69	147	182	232	238	136	138	129	150	302	302	NA	NA	165	171	NA	NA	61	61	NA	NA	174	185	NA	NA	170	170	125	132
S13_P2b_1_2	P2b	321	321	114	114	129	129	183	183	NA	NA	159	159	126	132	97	101	209	209	69	69	147	164	236	236	139	142	129	150	290	302	151	163	159	165	NA	NA	61	61	138	144	171	171	214	214	145	157	NA	NA
S13_P2b_1_4	P2b	312	321	114	119	129	129	183	183	209	220	159	159	126	126	101	101	223	223	69	69	147	147	236	238	139	139	129	150	NA	NA	163	163	159	171	255	255	61	64	138	144	171	171	214	214	NA	NA	132	135
S13_P2b_12_2	P2b	321	321	114	131	125	129	183	183	NA	NA	156	167	129	134	97	101	156	156	69	69	147	152	238	238	139	139	129	150	302	302	163	163	159	165	246	255	64	64	NA	NA	167	167	214	214	145	157	132	135
S13_P2b_28_2	P2b	321	321	114	119	125	129	183	183	217	217	156	159	132	134	97	97	156	211	69	69	NA	NA	238	238	139	139	129	129	NA	NA	171	171	165	171	246	246	61	64	NA	NA	171	171	214	222	NA	NA	NA	NA
S13_P2b_28_4	P2b	321	321	114	119	125	129	183	183	188	209	156	159	132	132	97	97	156	211	69	69	164	164	238	240	139	139	129	129	290	290	169	171	165	165	246	255	64	64	136	138	171	189	214	226	145	157	132	132
S13_P2b_8_4	P2b	312	312	114	131	129	129	183	183	220	220	159	159	134	141	97	101	214	214	69	69	NA	NA	238	238	139	139	129	129	290	290	163	163	NA	NA	NA	NA	61	61	NA	NA	NA	NA	214	214	NA	NA	NA	NA
S13_P5b_22_4	P5b	315	321	114	131	121	121	183	183	217	220	155	159	132	145	83	97	214	214	69	69	145	166	NA	NA	127	142	129	136	290	302	154	174	NA	NA	246	249	61	64	NA	NA	167	171	214	217	NA	NA	132	135
S13_P5b_23_4	P5b	308	321	122	128	121	129	183	183	NA	NA	155	159	140	140	83	97	144	214	69	69	NA	NA	NA	NA	103	146	129	136	290	302	174	174	NA	NA	NA	NA	61	61	138	138	167	167	NA	NA	145	145	128	132
S13_P6b_13_4	P6b	321	324	NA	NA	NA	NA	180	183	220	220	155	159	NA	NA	87	97	NA	NA	NA	NA	152	152	235	240	NA	NA	NA	NA	NA	NA	NA	NA	NA	NA	NA	NA	61	64	NA	NA	NA	NA	NA	NA	164	164	NA	NA
S13_P6b_19_4	P6b	318	324	128	131	121	129	174	183	189	217	155	159	141	146	83	87	220	220	69	69	160	160	236	239	136	139	129	150	302	302	148	160	165	165	243	246	61	64	NA	NA	189	189	208	208	145	155	132	135
S13_P6b_21_1	P6b	315	321	122	128	120	128	183	183	189	220	159	163	129	146	78	93	NA	NA	73	78	NA	NA	235	235	133	142	129	139	302	302	160	163	NA	NA	243	255	61	64	NA	NA	167	189	211	214	150	150	NA	NA
S13_P6b_21_2	P6b	305	321	122	128	121	121	183	183	212	220	155	163	129	140	83	101	213	215	69	73	147	155	240	240	142	142	136	136	290	302	160	160	165	168	NA	NA	NA	NA	NA	NA	167	167	211	214	145	150	132	135
S13_P6b_31_1	P6b	321	321	111	128	122	122	183	183	189	223	159	159	134	140	97	101	185	215	66	73	147	152	235	239	139	142	129	139	290	302	163	163	165	171	240	240	61	64	NA	NA	167	181	214	238	155	158	NA	NA
S13_P6b_9_2	P6b	321	321	119	128	125	125	174	186	220	220	159	159	141	141	83	97	214	214	73	78	NA	NA	NA	NA	124	139	136	136	290	290	148	148	165	165	240	249	NA	NA	134	137	167	167	219	219	145	155	132	142
S13_P3b_14_1	P3b	315	315	116	122	125	125	183	186	NA	NA	155	155	136	136	87	97	214	220	69	69	156	160	NA	NA	139	142	129	129	302	302	157	157	NA	NA	NA	NA	61	61	138	142	167	167	208	234	155	155	132	132
S13_P3b_14_4	P3b	315	315	111	122	125	125	NA	NA	NA	NA	155	155	134	136	87	91	209	209	69	69	156	160	238	238	139	142	129	129	302	302	163	163	NA	NA	249	249	61	61	138	142	167	173	208	234	150	155	NA	NA
S13_P3b_15b_4	P3b	315	324	116	128	121	125	183	186	NA	NA	151	159	141	144	97	97	214	222	78	78	NA	NA	NA	NA	139	142	129	129	NA	NA	157	163	165	171	249	249	61	61	137	144	167	167	214	234	155	155	132	135
S13_P3b_16_4	P3b	321	324	116	116	125	130	186	186	188	217	155	159	134	140	91	93	214	219	78	78	152	156	236	239	139	142	129	129	302	302	157	163	159	171	240	249	61	61	NA	NA	167	192	214	219	150	155	NA	NA
S13_P3b_26_2	P3b	312	312	116	128	125	125	186	186	217	220	167	167	136	140	93	93	214	214	69	69	NA	NA	239	239	139	142	134	134	302	302	157	157	165	171	245	245	64	64	NA	NA	167	167	219	238	155	155	135	138
S13_P3b_27_2	P3b	315	315	122	128	125	129	171	183	217	220	151	159	134	136	91	93	156	214	69	69	147	160	236	236	139	142	129	134	302	302	157	169	158	171	249	249	61	64	142	142	173	173	234	234	NA	NA	132	132
S13_P3b_31B_3	P3b	315	324	116	128	125	125	183	183	217	220	151	155	136	146	87	97	214	214	73	73	NA	NA	NA	NA	142	142	129	134	290	302	157	163	NA	NA	NA	NA	61	61	NA	NA	NA	NA	214	214	145	155	132	132
C13_P9b_1_4	P9b	308	315	131	131	121	129	183	183	220	220	155	167	146	146	82	82	217	217	69	69	172	172	238	238	110	142	129	129	290	302	157	163	162	165	245	255	NA	NA	138	138	167	210	208	214	150	164	132	132
C13_P9b_11_2	P9b	308	315	128	131	121	121	183	186	NA	NA	159	167	143	143	87	97	190	214	69	69	NA	NA	NA	NA	NA	NA	129	136	290	302	NA	NA	NA	NA	246	252	61	61	NA	NA	171	173	219	219	150	158	NA	NA
C13_P9b_12_4	P9b	315	315	128	131	125	129	186	186	217	220	155	159	141	141	82	97	211	217	69	73	147	152	NA	NA	142	142	129	129	290	302	157	157	159	174	243	249	61	61	138	138	192	210	214	219	155	155	NA	NA
C13_P9b_18_4	P9b	315	315	128	131	121	125	186	186	NA	NA	NA	NA	141	141	97	97	173	196	69	69	NA	NA	NA	NA	NA	NA	129	129	290	290	154	157	162	162	243	251	61	61	137	137	171	173	231	231	NA	NA	132	132
C13_P9b_28_3	P9b	308	321	131	131	121	121	183	186	217	220	155	159	146	146	80	87	NA	NA	69	69	150	172	236	236	NA	NA	129	129	290	290	160	163	165	165	243	251	NA	NA	138	138	171	212	219	222	150	155	132	135
C13_M7b_19_4	M7b	315	321	128	128	121	125	183	186	217	217	167	171	131	138	86	93	NA	NA	69	69	147	152	238	238	139	139	129	129	290	302	NA	NA	165	165	234	249	61	61	142	142	185	192	214	217	155	155	NA	NA
C13_M7b_2_2	M7b	321	324	116	128	125	125	171	186	217	217	167	167	NA	NA	86	101	213	223	69	69	NA	NA	238	238	142	146	129	145	NA	NA	171	171	171	174	251	255	61	61	153	153	171	185	219	219	155	158	135	138
C13_M7b_2_4	M7b	315	321	125	128	125	125	171	186	217	217	151	167	131	131	86	86	196	223	69	69	172	172	238	238	NA	NA	129	129	302	302	166	171	165	171	251	255	61	73	142	142	167	185	219	219	155	158	NA	NA
C13_M7b_6_4	M7b	321	321	116	131	125	129	183	186	212	217	167	171	137	140	86	93	219	219	69	69	152	152	NA	NA	121	146	129	129	302	302	NA	NA	168	168	NA	NA	61	64	140	142	173	185	214	244	145	158	NA	NA
C13_M7b_8_2	M7b	315	321	NA	NA	121	125	171	186	217	217	NA	NA	140	140	86	86	NA	NA	69	69	147	152	238	238	NA	NA	129	129	302	302	163	171	171	171	243	255	61	73	140	142	185	189	217	219	NA	NA	132	138
C13_P1a_12_2	P1a	312	315	128	131	129	129	183	186	NA	NA	155	159	NA	NA	87	87	NA	NA	73	73	152	152	NA	NA	NA	NA	129	129	302	302	163	163	159	174	252	255	NA	NA	137	137	189	189	219	219	NA	NA	122	128
C13_P1a_16_2	P1a	312	321	128	128	121	129	183	183	220	220	NA	NA	129	154	87	87	150	214	73	79	152	152	240	240	NA	NA	129	129	302	302	157	163	174	174	255	255	NA	NA	137	137	189	189	219	228	NA	NA	135	142
C13_P1a_18_4	P1a	308	315	128	131	121	129	183	183	220	220	159	159	129	129	87	87	NA	NA	69	79	152	152	NA	NA	149	149	129	129	302	302	NA	NA	174	174	255	255	NA	NA	137	137	189	189	219	228	NA	NA	122	135
C13_P1a_25_4	P1a	321	321	131	131	121	129	NA	NA	220	220	159	159	129	129	87	87	NA	NA	NA	NA	152	152	240	240	NA	NA	150	150	290	302	157	163	174	174	255	255	61	64	137	137	189	189	219	219	NA	NA	128	128
C13_P1a_35_4	P1a	321	321	NA	NA	121	121	183	183	NA	NA	159	159	141	141	87	87	NA	NA	73	73	152	152	240	240	NA	NA	129	129	302	302	NA	NA	165	174	255	255	61	61	137	137	171	189	219	228	158	158	122	128
C13_P1a_4_2	P1a	321	321	128	128	121	121	183	186	220	220	NA	NA	NA	NA	87	87	214	217	78	78	152	152	238	240	NA	NA	129	150	302	302	157	157	159	174	255	255	NA	NA	NA	NA	189	189	219	219	156	156	122	135
C13_P9a_10_2	P9a	315	321	NA	NA	121	121	186	186	217	220	NA	NA	140	146	87	87	159	215	69	69	137	150	238	240	NA	NA	129	129	302	302	157	160	171	171	249	249	NA	NA	140	140	171	189	219	222	NA	NA	135	135
C13_P9a_11_3	P9a	321	321	128	131	129	129	180	186	197	217	NA	NA	136	140	83	87	NA	NA	73	73	150	159	237	237	139	142	129	129	290	302	NA	NA	165	165	240	240	61	64	140	140	189	189	214	214	NA	NA	122	135
C13_P9a_30_2	P9a	321	321	128	128	129	129	183	186	217	220	163	163	140	154	87	87	209	218	69	69	150	150	238	238	139	142	129	129	290	302	163	163	165	171	240	252	69	69	140	140	189	189	214	214	158	158	142	142
C13_P9a_4_4	P9a	315	321	NA	NA	129	129	177	186	NA	NA	155	159	145	145	83	87	NA	NA	69	69	147	152	NA	NA	139	142	129	129	302	302	148	157	165	165	249	249	NA	NA	NA	NA	192	192	214	222	NA	NA	122	132
C13_P9a_40_2	P9a	312	321	128	128	121	121	183	186	217	217	155	155	136	140	87	87	NA	NA	69	73	150	160	238	238	139	142	129	129	302	302	163	163	165	174	240	240	61	61	137	140	171	171	214	222	155	155	122	135
C13_P9a_5_3	P9a	318	331	128	131	121	129	183	186	220	220	163	163	140	140	87	87	159	213	69	73	150	159	238	238	NA	NA	129	129	302	302	157	157	165	165	249	249	NA	NA	137	137	188	188	214	222	145	158	122	122
C13_M6a_10_4	M6a	321	321	122	125	125	125	171	171	220	220	NA	NA	129	137	93	97	196	217	69	69	150	152	238	240	NA	NA	129	129	302	302	163	163	168	168	243	255	61	64	137	140	194	194	214	226	155	155	132	132
C13_M6a_11_2	M6a	321	321	NA	NA	121	125	183	183	197	197	NA	NA	134	134	87	87	NA	NA	69	69	145	168	235	235	NA	NA	129	129	302	302	163	163	165	168	265	265	61	64	142	142	189	189	217	217	NA	NA	132	132
C13_M6a_2_3	M6a	321	321	131	131	125	125	177	183	NA	NA	146	146	129	129	87	87	213	213	69	69	156	156	238	242	142	142	129	129	290	290	163	163	159	159	249	249	69	69	138	138	192	192	214	219	155	155	132	132
C13_M6a_2_4	M6a	315	321	116	131	125	125	177	183	NA	NA	146	146	129	137	87	87	195	195	69	69	150	150	235	242	138	138	129	150	290	302	163	163	NA	NA	243	249	NA	NA	138	138	189	189	214	222	NA	NA	132	132
C13_P10a_10_3	P10a	321	324	128	131	121	121	180	183	223	223	159	159	137	140	87	87	NA	NA	73	73	147	147	232	238	NA	NA	129	129	302	302	160	160	171	171	240	255	61	61	137	140	198	210	208	208	145	155	125	135
C13_P10a_11_2	P10a	315	315	128	128	121	121	177	180	217	223	NA	NA	129	146	87	95	NA	NA	69	73	145	147	236	238	136	142	129	129	302	302	160	163	165	171	255	255	61	61	137	137	170	189	208	214	145	158	132	135
C13_P10a_12_2	P10a	315	315	128	128	121	121	180	183	223	223	146	159	129	144	87	87	NA	NA	69	73	147	147	236	236	NA	NA	129	129	302	302	160	163	162	177	249	255	61	61	137	137	171	198	214	219	NA	NA	132	135
C13_P10a_22_3	P10a	315	315	128	128	121	121	177	180	NA	NA	NA	NA	129	144	87	87	NA	NA	69	73	145	147	236	236	NA	NA	129	129	302	302	160	160	162	177	249	249	61	64	137	137	189	192	209	214	145	145	132	142
C13_P10a_39_4	P10a	315	315	131	131	121	121	177	180	223	223	155	159	129	129	97	101	NA	NA	69	73	147	152	236	236	121	139	129	129	302	302	160	163	162	162	249	255	NA	NA	137	137	171	189	208	222	145	155	122	135
C13_P10a_6_2	P10a	315	321	114	131	121	121	177	183	NA	NA	146	159	134	134	87	97	NA	NA	69	73	145	152	NA	NA	121	139	129	129	302	302	160	163	171	177	240	243	61	61	137	137	171	171	219	231	150	158	135	135
C13_P10a_6_4	P10a	321	321	128	128	129	129	183	183	197	197	146	155	140	140	NA	NA	153	153	69	78	147	150	237	237	NA	NA	129	129	302	302	160	163	159	165	249	261	NA	NA	137	137	192	210	222	231	NA	NA	122	132
C13_M8a_1_3	M8a	315	321	116	128	125	125	186	186	217	217	151	155	140	140	87	95	223	223	69	69	168	168	233	239	NA	NA	129	139	302	302	160	163	168	168	249	251	61	61	138	140	194	194	214	217	150	157	135	135
C13_M8a_1_4	M8a	315	321	116	116	125	129	174	186	NA	NA	146	155	134	140	95	95	NA	NA	69	69	154	168	NA	NA	NA	NA	129	139	302	302	160	163	168	168	249	251	61	61	138	138	189	194	214	214	NA	NA	132	135
C13_M8a_13_2	M8a	315	315	122	128	121	121	180	180	197	220	NA	NA	137	137	87	95	NA	NA	69	69	147	156	NA	NA	NA	NA	129	129	290	302	160	171	168	168	249	249	61	64	138	140	185	185	214	214	NA	NA	132	132
C13_M8a_13_4	M8a	315	321	128	128	121	125	180	183	197	197	146	159	137	137	87	95	213	213	69	69	147	156	238	238	139	155	129	129	290	302	160	171	165	168	249	249	61	61	138	140	185	194	214	219	NA	NA	135	138
C13_M8a_21_2	M8a	315	315	NA	NA	125	125	183	186	217	220	NA	NA	134	134	93	93	213	219	69	73	150	159	NA	NA	NA	NA	129	129	290	302	NA	NA	165	168	249	249	64	64	NA	NA	194	194	214	231	157	157	132	135
C13_M8a_31_4	M8a	308	315	128	131	125	125	183	186	197	197	NA	NA	144	146	87	95	NA	NA	69	69	147	152	238	238	NA	NA	129	129	290	302	160	160	165	174	243	249	61	61	138	140	185	194	214	219	NA	NA	NA	NA
C13_M8a_35_3	M8a	315	315	128	128	121	125	174	186	217	220	146	146	134	146	87	95	213	213	69	69	168	168	238	238	NA	NA	129	139	302	302	160	163	165	168	249	249	64	64	NA	NA	194	194	219	222	NA	NA	NA	NA
C13_P2b_1_4	P2b	312	312	NA	NA	125	129	183	183	NA	NA	NA	NA	NA	NA	101	101	NA	NA	69	73	NA	NA	236	236	136	142	NA	NA	290	302	151	163	159	165	255	255	61	61	138	144	167	171	214	214	NA	NA	NA	NA
C13_P2b_25_3	P2b	315	321	114	119	125	129	183	183	217	220	NA	NA	132	141	97	97	214	214	69	69	NA	NA	238	238	138	138	129	129	290	302	151	163	159	165	255	255	64	64	140	140	171	171	214	226	145	157	135	135
C13_P2b_8_2	P2b	312	312	NA	NA	129	129	183	183	217	220	159	159	126	126	97	101	NA	NA	69	69	147	164	238	238	NA	NA	129	150	302	302	163	163	165	168	255	255	61	61	138	138	171	171	214	214	157	157	135	135
C13_P5b_12_2	P5b	321	321	NA	NA	125	125	186	186	188	220	146	151	133	146	83	97	NA	NA	69	69	NA	NA	233	237	NA	NA	129	136	290	290	154	157	165	165	246	255	61	61	NA	NA	167	189	211	214	145	158	132	132
C13_P5b_14_3	P5b	294	305	NA	NA	125	125	183	186	188	217	NA	NA	137	141	88	101	218	218	69	69	NA	NA	NA	NA	139	142	129	136	290	302	157	160	159	162	240	255	61	61	NA	NA	167	171	211	211	150	155	NA	NA
C13_P5b_23_4	P5b	308	321	128	131	121	129	183	186	217	223	NA	NA	137	137	78	83	214	214	69	69	147	166	NA	NA	NA	NA	129	136	290	290	157	174	165	165	243	249	61	61	NA	NA	167	167	219	219	145	155	132	132
C13_P5b_26_1	P5b	315	321	125	128	121	129	183	183	220	223	146	159	129	145	83	97	214	220	69	69	NA	NA	232	238	139	139	136	150	302	302	154	160	165	165	255	255	64	64	NA	NA	167	171	214	217	NA	NA	132	135
C13_P6b_13_4	P6b	321	321	122	128	121	125	NA	NA	NA	NA	146	159	140	140	88	101	168	220	69	69	147	147	238	240	139	142	129	139	290	302	NA	NA	NA	NA	240	243	61	61	134	142	167	167	208	219	NA	NA	NA	NA
C13_P6b_9_4	P6b	321	324	119	131	125	129	183	183	189	220	NA	NA	141	141	83	97	199	214	69	69	152	152	235	235	NA	NA	136	139	290	302	160	163	165	165	249	249	64	64	134	141	167	181	NA	NA	NA	NA	135	142
C13_P3b_14_2	P3b	324	324	NA	NA	125	125	NA	NA	220	220	155	159	136	136	87	87	209	214	69	69	NA	NA	238	238	139	142	129	129	302	302	157	163	171	171	249	249	61	61	138	142	167	167	208	234	NA	NA	132	135
C13_P3b_16_4	P3b	315	315	116	131	125	125	186	186	188	188	155	155	140	140	93	93	NA	NA	69	69	152	156	239	239	139	142	129	129	302	302	160	160	159	171	243	249	61	61	NA	NA	173	192	219	226	NA	NA	135	138
C13_P3b_17_3	P3b	321	324	116	128	121	129	183	186	NA	NA	155	159	NA	NA	83	91	214	214	NA	NA	147	147	238	238	NA	NA	129	129	302	302	157	157	171	171	249	249	61	64	NA	NA	167	167	NA	NA	150	155	132	135
C13_P3b_31_4	P3b	321	324	116	128	125	125	171	183	217	220	146	156	144	146	93	93	NA	NA	73	73	147	152	NA	NA	NA	NA	129	134	302	302	163	169	NA	NA	249	249	61	61	NA	NA	167	167	214	214	NA	NA	NA	NA
S13_P9b_25_3	P9b	315	321	116	131	121	121	183	186	223	223	NA	NA	134	146	82	82	NA	NA	69	69	152	152	NA	NA	142	142	129	129	290	290	163	163	165	165	243	243	61	61	138	138	173	192	219	222	145	156	NA	NA
S13_P9b_28_4	P9b	308	315	NA	NA	121	121	183	183	220	223	146	146	146	146	78	80	NA	NA	69	69	NA	NA	238	238	142	142	129	129	290	302	157	163	165	165	249	249	61	61	NA	NA	NA	NA	214	219	NA	NA	132	132
S13_M7b_1_4	M7b	315	321	NA	NA	121	125	174	183	NA	NA	146	151	136	136	87	97	196	196	69	69	150	159	238	238	NA	NA	129	129	302	302	160	163	165	168	243	243	61	61	137	142	167	167	214	217	155	155	NA	NA
S13_M7b_12_4	M7b	315	315	116	131	122	122	171	186	217	217	NA	NA	136	136	86	95	196	196	69	69	152	152	238	238	NA	NA	129	145	302	302	166	171	165	168	243	243	61	64	NA	NA	185	185	214	214	155	158	132	135
S13_M7b_8_2	M7b	321	324	NA	NA	125	125	186	186	217	217	NA	NA	136	140	86	86	196	196	NA	NA	NA	NA	238	238	NA	NA	129	145	302	302	163	166	168	171	243	246	61	73	140	142	185	185	214	219	145	145	NA	NA
S13_P1a_16_2	P1a	321	321	131	131	121	129	186	186	220	220	NA	NA	143	154	87	87	217	217	69	78	152	152	238	240	136	136	129	150	302	302	157	163	174	174	255	255	61	61	137	137	189	189	219	219	157	157	NA	NA
S13_P9a_11A_4	P9a	315	318	NA	NA	121	129	180	186	217	223	NA	NA	136	146	83	87	162	218	73	73	150	150	237	237	NA	NA	129	129	302	302	163	163	165	165	NA	NA	61	61	140	140	188	188	214	222	145	155	122	135
S13_P9a_4_3	P9a	315	315	NA	NA	129	129	177	180	NA	NA	146	155	141	145	87	87	153	209	69	69	150	159	NA	NA	121	136	129	129	302	302	148	157	159	165	249	249	61	61	140	140	171	192	214	214	NA	NA	122	122
S13_P9a_40_2	P9a	321	321	NA	NA	121	121	183	183	NA	NA	NA	NA	136	145	83	87	NA	NA	69	69	150	150	238	238	NA	NA	129	129	302	302	NA	NA	165	171	240	240	61	64	137	140	171	189	214	222	155	158	NA	NA
S13_P9a_40_3	P9a	312	321	NA	NA	121	121	NA	NA	217	217	NA	NA	140	140	87	87	220	220	73	73	150	160	238	238	136	139	129	129	302	302	163	163	165	174	249	249	61	61	137	140	171	171	214	222	155	155	NA	NA
S13_M6a_3_2	M6a	321	321	119	128	125	125	183	183	220	220	NA	NA	129	137	87	93	173	196	69	69	145	152	NA	NA	NA	NA	129	139	290	302	163	163	165	165	NA	NA	64	64	140	140	167	194	214	219	145	150	NA	NA
S13_M6a_6A_4	M6a	321	321	NA	NA	125	129	183	183	NA	NA	159	159	126	132	101	101	156	156	69	69	164	164	238	238	142	142	129	129	302	302	163	163	165	165	255	255	NA	NA	144	144	171	171	214	214	NA	NA	135	135
S13_M6a_9_2	M6a	315	315	NA	NA	121	121	183	186	NA	NA	NA	NA	129	137	87	95	156	196	69	69	NA	NA	NA	NA	NA	NA	139	150	290	302	163	163	165	168	NA	NA	61	64	138	142	174	189	214	222	155	155	132	132
S13_P10a_11_2	P10a	312	321	128	131	121	129	183	183	223	223	166	170	129	129	87	87	214	214	69	69	145	145	236	236	139	142	129	129	290	302	160	163	162	171	255	255	61	61	137	137	170	198	214	222	145	155	122	132
S13_M8a_13_2	M8a	315	315	128	128	121	125	180	180	197	197	NA	NA	137	137	87	95	NA	NA	69	69	145	156	238	238	NA	NA	129	129	302	302	160	171	165	168	249	251	NA	NA	140	140	185	185	214	214	155	155	132	138
S13_M8a_21_2	M8a	315	315	NA	NA	125	125	186	186	217	220	146	167	134	134	87	93	195	213	69	69	145	150	237	242	NA	NA	129	129	302	302	160	171	165	165	249	251	64	64	140	142	194	194	214	214	NA	NA	NA	NA
S13_M8a_38A_2	M8a	308	315	NA	NA	125	125	180	183	197	217	146	159	134	144	80	95	211	213	69	69	NA	NA	238	238	139	139	129	129	290	290	160	160	165	165	243	249	61	64	NA	NA	170	185	214	219	150	155	132	138
S13_P2b_31_4	P2b	315	315	NA	NA	125	125	183	186	188	217	155	166	136	140	87	93	214	219	69	69	150	156	238	238	NA	NA	129	129	302	302	157	169	165	171	237	237	61	61	NA	NA	173	189	214	234	155	155	132	132
S13_P2b_33_3	P2b	321	321	NA	NA	125	129	183	183	188	188	159	159	132	134	97	97	156	214	73	73	NA	NA	236	238	139	139	129	129	290	302	163	171	165	165	246	255	61	61	138	138	171	189	214	214	NA	NA	NA	NA
S13_P2b_34_2	P2b	312	321	119	131	125	129	183	183	220	220	159	168	129	129	101	101	214	214	69	69	147	147	237	240	139	139	129	129	302	302	163	163	165	165	255	255	64	64	144	144	167	171	214	214	NA	NA	NA	NA
S13_P2b_8_2	P2b	312	321	128	131	129	129	183	183	188	217	NA	NA	132	138	101	101	214	223	NA	NA	145	147	238	238	NA	NA	129	129	290	302	163	171	165	165	255	255	61	61	140	144	189	192	214	214	145	157	NA	NA
S13_P5b_13_4	P5b	321	321	116	131	121	125	171	171	223	223	NA	NA	133	146	97	97	213	217	73	73	147	160	238	238	NA	NA	129	136	290	302	154	157	159	159	246	255	61	64	136	138	167	171	214	214	NA	NA	128	132
S13_P5b_23_2	P5b	308	308	NA	NA	121	129	183	186	188	220	NA	NA	NA	NA	83	97	170	220	69	69	154	166	238	240	NA	NA	129	129	290	290	174	174	NA	NA	243	249	61	61	NA	NA	167	167	214	214	145	155	NA	NA
S13_P5b_23_3	P5b	308	315	NA	NA	121	121	NA	NA	188	223	NA	NA	137	145	97	97	219	219	NA	NA	NA	NA	238	238	NA	NA	136	136	302	302	160	163	165	165	249	249	61	61	138	138	167	170	214	219	NA	NA	132	135
S13_P6b_19_3	P6b	324	324	116	128	125	129	183	183	189	217	146	159	140	140	72	97	199	220	69	69	150	160	NA	NA	136	142	129	150	290	302	NA	NA	165	165	243	255	61	61	140	140	189	192	208	208	NA	NA	132	135
S13_P6b_3_4	P6b	321	321	NA	NA	121	121	174	183	220	220	159	159	141	141	83	97	215	215	69	69	NA	NA	239	239	142	142	136	139	290	302	160	160	165	174	249	249	61	61	NA	NA	167	167	214	219	NA	NA	132	135
S13_P6b_7_4	P6b	321	321	NA	NA	121	121	183	183	220	220	NA	NA	129	129	87	87	214	214	69	78	NA	NA	240	240	136	139	129	129	302	302	157	163	159	174	255	255	61	61	137	137	189	189	219	219	156	156	128	135
S13_P3b_28_4	P3b	315	324	116	131	121	125	183	183	217	217	159	159	140	140	91	97	156	214	69	69	147	147	238	238	139	142	129	129	302	302	157	157	171	171	249	249	64	64	142	142	173	173	234	234	150	155	NA	NA
C13_P9b_12_2	P9b	315	315	128	128	122	122	183	186	217	220	155	155	134	141	82	82	NA	NA	69	69	147	152	238	238	NA	NA	NA	NA	290	290	157	157	159	165	240	243	61	61	NA	NA	210	212	214	219	150	155	132	132
C13_P9b_12_3	P9b	308	315	128	131	122	122	186	186	220	220	155	159	134	134	82	82	196	214	69	69	147	152	NA	NA	139	146	129	129	290	290	157	163	165	165	249	251	NA	NA	NA	NA	192	212	214	214	150	155	132	135
C13_P9b_18_1	P9b	315	315	NA	NA	121	121	186	186	217	220	155	170	141	141	97	101	173	196	69	69	NA	NA	236	236	142	142	129	150	290	290	157	163	165	174	243	243	61	64	137	137	171	173	219	231	155	158	132	132
C13_P9b_19_2	P9b	321	321	116	131	120	124	183	186	217	220	159	164	NA	NA	78	78	214	214	69	69	159	166	238	238	121	121	129	129	302	302	157	157	165	174	NA	NA	61	61	NA	NA	167	210	NA	NA	NA	NA	132	132
C13_P9b_24_2	P9b	315	315	131	131	122	122	186	186	NA	NA	159	159	NA	NA	97	101	134	134	69	69	NA	NA	238	238	139	142	129	150	302	302	157	163	165	174	249	255	64	64	NA	NA	192	210	NA	NA	155	155	132	132
C13_P9b_24_4	P9b	315	321	NA	NA	127	131	180	183	217	220	159	167	134	134	NA	NA	134	134	69	69	152	152	NA	NA	139	142	129	129	302	302	157	163	162	174	NA	NA	NA	NA	NA	NA	189	192	219	222	155	164	135	142
C13_P9b_28_2	P9b	308	318	128	131	120	124	183	186	217	220	159	170	NA	NA	78	97	134	134	69	78	NA	NA	236	236	142	142	129	129	290	302	157	163	162	165	246	251	61	61	NA	NA	192	212	219	231	155	155	132	132
C13_M7b_1_1	M7b	315	315	NA	NA	121	121	174	174	217	217	146	151	NA	NA	86	97	195	195	69	69	152	152	238	238	139	139	129	129	302	302	151	160	165	171	243	246	61	61	138	142	185	189	214	217	145	155	122	135
C13_M7b_1_2	M7b	315	315	128	128	121	121	174	174	217	217	146	146	136	136	86	97	196	196	69	69	152	152	238	238	138	138	129	129	302	302	151	160	168	171	243	246	61	61	137	142	189	189	219	219	145	155	122	135
C13_M7b_12_2	M7b	315	321	128	128	121	121	183	186	217	217	146	167	NA	NA	86	86	NA	NA	69	69	152	152	238	238	142	142	129	129	302	302	163	171	165	168	234	243	61	64	138	142	192	192	214	214	155	158	135	138
C13_M7b_22_2	M7b	315	315	NA	NA	120	120	171	171	217	217	146	151	136	140	NA	NA	196	196	69	69	180	182	238	238	136	139	129	139	302	302	160	166	NA	NA	243	249	64	64	NA	NA	192	192	214	219	155	155	135	135
C13_M7b_7_1	M7b	321	321	NA	NA	124	124	186	186	NA	NA	NA	NA	NA	NA	86	86	213	219	69	69	NA	NA	232	238	NA	NA	129	129	302	302	166	171	171	171	243	251	61	61	NA	NA	185	185	217	217	155	155	132	132
C13_M7b_8_4	M7b	315	321	125	131	125	125	183	183	217	217	146	151	131	131	NA	NA	NA	NA	69	69	152	152	238	238	NA	NA	129	129	290	302	163	163	165	165	243	243	61	73	NA	NA	185	185	214	217	155	158	132	135
C13_P1a_13_2	P1a	321	321	128	128	121	121	183	183	220	220	155	155	129	129	87	87	NA	NA	69	78	152	152	240	240	139	149	129	129	302	302	163	163	NA	NA	255	255	61	61	NA	NA	189	189	219	219	156	156	122	128
C13_P1a_16_1	P1a	321	321	128	131	131	131	183	183	220	220	155	159	129	129	87	87	150	214	NA	NA	152	152	240	240	136	136	129	129	302	302	157	163	174	174	255	255	61	61	NA	NA	189	189	214	228	157	157	NA	NA
C13_P1a_16_3	P1a	312	321	128	128	122	131	183	186	220	220	155	159	NA	NA	87	87	150	214	69	73	152	152	240	240	NA	NA	129	129	302	302	163	163	174	174	252	255	61	80	NA	NA	189	189	219	228	157	157	135	142
C13_P1a_18_1	P1a	308	321	128	131	122	131	183	183	220	220	159	159	129	129	87	87	214	217	69	73	152	152	240	240	NA	NA	129	129	302	302	163	163	159	174	255	255	61	64	NA	NA	189	189	219	219	NA	NA	128	135
C13_P1a_25_1	P1a	321	321	128	128	121	121	183	183	220	220	155	159	129	129	87	87	214	217	73	79	152	152	237	237	NA	NA	129	150	290	302	157	163	165	165	NA	NA	61	61	137	137	171	189	219	219	157	158	142	148
C13_P1a_25_2	P1a	321	321	128	131	129	129	183	183	220	220	159	159	129	129	87	87	214	214	52	52	152	152	240	240	136	136	150	150	302	302	163	163	NA	NA	255	255	61	64	NA	NA	189	189	219	219	NA	NA	NA	NA
C13_P1a_27_1	P1a	312	321	128	131	122	131	183	183	220	220	159	159	129	154	87	87	214	214	69	73	152	152	240	240	136	136	129	129	290	302	157	163	159	174	255	255	NA	NA	NA	NA	189	189	219	219	156	156	122	142
C13_P1a_27_2	P1a	308	321	128	131	122	122	183	186	220	220	155	159	154	154	87	87	214	214	NA	NA	NA	NA	240	240	136	139	129	150	302	302	157	163	159	159	255	255	61	61	NA	NA	167	189	219	219	156	158	128	135
C13_P1a_4A_4	P1a	312	321	128	131	122	122	183	186	220	220	155	159	154	154	87	87	214	214	69	78	152	152	240	240	139	142	129	129	302	302	163	163	174	174	NA	NA	61	64	NA	NA	189	189	219	219	156	156	122	128
C13_P1a_5_2	P1a	321	321	131	131	121	121	183	186	NA	NA	NA	NA	129	141	87	87	214	214	NA	NA	152	152	240	240	136	136	129	129	302	302	157	157	174	177	255	255	61	61	NA	NA	189	189	219	219	NA	NA	122	122
C13_P9a_10_4	P9a	308	315	NA	NA	121	121	183	186	NA	NA	146	163	140	146	83	87	215	218	69	69	NA	NA	238	238	139	142	129	129	302	302	157	163	159	171	NA	NA	64	64	137	140	189	189	208	222	145	158	122	122
C13_P9a_11_2	P9a	321	321	128	128	129	129	180	186	NA	NA	163	163	136	136	87	93	209	218	73	73	150	159	234	234	139	142	129	129	290	302	157	163	165	165	249	249	61	64	NA	NA	NA	NA	214	222	155	155	122	128
C13_P9a_30_1	P9a	318	321	128	131	121	129	183	183	197	220	NA	NA	NA	NA	87	97	215	218	73	78	NA	NA	NA	NA	NA	NA	129	129	302	302	148	163	165	171	240	252	69	69	137	140	167	167	222	222	158	158	NA	NA
C13_P9a_4_1	P9a	321	321	128	128	120	128	180	183	217	217	146	155	129	145	87	87	153	153	73	73	150	150	236	236	139	142	129	129	290	290	163	163	165	171	240	249	61	64	NA	NA	171	192	214	214	155	155	135	135
C13_P9a_4_2	P9a	315	321	128	131	129	129	180	180	217	217	146	155	140	145	83	87	153	162	69	69	150	150	234	234	121	139	129	129	290	302	157	163	159	165	NA	NA	61	61	140	140	171	171	214	214	158	158	122	122
C13_P9a_42_1	P9a	308	321	131	131	121	121	186	186	197	217	155	167	129	129	83	97	NA	NA	52	69	150	150	236	238	121	139	129	129	302	302	157	157	159	165	249	249	64	64	NA	NA	189	189	214	222	145	158	NA	NA
C13_P9a_5_1	P9a	318	331	NA	NA	121	129	183	183	220	220	146	155	NA	NA	83	87	159	215	NA	NA	150	159	236	236	136	139	129	129	302	302	157	163	159	159	249	249	61	64	137	137	188	192	214	222	145	158	NA	NA
C13_P9a_5_2	P9a	318	318	NA	NA	122	122	183	186	220	220	146	163	NA	NA	83	83	215	215	69	69	147	152	236	236	136	142	129	129	302	302	157	163	NA	NA	249	249	61	61	NA	NA	188	188	214	214	155	158	135	135
C13_P9a_9_4	P9a	321	321	116	128	129	129	177	180	NA	NA	155	159	140	140	87	87	162	209	69	73	NA	NA	236	236	121	121	129	129	290	302	163	163	159	165	249	261	61	64	140	140	167	192	214	231	155	158	122	122
C13_M6a_12_1	M6a	315	321	111	122	120	124	171	183	220	220	NA	NA	134	137	87	93	195	195	69	69	150	156	232	242	139	142	129	139	302	302	163	163	159	168	245	265	NA	NA	NA	NA	194	194	217	226	155	157	132	132
C13_M6a_14_4	M6a	308	321	111	128	121	121	183	186	197	220	146	146	137	137	93	95	196	196	69	69	NA	NA	NA	NA	NA	NA	139	139	302	302	163	163	NA	NA	243	249	NA	NA	138	139	167	194	217	219	NA	NA	132	135
C13_M6a_2_1	M6a	321	321	128	131	125	125	177	183	220	220	146	167	NA	NA	87	87	NA	NA	52	52	150	156	235	238	NA	NA	129	150	290	302	163	163	165	168	NA	NA	61	64	139	139	189	192	219	219	NA	NA	132	135
C13_M6a_2_2	M6a	321	321	131	131	125	125	177	177	NA	NA	146	146	129	129	87	87	NA	NA	69	69	150	150	238	242	138	142	129	129	290	290	163	163	NA	NA	245	249	NA	NA	NA	NA	189	189	214	219	157	157	132	132
C13_M6a_5_2	M6a	321	321	111	111	121	125	183	183	220	220	NA	NA	136	136	87	87	NA	NA	69	73	150	152	235	242	142	142	129	139	290	302	160	163	168	168	249	265	61	64	140	140	189	194	214	217	155	158	132	132
C13_M6a_5_4	M6a	315	321	NA	NA	121	125	171	177	209	217	NA	NA	134	134	87	93	NA	NA	69	69	145	156	237	242	142	146	139	139	290	302	163	163	159	168	NA	NA	61	64	138	140	189	189	214	217	155	157	132	132
C13_M6a_6_2	M6a	321	321	NA	NA	125	125	183	183	197	197	155	159	NA	NA	87	95	NA	NA	69	69	147	152	237	237	142	142	129	139	302	302	163	163	NA	NA	255	255	NA	NA	NA	NA	174	189	219	219	155	155	132	132
C13_M6a_6_3	M6a	321	321	111	111	125	125	183	183	NA	NA	159	159	NA	NA	95	95	NA	NA	69	69	NA	NA	NA	NA	NA	NA	129	129	302	302	163	163	165	168	255	255	69	69	NA	NA	174	174	219	219	155	155	132	132
C13_P10a_10_4	P10a	315	315	128	131	121	121	177	177	NA	NA	146	159	140	144	87	97	NA	NA	69	69	NA	NA	236	236	136	142	129	129	302	302	160	163	NA	NA	249	255	61	64	137	140	198	210	208	219	NA	NA	125	142
C13_P10a_11_1	P10a	315	315	128	128	122	122	180	183	223	223	146	170	129	144	87	95	NA	NA	69	73	NA	NA	236	236	136	142	129	129	302	302	160	163	165	165	255	255	61	61	NA	NA	171	189	208	222	145	158	132	135
C13_P10a_12_1	P10a	315	315	NA	NA	122	122	180	183	223	223	NA	NA	NA	NA	87	97	214	214	73	73	147	152	236	236	NA	NA	129	129	302	302	160	163	162	162	243	255	61	64	NA	NA	171	198	214	222	145	158	132	135
C13_P10a_12_4	P10a	321	321	NA	NA	122	122	177	183	223	223	NA	NA	129	144	87	87	NA	NA	69	73	147	147	236	236	139	142	129	129	302	302	157	160	162	168	NA	NA	61	64	NA	NA	171	198	219	222	145	158	132	135
C13_P10a_22_1	P10a	315	315	128	128	122	122	177	180	220	223	159	170	129	134	87	87	214	214	69	73	147	147	236	236	139	139	129	129	302	302	163	163	171	174	243	255	61	61	NA	NA	171	189	219	219	145	156	135	142
C13_P10a_39_1	P10a	315	315	114	128	122	122	177	180	223	223	155	166	137	137	87	97	NA	NA	69	73	NA	NA	236	238	NA	NA	129	129	302	302	160	163	171	171	240	249	61	61	NA	NA	171	198	208	219	145	145	122	132
C13_P10a_39_2	P10a	315	315	128	131	122	122	177	180	NA	NA	155	155	137	144	87	87	NA	NA	69	73	147	152	236	236	121	139	129	129	302	302	160	163	NA	NA	249	255	61	61	NA	NA	171	198	208	222	145	145	135	135
C13_P10a_43_2	P10a	308	312	128	128	121	121	180	183	NA	NA	159	166	NA	NA	87	97	NA	NA	73	73	NA	NA	238	238	121	121	129	129	302	302	160	160	162	171	249	255	61	64	137	139	170	198	214	231	145	156	NA	NA
C13_P10a_6_1	P10a	315	315	128	128	121	121	177	183	223	223	146	146	134	134	87	87	214	214	69	73	147	152	236	236	121	139	129	129	302	302	163	163	162	171	NA	NA	61	61	NA	NA	171	189	219	219	145	156	135	135
C13_P10a_9_1	P10a	315	321	128	131	121	121	177	180	223	223	NA	NA	129	129	97	97	214	214	73	73	NA	NA	236	236	136	142	129	129	302	302	160	160	162	162	240	255	61	64	NA	NA	171	210	214	219	145	145	NA	NA
C13_P10a_9_2	P10a	315	321	131	131	121	121	180	183	223	223	146	159	NA	NA	87	87	NA	NA	69	73	145	147	236	236	NA	NA	129	129	302	302	157	163	162	177	249	255	NA	NA	NA	NA	171	198	208	214	145	158	125	142
C13_P10a_9_3	P10a	321	321	131	131	121	121	177	183	223	223	NA	NA	129	140	87	87	NA	NA	69	73	147	152	236	236	121	121	129	129	302	302	160	163	162	174	240	249	NA	NA	140	142	171	210	214	219	145	145	132	135
C13_M8a_13_1	M8a	315	315	128	128	121	121	180	180	197	197	146	146	137	137	87	95	NA	NA	69	69	145	156	238	238	155	155	129	129	302	302	160	171	165	168	249	249	61	64	NA	NA	167	189	214	214	150	155	132	138
C13_M8a_16_1	M8a	315	315	111	128	125	125	183	186	197	220	146	167	137	141	87	93	213	213	69	69	150	168	233	237	NA	NA	129	139	290	302	160	163	168	171	249	249	61	61	140	142	192	194	241	241	150	157	138	138
C13_M8a_16_2	M8a	315	315	128	128	125	125	183	186	197	217	NA	NA	140	140	87	95	NA	NA	69	69	152	168	233	237	NA	NA	129	129	302	302	163	166	158	165	243	249	61	64	140	144	192	192	214	241	157	157	132	138
C13_M8a_18_1	M8a	315	315	116	128	125	125	174	183	217	220	NA	NA	NA	NA	87	95	213	213	NA	NA	152	154	238	238	138	142	129	139	302	302	160	163	168	168	249	251	61	64	137	140	167	189	214	214	155	155	132	138
C13_M8a_29_4	M8a	315	324	111	111	125	125	177	177	NA	NA	146	146	137	137	87	87	NA	NA	52	73	147	152	232	232	NA	NA	129	129	290	302	163	171	165	165	249	249	61	64	NA	NA	189	189	214	214	150	150	132	132
C13_M8a_31_2	M8a	315	315	NA	NA	121	125	183	186	197	217	NA	NA	134	146	87	87	NA	NA	69	69	145	147	234	238	139	142	129	129	302	302	160	171	165	168	249	249	61	61	NA	NA	194	194	219	219	150	155	NA	NA
C13_M8a_35_2	M8a	315	315	128	128	125	125	180	183	197	220	146	146	NA	NA	NA	NA	213	223	69	69	147	168	238	238	133	155	129	129	290	302	160	160	165	174	243	249	61	64	NA	NA	194	194	214	219	150	150	132	138
C13_P2b_21_2	P2b	321	321	131	131	121	125	183	183	NA	NA	NA	NA	132	132	97	101	209	209	73	73	145	147	238	238	NA	NA	129	129	290	290	171	171	NA	NA	243	246	64	64	NA	NA	171	171	214	219	155	155	135	135
C13_P2b_25_2	P2b	321	321	NA	NA	125	129	183	183	NA	NA	159	159	126	132	97	97	212	214	NA	NA	NA	NA	236	238	138	138	129	150	302	302	163	163	159	165	249	255	61	64	136	140	171	192	214	214	145	157	132	132
C13_P2b_28_1	P2b	321	321	114	128	129	129	183	183	209	220	159	159	132	132	97	97	211	223	69	69	145	145	240	240	139	142	129	129	290	302	160	171	165	165	246	255	61	64	136	136	167	171	226	226	145	145	132	132
C13_P2b_33_2	P2b	315	321	114	119	130	130	183	183	188	217	NA	NA	132	132	97	97	156	211	69	69	145	164	236	238	138	138	129	129	302	302	NA	NA	165	165	240	246	61	64	NA	NA	189	189	214	226	145	155	135	135
C13_P2b_6_2	P2b	321	321	114	119	125	129	183	183	209	220	159	159	126	132	97	97	218	223	69	69	NA	NA	236	236	NA	NA	129	150	302	302	160	163	NA	NA	255	255	61	64	NA	NA	167	167	214	226	145	155	132	132
C13_P2b_8_4	P2b	312	315	NA	NA	121	129	183	183	188	209	NA	NA	132	141	97	97	NA	NA	69	69	164	164	236	236	139	142	129	150	302	302	163	163	165	165	NA	NA	61	64	NA	NA	167	171	214	226	155	157	NA	NA
C13_P5b_19_2	P5b	318	318	122	122	125	125	186	186	217	223	NA	NA	129	137	97	97	223	223	69	78	152	152	236	236	NA	NA	129	136	290	302	157	160	162	164	243	246	NA	NA	137	141	167	167	208	208	150	150	132	142
C13_P5b_26_2	P5b	315	321	NA	NA	121	130	183	183	220	223	146	146	NA	NA	83	87	NA	NA	69	73	NA	NA	232	232	NA	NA	129	136	302	302	154	160	NA	NA	255	255	NA	NA	NA	NA	167	167	214	219	158	158	122	132
C13_P5b_26_4	P5b	305	321	111	131	125	130	183	183	220	220	NA	NA	NA	NA	87	97	NA	NA	73	73	152	170	236	236	139	146	139	145	290	302	160	163	159	165	240	243	61	64	NA	NA	167	210	214	217	155	158	132	135
C13_P5b_32_3	P5b	308	321	131	131	121	125	183	183	189	220	NA	NA	140	140	83	87	165	165	NA	NA	147	152	236	236	127	139	129	139	290	302	157	157	165	168	246	249	61	64	NA	NA	171	171	214	226	145	150	142	142
C13_P5b_8_1	P5b	305	315	NA	NA	125	125	183	186	217	220	146	163	132	145	87	101	170	221	NA	NA	150	156	236	238	139	142	129	145	290	290	163	174	165	165	240	249	64	64	136	138	167	167	226	231	155	158	122	135
C13_P6b_1_1	P6b	315	315	128	128	120	120	174	180	220	220	151	155	NA	NA	87	103	NA	NA	69	69	145	171	235	235	139	142	129	139	290	302	169	174	168	168	249	249	61	61	NA	NA	185	185	NA	NA	155	155	135	135
C13_P6b_13_2	P6b	318	321	122	128	121	125	183	183	189	220	155	159	140	140	83	97	215	220	69	78	166	166	NA	NA	139	142	136	139	302	302	148	160	165	171	240	243	61	61	NA	NA	167	167	214	219	145	155	135	142
C13_P6b_14_2	P6b	321	321	114	131	117	121	183	183	188	217	155	155	140	140	83	97	214	215	69	69	150	156	237	239	127	139	129	129	290	302	160	163	165	168	243	249	61	61	138	140	167	181	214	219	145	145	132	132
C13_P6b_19_4	P6b	321	324	119	128	129	129	183	183	189	189	159	159	141	146	72	97	218	220	69	69	145	160	236	238	133	146	129	129	290	290	163	174	165	165	240	243	61	64	137	140	189	192	214	214	155	155	132	132
C13_P6b_21_4	P6b	305	321	125	128	121	121	183	183	212	223	NA	NA	NA	NA	83	101	214	214	NA	NA	NA	NA	239	239	139	142	129	136	290	302	163	163	165	168	NA	NA	61	69	NA	NA	181	181	211	219	150	155	132	132
C13_P6b_3_1	P6b	321	324	NA	NA	119	122	183	186	188	220	NA	NA	137	137	87	101	214	214	69	69	147	147	239	239	142	142	139	150	290	302	160	163	165	168	249	251	61	61	NA	NA	NA	NA	214	219	145	155	NA	NA
C13_P3b_17_2	P3b	308	321	NA	NA	121	129	186	186	217	220	159	167	NA	NA	93	93	214	214	69	78	NA	NA	236	239	NA	NA	129	134	302	302	157	163	171	180	240	249	61	61	NA	NA	167	173	214	234	145	155	132	135
C13_P3b_25_2	P3b	315	321	NA	NA	127	131	183	183	188	188	155	159	136	136	87	95	NA	NA	69	69	152	156	239	239	NA	NA	129	129	302	302	157	157	165	165	NA	NA	61	64	NA	NA	NA	NA	214	234	155	155	132	132
C13_P3b_26_1	P3b	312	315	NA	NA	127	127	183	186	217	220	NA	NA	NA	NA	93	95	214	214	69	69	147	152	239	239	NA	NA	134	134	302	302	157	157	165	171	245	249	61	64	NA	NA	167	167	219	219	150	155	135	138
C13_P3b_28_1	P3b	315	324	128	128	121	129	183	183	NA	NA	NA	NA	140	146	91	97	156	214	69	73	NA	NA	240	240	139	142	129	129	290	302	157	163	171	171	249	249	61	64	NA	NA	173	173	234	234	155	155	132	132
C13_P3b_28_2	P3b	315	315	116	131	122	122	NA	NA	217	217	159	159	146	146	91	97	NA	NA	69	69	147	147	238	240	139	142	129	129	302	302	157	157	NA	NA	240	249	61	64	NA	NA	173	173	234	234	150	155	132	135
C13_P3b_31_1	P3b	315	315	NA	NA	125	129	183	186	188	217	NA	NA	136	136	87	93	214	219	69	69	152	152	239	239	NA	NA	129	129	302	302	169	169	165	165	240	249	61	61	NA	NA	167	192	NA	NA	155	155	132	132
C13_P3b_31_2	P3b	315	321	116	128	121	125	183	183	217	217	151	159	140	144	87	97	214	214	NA	NA	NA	NA	236	236	142	142	129	134	302	302	157	157	171	180	249	249	61	64	137	142	167	167	214	231	145	155	132	135
C13_P9b_1_3	P9b	308	321	131	131	121	121	183	183	NA	NA	159	159	146	146	78	78	170	214	69	69	159	172	236	238	121	142	129	129	302	302	157	157	165	168	245	255	61	61	138	138	167	189	214	219	150	150	NA	NA
C13_P9b_11_3	P9b	305	308	NA	NA	125	125	183	183	NA	NA	NA	NA	143	143	82	82	214	214	69	73	150	150	238	238	NA	NA	136	136	302	302	157	157	165	165	252	252	NA	NA	NA	NA	171	189	219	219	150	155	132	135
C13_P9b_12_1	P9b	308	315	128	131	125	130	186	186	NA	NA	159	159	140	140	78	97	NA	NA	NA	NA	147	152	238	238	142	142	129	129	290	302	157	163	159	165	243	249	61	61	NA	NA	192	210	214	219	150	155	132	132
C13_P9b_18_3	P9b	315	315	128	131	121	121	186	186	NA	NA	155	159	134	141	82	82	170	173	69	69	152	159	236	236	NA	NA	129	129	290	290	157	157	162	165	243	249	61	61	NA	NA	171	173	231	231	145	155	132	135
C13_P9b_25_1	P9b	308	315	128	131	122	122	183	183	220	223	159	167	143	146	82	87	134	134	69	69	147	152	237	237	103	142	129	150	290	302	157	163	165	165	243	251	61	61	NA	NA	171	192	214	219	150	155	132	135
C13_P9b_28_1	P9b	308	315	128	131	121	121	183	183	217	220	155	159	NA	NA	78	78	134	134	52	69	152	166	236	236	NA	NA	129	139	302	302	163	163	159	165	249	255	61	61	138	138	192	192	NA	NA	150	155	132	135
C13_P9b_28_4	P9b	308	315	NA	NA	121	121	NA	NA	NA	NA	NA	NA	146	146	78	80	134	134	69	69	152	152	236	236	142	142	129	129	290	302	163	163	159	159	249	251	61	64	NA	NA	192	192	NA	NA	155	155	132	135
C13_P9b_29_3	P9b	308	308	128	131	121	125	186	186	220	220	NA	NA	140	146	82	87	NA	NA	69	78	172	172	237	237	NA	NA	129	129	290	290	157	160	165	174	243	251	61	61	138	138	171	171	214	222	150	155	132	132
C13_M7b_1_3	M7b	308	321	128	128	121	121	174	174	217	217	146	167	136	146	NA	NA	213	213	69	73	NA	NA	238	238	NA	NA	129	129	302	302	160	171	165	168	237	246	61	61	137	140	185	189	214	219	155	157	122	135
C13_M7b_1_4	M7b	321	324	NA	NA	121	125	174	183	NA	NA	146	159	136	140	86	97	NA	NA	69	69	147	152	238	238	NA	NA	129	129	302	302	160	163	165	171	NA	NA	61	61	137	140	189	189	214	214	155	158	135	135
C13_M7b_11_3	M7b	321	324	NA	NA	121	125	171	186	217	217	NA	NA	134	134	93	95	196	196	52	69	147	156	238	238	121	138	129	129	302	302	166	166	168	168	234	243	61	61	140	142	189	189	214	219	145	155	135	135
C13_M7b_12_3	M7b	315	324	NA	NA	121	125	171	183	NA	NA	NA	NA	136	146	86	95	212	212	69	69	152	154	236	238	136	142	129	129	290	302	166	171	165	171	234	243	61	61	NA	NA	167	185	214	214	155	155	135	135
C13_M7b_12_4	M7b	315	324	NA	NA	121	125	177	183	217	223	NA	NA	134	136	NA	NA	219	219	69	69	147	152	236	238	138	142	129	129	302	302	NA	NA	165	171	234	243	61	61	137	140	185	189	214	219	155	155	135	135
C13_M7b_19B_3	M7b	315	315	125	128	125	125	183	183	217	217	146	167	131	131	86	86	NA	NA	69	69	NA	NA	238	238	139	142	129	129	302	302	166	171	165	165	249	255	61	73	138	142	185	192	214	217	155	155	NA	NA
C13_M7b_22_3	M7b	315	315	128	131	121	121	171	186	217	217	NA	NA	136	136	87	95	NA	NA	69	69	147	147	238	238	136	142	129	139	302	302	163	166	165	165	243	243	64	64	138	142	185	185	217	219	155	158	132	135
C13_M7b_26_3	M7b	315	324	NA	NA	125	125	171	171	NA	NA	146	146	131	134	86	97	217	217	69	73	147	152	238	238	139	142	129	129	302	302	160	171	NA	NA	243	246	61	61	139	142	167	185	NA	NA	155	155	135	135
C13_M7b_6A_3	M7b	324	324	116	131	125	125	183	186	NA	NA	155	167	136	136	87	87	211	211	69	69	182	182	238	238	136	142	129	129	302	302	160	171	168	171	243	243	61	61	137	142	185	185	214	214	157	157	132	135
C13_M7b_8_1	M7b	321	321	NA	NA	125	125	183	186	NA	NA	NA	NA	131	137	NA	NA	NA	NA	69	69	170	182	NA	NA	NA	NA	129	129	302	302	166	171	165	171	243	255	61	61	142	142	185	185	214	217	145	158	125	132
C13_P1a_13_1	P1a	321	321	NA	NA	122	122	183	183	220	220	NA	NA	129	129	87	87	214	214	69	69	152	152	240	240	NA	NA	129	129	302	302	163	163	174	174	255	255	61	61	NA	NA	189	189	219	219	156	156	122	128
C13_P1a_35_1	P1a	312	321	128	131	121	121	183	183	220	220	159	159	143	143	87	87	214	214	69	73	152	152	240	240	NA	NA	129	129	302	302	157	163	165	174	255	255	61	61	137	137	189	189	219	219	156	158	122	122
C13_P1a_4_1	P1a	321	321	128	131	121	129	183	183	220	220	159	159	141	154	87	87	214	214	73	73	152	152	240	240	136	139	129	129	302	302	157	163	174	174	255	255	61	64	137	137	189	189	219	219	156	157	122	128
C13_P1a_4_3	P1a	321	321	131	131	121	121	183	183	NA	NA	155	159	154	154	87	87	214	217	NA	NA	152	152	240	240	NA	NA	129	150	302	302	157	163	174	174	255	255	61	64	NA	NA	189	189	219	219	156	156	122	142
C13_P1a_5_1	P1a	321	321	NA	NA	121	121	NA	NA	220	220	159	159	129	141	87	87	NA	NA	NA	NA	152	152	240	240	NA	NA	129	129	302	302	NA	NA	165	174	255	255	61	61	137	137	189	189	219	219	NA	NA	122	122
C13_P1a_5_3	P1a	312	321	131	131	121	121	183	183	220	220	155	159	129	141	87	87	214	214	69	79	152	152	240	240	136	136	129	129	302	302	157	157	174	174	252	255	61	61	137	137	189	189	219	219	156	156	122	142
C13_P9a_30_3	P9a	321	321	128	128	129	129	183	183	NA	NA	163	163	154	154	87	87	218	218	69	73	150	150	236	236	139	139	129	129	302	302	163	163	165	165	240	240	64	69	140	140	189	189	222	222	158	158	122	122
C13_P9a_38_3	P9a	308	315	128	128	121	129	180	183	217	220	NA	NA	136	141	83	83	159	220	69	73	137	150	234	234	121	121	129	129	290	302	148	163	159	165	240	240	64	64	137	140	NA	NA	NA	NA	158	158	132	142
C13_P9a_6_3	P9a	315	318	NA	NA	121	129	183	183	217	226	155	159	141	149	83	87	215	217	69	69	150	150	237	237	121	142	129	129	302	302	157	163	165	174	249	249	64	64	138	140	192	192	214	214	145	158	122	132
C13_P9a_6_4	P9a	315	321	128	131	122	131	183	183	NA	NA	NA	NA	136	154	83	87	153	218	73	73	150	150	236	236	121	139	129	129	290	302	NA	NA	159	174	240	249	64	64	139	141	192	192	214	222	145	158	135	142
C13_P9a_9_1	P9a	308	321	NA	NA	121	129	180	186	217	220	NA	NA	141	141	87	87	215	215	69	73	150	150	NA	NA	139	142	129	129	290	302	NA	NA	159	165	240	249	61	64	140	140	167	189	214	222	145	155	122	122
C13_P9a_9_3	P9a	308	321	128	131	129	129	177	186	197	217	146	159	141	145	87	87	153	162	52	73	150	160	NA	NA	139	142	129	129	290	302	148	163	159	159	249	261	NA	NA	NA	NA	192	192	NA	NA	155	158	132	135
C13_M6a_11_3	M6a	321	321	119	128	125	125	171	183	197	220	NA	NA	129	129	87	97	196	196	69	69	145	152	235	238	NA	NA	129	139	302	302	163	163	165	165	249	265	61	61	140	142	189	194	214	217	NA	NA	132	132
C13_M6a_3_3	M6a	321	321	NA	NA	125	129	NA	NA	220	220	146	159	129	134	80	97	196	196	69	69	150	152	235	238	138	142	129	139	302	302	163	163	159	165	243	251	NA	NA	138	140	189	194	217	226	155	155	132	132
C13_M6a_5_3	M6a	321	321	111	131	121	125	177	183	220	220	146	146	136	136	87	87	NA	NA	69	69	147	150	235	235	NA	NA	129	129	290	290	163	163	159	168	249	265	64	69	137	140	189	194	214	219	157	157	132	132
C13_M6a_6_1	M6a	321	321	111	128	121	125	NA	NA	220	220	155	155	129	134	87	95	NA	NA	69	69	145	150	235	238	142	142	139	139	290	302	163	163	159	165	249	255	64	64	137	139	NA	NA	219	219	155	155	132	132
C13_M6a_6_4	M6a	315	321	NA	NA	125	125	171	183	220	220	146	159	137	137	87	97	196	214	69	69	150	152	238	238	121	142	129	139	302	302	163	163	165	165	251	255	64	64	140	140	167	167	219	226	155	155	132	132
C13_M6a_9_1	M6a	315	321	111	128	121	125	NA	NA	217	220	167	166	129	129	87	93	196	217	69	69	147	147	235	237	139	142	129	139	302	302	163	163	165	165	243	249	64	64	138	138	167	167	214	226	150	155	122	132
C13_M6a_9_4	M6a	315	315	NA	NA	121	121	NA	NA	NA	NA	167	167	129	137	87	95	156	196	69	69	145	147	235	237	NA	NA	139	150	302	302	160	163	NA	NA	249	255	61	64	138	140	192	192	214	238	150	155	132	132
C13_P10a_14_1	P10a	315	321	128	131	121	121	177	180	223	223	NA	NA	129	134	87	87	214	214	69	73	147	152	236	236	NA	NA	129	129	302	302	160	163	171	177	249	249	61	61	NA	NA	171	171	219	231	150	156	NA	NA
C13_P10a_14_3	P10a	312	315	128	131	121	121	183	183	NA	NA	NA	NA	137	140	87	97	214	214	69	69	NA	NA	236	236	121	136	129	136	290	302	160	163	177	177	249	255	61	61	137	139	171	171	219	222	145	155	132	135
C13_P10a_28_1	P10a	305	312	114	128	121	121	177	180	220	223	146	159	137	144	87	87	213	213	69	73	147	147	236	236	136	139	129	150	302	302	157	163	162	162	243	255	61	64	137	142	171	198	222	222	145	150	125	135
C13_P10a_28_3	P10a	315	321	114	131	121	121	180	183	223	223	NA	NA	137	137	87	97	NA	NA	69	73	147	147	238	238	NA	NA	129	129	302	302	157	157	162	171	243	249	61	64	137	137	171	189	214	219	145	150	125	125
C13_P10a_39_3	P10a	315	321	NA	NA	121	121	180	180	NA	NA	155	155	129	144	87	87	214	214	69	73	147	152	236	236	NA	NA	129	129	302	302	160	163	162	162	249	252	61	61	137	137	171	198	208	222	145	145	122	132
C13_M8a_13_3	M8a	315	321	NA	NA	125	125	180	186	197	197	NA	NA	137	140	87	95	213	213	69	69	145	147	238	238	NA	NA	129	129	302	302	171	171	168	174	249	249	NA	NA	138	140	185	194	214	214	150	155	135	138
C13_M8a_16_3	M8a	315	324	NA	NA	125	125	183	186	197	220	NA	NA	140	140	93	95	213	213	69	69	154	154	237	237	NA	NA	129	129	302	302	163	166	165	165	249	249	61	61	138	140	192	192	241	241	150	150	138	138
C13_M8a_18_4	M8a	321	321	NA	NA	125	125	183	183	220	220	146	163	134	134	87	87	213	213	69	69	150	168	237	237	NA	NA	129	129	302	302	160	160	165	168	243	243	NA	NA	NA	NA	167	192	214	214	155	155	138	138
C13_M8a_21_1	M8a	315	321	NA	NA	121	125	171	186	220	220	146	167	134	134	87	93	NA	NA	69	69	150	156	233	242	NA	NA	129	129	302	302	163	163	165	165	249	251	64	64	138	140	189	194	214	214	155	157	135	138
C13_M8a_31_3	M8a	308	315	NA	NA	125	125	183	183	197	197	146	159	134	144	80	87	NA	NA	69	69	152	156	238	238	NA	NA	129	129	302	302	160	160	165	174	243	249	64	64	138	140	185	194	214	222	150	157	132	132
C13_M8a_38_3	M8a	315	315	128	128	125	125	183	186	NA	NA	146	146	134	144	95	95	211	223	69	69	152	168	234	234	139	142	129	139	290	302	160	171	165	174	243	249	64	64	137	140	185	185	214	219	150	157	132	132
C13_M8a_43_1	M8a	315	321	NA	NA	125	130	171	180	220	220	NA	NA	134	140	87	87	213	213	69	69	145	168	NA	NA	NA	NA	129	129	302	302	163	171	165	168	249	249	61	61	NA	NA	189	194	214	219	157	157	142	142
C13_M8a_43_3	M8a	315	321	111	128	NA	NA	180	180	220	220	146	146	134	134	87	87	NA	NA	69	73	168	168	NA	NA	NA	NA	129	139	302	302	163	171	171	171	249	249	64	64	138	138	194	194	214	214	157	157	142	142
C13_P2b_1_1	P2b	312	312	128	131	129	129	183	183	NA	NA	159	159	129	134	97	101	NA	NA	69	73	147	164	236	236	NA	NA	129	150	290	302	151	163	165	171	240	255	NA	NA	138	144	171	171	214	214	145	157	135	135
C13_P2b_1_3	P2b	312	312	NA	NA	125	129	183	183	188	209	159	159	132	134	97	101	NA	NA	73	73	147	152	236	236	139	139	129	129	290	302	163	166	165	165	246	246	61	61	138	144	171	171	214	214	145	145	NA	NA
C13_P2b_12_1	P2b	321	321	NA	NA	125	129	183	183	209	220	156	159	129	141	101	101	156	211	69	73	147	155	236	238	136	139	150	150	302	302	NA	NA	159	165	246	246	64	64	NA	NA	167	189	214	214	155	157	135	151
C13_P2b_12_3	P2b	321	321	NA	NA	125	129	183	183	220	220	NA	NA	126	129	97	101	156	211	69	69	147	147	236	238	NA	NA	129	150	302	302	154	154	165	165	246	255	61	64	138	144	189	189	214	214	145	155	135	135
C13_P2b_28_3	P2b	321	321	119	119	129	129	183	183	NA	NA	NA	NA	132	141	97	97	NA	NA	69	69	147	164	238	238	139	139	129	129	290	302	163	171	165	165	240	243	61	64	136	136	167	189	NA	NA	145	145	135	135
C13_P2b_31_4	P2b	315	321	NA	NA	129	129	183	183	209	220	159	159	126	132	101	101	223	223	69	69	147	164	NA	NA	NA	NA	129	150	302	302	160	163	159	165	249	255	64	64	140	140	167	171	214	214	145	145	132	135
C13_P2b_33_1	P2b	321	321	NA	NA	129	129	183	183	188	209	159	159	134	141	97	97	156	211	69	69	145	164	236	236	138	139	129	129	302	302	NA	NA	165	165	240	255	64	64	136	138	189	189	214	214	155	157	135	135
C13_P2b_33_4	P2b	321	321	114	114	129	129	183	183	NA	NA	159	159	132	134	97	97	156	156	69	69	145	145	236	236	NA	NA	129	129	302	302	163	163	165	165	240	255	NA	NA	NA	NA	189	189	214	219	155	157	128	135
C13_P2b_34_1	P2b	321	321	NA	NA	129	129	183	183	NA	NA	146	159	126	126	97	97	156	156	69	73	164	164	236	236	139	139	129	150	302	302	163	171	159	165	246	246	64	64	138	144	167	167	214	238	145	145	135	135
C13_P2b_34_3	P2b	312	321	131	131	125	129	183	183	NA	NA	NA	NA	129	132	97	101	214	214	73	73	164	164	NA	NA	139	142	129	129	302	302	163	163	165	165	246	255	64	64	138	140	167	167	214	214	157	157	135	135
C13_P5b_13_1	P5b	321	321	NA	NA	121	129	171	183	223	223	146	151	133	146	97	97	199	213	69	78	150	160	238	238	139	142	129	145	290	302	160	160	165	165	246	255	61	61	136	138	167	171	208	214	145	155	128	128
C13_P5b_13_4	P5b	321	321	NA	NA	121	125	180	186	NA	NA	NA	NA	133	140	87	97	214	214	NA	NA	152	152	NA	NA	142	142	129	145	302	302	157	157	165	165	246	246	61	64	138	138	167	189	214	214	145	155	135	142
C13_P5b_19_3	P5b	318	321	NA	NA	121	125	183	186	188	217	155	155	129	134	97	97	213	223	69	73	150	164	238	238	142	146	129	150	302	302	NA	NA	NA	NA	240	243	61	64	137	137	167	171	208	219	150	150	132	132
C13_P5b_26_3	P5b	305	315	111	131	121	129	NA	NA	220	223	146	146	132	145	83	83	168	214	NA	NA	152	160	241	241	124	139	129	139	302	302	154	154	165	165	240	240	61	64	NA	NA	167	181	NA	NA	155	155	132	132
C13_P6b_13_1	P6b	312	321	NA	NA	117	125	183	183	NA	NA	NA	NA	134	140	83	88	159	215	73	78	147	150	237	240	NA	NA	129	129	290	302	148	160	165	168	240	249	61	61	136	138	167	167	NA	NA	155	155	NA	NA
C13_P6b_14_3	P6b	315	321	128	131	117	121	183	186	217	220	155	159	140	140	83	97	214	214	69	78	152	166	237	237	139	142	129	129	290	290	NA	NA	165	168	246	249	61	61	137	140	181	181	214	219	145	155	132	135
C13_P6b_3_4	P6b	305	321	128	128	121	121	183	183	189	220	155	159	134	140	101	101	NA	NA	NA	NA	147	152	232	235	142	142	136	136	290	302	160	160	165	168	249	249	61	61	140	142	167	167	214	219	155	155	132	135
C13_P6b_8_3	P6b	321	321	131	131	117	125	174	183	220	220	159	159	NA	NA	87	97	215	223	69	78	152	156	NA	NA	NA	NA	129	129	302	302	154	163	165	174	249	249	61	61	140	142	181	181	NA	NA	145	145	135	135
C13_P6b_9_1	P6b	321	321	NA	NA	125	125	180	183	220	220	NA	NA	140	140	97	97	199	215	69	69	152	152	NA	NA	NA	NA	129	136	302	302	148	163	168	171	240	249	61	61	NA	NA	167	181	214	214	145	155	132	142
C13_P6b_9_3	P6b	321	324	131	131	117	125	174	186	NA	NA	146	159	NA	NA	97	97	199	199	69	69	145	152	NA	NA	124	139	129	136	290	302	NA	NA	162	165	240	249	61	61	134	137	167	167	NA	NA	145	155	135	135
C13_P3b_15_1	P3b	321	324	NA	NA	121	121	186	186	217	217	151	155	140	144	95	97	214	219	69	69	156	160	240	240	142	142	129	129	302	302	157	157	165	171	249	249	64	64	137	144	167	172	214	234	150	155	135	135
C13_P3b_15_2	P3b	315	324	116	128	121	129	183	186	217	217	146	159	144	144	93	97	NA	NA	69	69	156	156	NA	NA	142	142	129	129	302	302	157	157	165	171	249	249	61	61	137	137	167	167	214	234	155	155	132	132
C13_P3b_16_1	P3b	315	315	128	131	125	129	183	186	188	217	NA	NA	134	146	93	93	215	222	69	69	152	152	NA	NA	NA	NA	129	129	302	302	157	163	171	171	249	249	61	64	137	142	167	173	226	234	NA	NA	132	138
C13_P3b_16_3	P3b	321	324	116	131	125	125	183	186	NA	NA	NA	NA	146	146	93	95	214	214	69	69	152	152	236	240	142	142	129	129	302	302	160	169	165	171	240	249	64	64	137	137	173	173	214	226	150	150	132	135
C13_P3b_25_1	P3b	315	315	122	128	127	127	183	183	188	220	159	163	136	136	87	87	214	222	52	69	156	156	239	239	NA	NA	129	129	302	302	157	157	165	171	245	249	NA	NA	NA	NA	NA	NA	219	234	145	155	132	132
C13_P3b_25_3	P3b	315	315	NA	NA	125	129	183	186	NA	NA	146	159	136	140	87	87	214	219	69	69	156	156	232	239	NA	NA	129	129	302	302	157	169	165	168	237	237	NA	NA	NA	NA	173	189	NA	NA	155	155	122	132
C13_P3b_28_3	P3b	315	324	NA	NA	121	125	183	183	217	217	159	159	140	140	91	91	156	156	69	69	147	156	238	238	NA	NA	NA	NA	302	302	157	157	171	171	240	240	64	64	137	142	173	173	NA	NA	150	155	132	135
C13_P3b_28_4	P3b	324	324	NA	NA	127	127	183	183	217	217	159	159	NA	NA	97	97	156	214	69	69	156	156	238	240	139	142	129	129	302	302	157	157	168	171	240	240	64	64	NA	NA	173	173	234	234	150	155	132	132
C13_P9b_11B_1	P9b	308	315	128	131	121	125	183	186	217	220	159	167	143	143	87	97	123	123	69	69	152	172	237	237	NA	NA	129	136	290	302	157	157	165	165	252	252	61	64	140	140	171	212	219	231	150	156	132	135
C13_P9b_11B_4	P9b	308	321	128	131	121	129	183	186	NA	NA	NA	NA	140	140	82	93	190	214	69	69	147	150	NA	NA	139	142	129	129	302	302	157	157	NA	NA	252	255	61	64	139	139	171	189	219	219	NA	NA	NA	NA
C13_P9b_13_1	P9b	315	318	131	131	121	121	186	186	NA	NA	157	175	141	141	82	87	134	217	69	78	150	172	236	236	139	142	129	129	290	302	171	171	165	165	243	243	NA	NA	138	144	189	210	NA	NA	145	155	132	135
C13_P9b_13_4	P9b	308	308	128	131	121	121	186	186	209	220	157	167	NA	NA	82	82	NA	NA	69	69	166	172	NA	NA	142	142	129	129	290	290	163	171	NA	NA	243	249	61	61	138	140	189	210	NA	NA	150	164	132	132
C13_P9b_18_2	P9b	315	315	128	131	125	125	186	186	NA	NA	NA	NA	141	141	82	97	196	196	69	69	159	159	NA	NA	139	142	129	129	290	290	157	157	162	174	243	251	NA	NA	137	137	171	173	231	231	150	150	132	132
C13_P9b_19_3	P9b	315	321	128	131	121	125	183	183	NA	NA	NA	NA	140	140	78	78	134	213	69	69	152	166	237	237	121	142	129	129	302	302	157	157	159	159	251	251	61	61	NA	NA	210	210	214	219	150	156	132	132
C13_P9b_19_4	P9b	315	318	NA	NA	121	125	183	186	217	220	155	159	NA	NA	NA	NA	134	213	69	69	150	172	NA	NA	142	142	129	129	290	290	157	157	165	174	246	249	61	61	138	140	210	210	214	219	156	156	142	142
C13_P9b_24_3	P9b	315	315	NA	NA	121	125	186	186	217	217	NA	NA	134	134	97	97	134	134	69	69	147	172	238	238	121	139	129	129	302	302	163	163	158	165	243	255	NA	NA	NA	NA	173	210	214	219	155	155	NA	NA
C13_P9b_25_2	P9b	315	321	116	131	121	121	183	183	NA	NA	NA	NA	143	143	80	82	134	134	69	69	150	150	236	236	142	142	129	129	290	290	163	163	165	165	240	243	61	61	NA	NA	192	212	219	219	156	156	132	132
C13_P9b_25_3	P9b	315	315	131	131	121	121	183	183	NA	NA	157	167	143	143	82	82	134	214	69	69	152	172	232	238	142	142	129	129	290	290	157	163	NA	NA	243	249	61	61	138	140	167	192	214	219	155	158	135	135
C13_P9b_29_2	P9b	308	308	128	128	121	121	186	186	220	220	155	157	NA	NA	82	82	134	214	69	78	152	166	237	239	142	142	129	129	290	302	163	163	165	174	243	249	61	61	NA	NA	173	210	214	222	NA	NA	132	132
C13_M7b_11_2	M7b	321	321	NA	NA	125	125	171	186	217	217	NA	NA	134	134	86	93	196	196	69	69	152	156	238	238	NA	NA	129	129	302	302	163	166	NA	NA	243	243	64	64	138	142	189	189	214	219	155	155	135	135
C13_M7b_11_4	M7b	321	321	122	128	125	125	177	183	NA	NA	NA	NA	134	134	93	95	196	196	69	69	147	147	238	238	136	138	129	129	302	302	163	166	165	165	243	243	NA	NA	137	137	189	189	214	219	155	155	132	135
C13_M7b_19_1	M7b	315	324	128	128	125	125	174	183	217	217	146	167	136	141	86	86	219	219	52	69	152	152	238	238	138	138	129	145	302	302	163	171	165	168	NA	NA	61	61	138	143	192	192	214	214	145	155	135	135
C13_M7b_19_2	M7b	315	321	NA	NA	125	125	174	177	217	217	146	167	131	144	NA	NA	NA	NA	69	69	147	159	238	238	139	142	129	129	302	302	163	171	165	168	249	252	61	61	139	142	189	189	214	219	155	155	132	135
C13_M7b_2_1	M7b	321	324	116	128	125	125	186	186	217	217	NA	NA	136	144	86	86	196	223	69	73	NA	NA	238	238	142	146	129	145	302	302	163	163	168	168	249	251	NA	NA	142	142	171	171	214	219	145	155	NA	NA
C13_M7b_2_3	M7b	321	321	116	128	125	125	186	186	217	217	146	146	141	141	86	86	223	223	69	73	152	152	238	238	142	146	NA	NA	302	302	163	171	168	171	243	251	61	61	NA	NA	171	171	214	219	155	155	122	135
C13_M7b_6_2	M7b	321	324	128	131	122	127	183	183	NA	NA	151	155	140	140	NA	NA	223	223	69	69	182	182	238	238	NA	NA	129	145	302	302	163	171	168	168	243	255	61	61	NA	NA	185	185	214	217	145	157	132	132
C13_M7b_8_3	M7b	312	315	NA	NA	121	125	183	186	NA	NA	146	171	138	140	86	93	196	223	69	73	182	182	238	238	NA	NA	129	129	290	302	NA	NA	165	171	NA	NA	61	73	143	143	185	185	217	219	145	157	132	132
C13_P1a_13_4	P1a	312	321	NA	NA	122	122	183	183	220	220	159	159	129	129	87	87	214	214	69	78	152	152	240	240	139	142	129	129	302	302	NA	NA	174	174	255	255	61	61	139	139	189	189	219	219	156	156	122	122
C13_P1a_18_2	P1a	308	315	NA	NA	121	129	183	186	220	220	NA	NA	129	154	87	87	214	214	52	52	152	152	240	240	NA	NA	129	129	290	302	157	163	159	159	255	255	61	61	137	137	189	189	219	219	157	156	128	135
C13_P1a_25B_3	P1a	312	321	128	131	131	131	183	183	220	220	159	159	129	129	87	87	214	214	73	79	152	152	237	237	149	149	129	150	290	290	157	163	165	174	255	255	NA	NA	NA	NA	189	189	219	219	157	157	122	128
C13_P1a_27_3	P1a	312	321	128	128	129	129	183	186	220	220	155	159	129	129	87	87	150	214	NA	NA	152	152	240	240	NA	NA	129	129	290	302	157	163	165	174	255	255	61	61	NA	NA	171	189	219	219	157	157	122	142
C13_P1a_31_2	P1a	308	321	128	131	122	122	183	183	220	220	155	159	143	143	87	87	214	214	52	52	152	152	240	240	NA	NA	129	129	302	302	157	157	174	174	249	249	61	61	NA	NA	189	189	219	219	156	156	135	142
C13_P9a_30_4	P9a	321	321	119	128	129	129	183	183	220	220	155	163	140	154	83	87	NA	NA	69	73	150	150	236	236	139	142	129	129	290	302	163	163	NA	NA	NA	NA	64	64	140	140	189	189	214	226	145	158	122	142
C13_P9a_38_2	P9a	308	315	128	128	122	131	180	183	NA	NA	NA	NA	141	145	83	83	159	218	69	69	137	150	234	234	121	142	129	129	290	302	157	163	165	171	240	240	64	64	NA	NA	NA	NA	214	222	145	155	132	142
C13_P9a_4_3	P9a	315	321	128	128	129	129	177	180	217	217	155	159	141	145	83	87	153	153	69	69	150	159	236	236	NA	NA	129	129	290	302	160	163	158	158	249	249	61	64	NA	NA	171	192	214	231	155	158	132	135
C13_P9a_40_1	P9a	312	315	128	128	121	121	180	186	217	217	155	167	138	140	87	87	218	220	69	69	150	160	236	239	139	139	129	129	302	302	163	163	165	171	249	249	61	61	140	140	171	171	214	214	155	158	122	132
C13_P9a_40_3	P9a	308	312	128	128	121	129	NA	NA	217	226	155	163	140	140	87	87	215	220	73	73	150	150	238	238	139	142	129	129	302	302	157	163	165	165	NA	NA	NA	NA	140	141	171	189	214	222	155	155	122	122
C13_P9a_42_2	P9a	321	321	131	131	121	121	186	186	NA	NA	155	163	129	129	83	97	153	159	73	73	150	150	236	238	139	142	129	129	302	302	157	157	159	165	249	249	64	64	NA	NA	167	201	214	222	145	158	122	135
C13_P9a_6_2	P9a	315	318	128	128	129	129	183	183	220	226	147	147	NA	NA	87	87	153	153	69	73	150	150	238	238	NA	NA	129	129	302	302	148	157	165	165	249	249	64	64	NA	NA	188	189	214	214	155	158	135	142
C13_P9a_9_2	P9a	308	315	116	128	121	129	180	180	217	220	146	155	141	141	87	87	162	215	69	69	150	150	NA	NA	121	142	129	129	290	290	163	163	165	165	240	249	NA	NA	137	140	167	167	214	222	155	155	135	135
C13_M6a_10_1	M6a	321	321	111	125	121	125	171	177	209	220	159	159	129	134	93	97	195	217	69	69	150	152	235	235	NA	NA	129	129	290	302	160	163	NA	NA	243	245	61	64	137	137	189	189	217	219	155	155	132	135
C13_M6a_10_2	M6a	321	321	119	128	125	125	171	183	220	220	159	159	129	129	87	93	196	217	69	69	145	164	235	235	NA	NA	129	129	302	302	163	163	NA	NA	249	255	NA	NA	137	142	189	189	214	214	155	158	122	135
C13_M6a_10_3	M6a	321	321	111	125	121	125	171	177	209	220	146	159	129	136	87	93	196	196	69	69	152	156	235	235	121	142	129	129	302	302	163	163	165	168	255	265	61	64	137	140	189	194	217	219	155	158	132	135
C13_M6a_11_1	M6a	321	321	111	128	121	125	171	183	197	220	146	146	134	134	87	87	213	217	69	69	168	168	235	235	142	146	129	129	290	302	163	163	165	168	255	265	61	61	NA	NA	167	167	217	217	155	155	132	135
C13_M6a_3_1	M6a	315	321	NA	NA	125	125	171	183	220	220	NA	NA	129	137	87	93	213	213	NA	NA	145	152	NA	NA	138	146	129	129	290	302	163	163	165	165	249	251	NA	NA	NA	NA	167	194	219	226	150	155	NA	NA
C13_M6a_8_4	M6a	321	321	NA	NA	121	121	174	177	NA	NA	146	146	129	134	87	87	196	196	69	69	152	152	234	234	NA	NA	129	129	302	302	163	163	NA	NA	265	265	64	64	138	138	194	194	219	219	157	157	132	132
C13_M6a_9_2	M6a	315	321	NA	NA	121	121	183	186	220	226	NA	NA	137	137	87	87	196	217	69	69	147	152	235	239	NA	NA	129	139	302	302	NA	NA	165	165	255	255	64	64	138	140	189	189	214	219	150	157	132	132
C13_M6a_9_3	M6a	305	315	NA	NA	125	125	171	186	217	226	163	166	129	137	87	95	156	196	69	69	145	145	235	235	NA	NA	129	139	290	302	160	163	165	165	249	255	61	64	138	142	192	192	214	222	150	155	132	132
C13_P10a_10_1	P10a	315	321	128	131	121	121	183	183	223	223	159	159	140	140	87	97	214	214	69	73	147	147	236	236	142	142	129	129	302	302	160	163	NA	NA	255	255	61	61	140	140	171	210	NA	NA	145	145	142	142
C13_P10a_11_3	P10a	315	321	128	131	122	122	177	180	217	220	146	159	129	144	87	87	214	214	73	73	145	145	236	238	NA	NA	129	129	302	302	160	160	162	165	243	255	61	61	NA	NA	170	198	208	214	145	150	NA	NA
C13_P10a_12_3	P10a	315	321	114	128	122	122	180	183	223	223	NA	NA	140	144	87	97	214	214	73	73	147	152	236	236	136	136	129	129	290	302	163	163	NA	NA	243	255	61	61	NA	NA	171	198	219	222	145	155	NA	NA
C13_P10a_14_2	P10a	315	315	128	131	121	121	177	180	197	197	159	159	129	134	87	87	NA	NA	69	69	145	147	236	236	121	121	129	129	302	302	160	163	177	177	249	255	61	61	NA	NA	171	189	222	231	145	150	NA	NA
C13_P10a_22_2	P10a	315	315	128	131	122	122	183	183	220	223	146	155	134	134	87	87	213	213	69	69	147	152	236	236	121	139	129	129	302	302	163	163	NA	NA	243	255	61	61	NA	NA	170	170	219	219	145	156	132	132
C13_P10a_22_4	P10a	315	315	NA	NA	122	122	177	183	220	226	NA	NA	129	134	87	87	214	214	69	73	147	152	236	238	139	142	129	129	302	302	163	166	162	165	240	255	61	61	NA	NA	171	171	219	222	145	158	135	142
C13_P10a_28_2	P10a	312	321	NA	NA	121	121	183	183	223	223	166	170	137	144	87	87	214	214	69	69	147	147	236	236	NA	NA	129	129	302	302	160	160	NA	NA	255	255	61	64	137	142	171	189	214	219	145	155	125	132
C13_P10a_43_1	P10a	312	315	128	128	121	121	177	177	223	223	159	166	129	129	87	87	NA	NA	73	73	145	147	236	236	139	139	129	129	302	302	160	160	165	171	255	255	61	61	137	139	198	198	214	214	145	145	132	132
C13_M8a_16_4	M8a	324	324	128	128	125	125	183	186	197	220	146	146	140	140	95	95	213	213	69	69	154	168	237	237	NA	NA	129	129	302	302	163	163	165	168	249	249	61	61	140	140	192	192	241	241	157	157	138	138
C13_M8a_18_2	M8a	315	321	NA	NA	125	125	177	183	217	217	NA	NA	134	137	87	87	213	223	69	69	168	168	237	237	142	142	129	129	302	302	163	163	165	168	249	249	64	64	138	140	167	167	214	214	155	157	NA	NA
C13_M8a_18_3	M8a	321	321	128	128	121	125	174	183	NA	NA	146	146	NA	NA	95	95	196	196	69	73	152	168	237	243	138	138	129	129	302	302	160	163	NA	NA	243	249	64	64	138	142	167	194	214	214	155	155	138	138
C13_M8a_29_1	M8a	315	315	111	116	125	125	171	177	217	220	146	146	137	137	87	87	NA	NA	69	69	152	156	232	237	NA	NA	129	139	290	302	160	171	165	165	249	249	61	61	NA	NA	194	194	219	219	NA	NA	132	132
C13_M8a_29_2	M8a	315	324	NA	NA	125	125	186	186	NA	NA	NA	NA	137	137	80	87	141	213	69	69	152	168	232	232	NA	NA	129	129	290	302	160	163	165	165	249	249	61	61	140	140	NA	NA	214	219	150	150	132	132
C13_M8a_29_3	M8a	315	315	111	128	121	125	177	186	NA	NA	146	159	137	137	87	89	NA	NA	69	69	147	152	232	238	NA	NA	129	129	290	302	160	163	165	165	249	249	61	61	140	142	189	189	219	219	150	150	132	132
C13_M8a_35_4	M8a	315	315	NA	NA	121	125	180	180	197	197	146	146	NA	NA	89	89	211	213	NA	NA	168	168	238	238	130	155	129	129	290	302	160	160	165	168	249	249	61	64	138	138	194	194	219	219	150	155	132	142
C13_M8a_38_4	M8a	308	321	128	131	125	125	183	186	NA	NA	146	146	137	144	NA	NA	211	213	69	69	145	156	232	232	136	139	129	139	290	290	160	160	168	174	243	249	61	64	NA	NA	170	170	214	214	150	155	132	132
C13_P2b_1_2	P2b	312	312	119	131	121	129	183	183	217	220	156	159	134	141	97	97	156	214	69	73	145	152	NA	NA	139	139	129	129	290	302	151	163	165	165	246	246	64	64	140	140	167	171	214	214	157	157	NA	NA
C13_P2b_25_4	P2b	321	321	114	119	129	129	183	183	217	220	159	159	126	132	97	101	212	214	69	69	145	145	236	238	139	142	129	129	302	302	163	163	165	165	255	255	61	64	140	140	171	192	214	214	145	157	132	135
C13_P2b_28_2	P2b	321	321	NA	NA	129	129	183	183	217	217	159	159	132	132	97	97	211	211	69	69	145	164	238	238	139	139	129	129	290	290	160	160	NA	NA	246	246	61	61	NA	NA	171	189	226	226	145	145	135	135
C13_P2b_31_1	P2b	315	321	114	114	124	128	183	183	220	220	159	159	126	126	97	101	156	156	69	73	147	164	238	238	NA	NA	129	150	NA	NA	163	163	165	165	255	255	64	64	NA	NA	171	171	214	214	145	145	132	135
C13_P2b_31_2	P2b	312	321	NA	NA	125	125	183	183	NA	NA	159	159	132	134	97	101	156	156	NA	NA	164	164	236	236	139	142	129	150	302	302	163	163	165	165	255	255	64	64	138	140	167	171	214	214	145	157	135	135
C13_P2b_33_3	P2b	321	321	114	119	129	129	183	183	NA	NA	159	159	134	139	97	97	156	156	52	69	164	164	236	236	138	138	129	129	302	302	NA	NA	165	165	255	255	61	64	138	138	171	189	214	226	145	157	135	135
C13_P2b_6_1	P2b	321	321	114	131	125	129	183	183	220	220	159	159	139	141	97	97	223	223	98	98	152	164	236	238	NA	NA	129	129	290	302	154	163	165	165	255	255	61	64	NA	NA	167	189	214	214	145	145	132	132
C13_P5b_14_1	P5b	305	324	125	131	125	125	183	183	188	217	146	155	137	141	97	101	217	217	69	69	152	156	NA	NA	139	139	129	136	290	290	160	174	159	174	255	255	61	64	NA	NA	167	171	214	219	145	150	132	132
C13_P5b_22_1	P5b	315	340	116	131	121	121	183	183	220	223	155	155	NA	NA	83	97	215	220	69	69	152	166	NA	NA	127	142	129	136	290	302	160	163	165	168	255	261	61	64	NA	NA	167	189	214	214	150	155	122	135
C13_P5b_8_2	P5b	312	318	125	128	121	125	186	186	188	217	146	155	129	141	87	87	144	144	69	69	152	156	239	239	139	139	129	136	290	302	163	174	NA	NA	234	246	61	61	136	138	167	192	211	226	145	155	132	135
C13_P5b_8_3	P5b	318	321	125	131	125	125	183	186	188	217	NA	NA	126	141	NA	NA	213	217	69	69	147	156	239	239	NA	NA	136	145	302	302	163	163	159	168	234	255	NA	NA	136	138	167	171	NA	NA	158	158	122	132
C13_P6b_1_2	P6b	315	321	122	128	122	127	180	183	189	220	159	159	138	145	87	97	214	214	69	69	176	176	239	239	124	139	129	129	290	302	NA	NA	165	168	249	249	61	64	NA	NA	181	181	214	214	145	145	122	135
C13_P6b_14_4	P6b	321	321	128	131	121	121	174	186	NA	NA	146	151	140	140	83	97	214	214	69	69	150	160	237	237	139	142	139	139	290	302	163	174	165	168	240	240	NA	NA	136	140	167	181	208	219	145	145	135	135
C13_P6b_19_1	P6b	321	321	122	128	125	129	183	183	189	220	155	159	140	140	83	93	224	224	NA	NA	145	160	236	236	133	133	129	150	302	302	NA	NA	165	168	243	249	61	61	137	140	189	189	208	219	145	155	132	135
C13_P6b_19_3	P6b	321	321	116	128	129	129	183	183	217	220	155	159	129	141	83	97	220	220	69	69	145	147	239	239	139	142	129	129	290	302	160	174	165	168	246	261	61	61	134	137	181	189	208	211	145	155	132	135
C13_P6b_21_2	P6b	321	321	NA	NA	121	125	183	183	NA	NA	163	168	146	146	93	97	213	213	69	69	147	152	238	238	NA	NA	129	129	290	302	160	160	168	174	243	255	64	64	NA	NA	NA	NA	211	219	145	145	NA	NA
C13_P6b_8_2	P6b	321	321	128	131	121	125	NA	NA	188	220	159	159	129	140	97	97	214	214	69	69	147	152	NA	NA	124	146	129	129	302	302	148	163	165	171	249	249	61	64	NA	NA	167	167	208	219	NA	NA	NA	NA
C13_P3b_16_2	P3b	315	324	NA	NA	125	125	183	183	217	217	NA	NA	140	140	93	97	215	219	69	69	156	156	240	240	139	142	129	129	302	302	157	160	159	171	243	249	61	61	NA	NA	173	173	219	234	150	150	135	135
C13_P3b_17_1	P3b	315	321	128	131	129	129	186	186	220	223	151	167	134	146	83	91	214	214	69	78	147	160	238	240	142	142	129	129	302	302	157	163	171	180	237	249	NA	NA	NA	NA	185	185	234	234	155	155	135	135
C13_P3b_17_4	P3b	321	324	116	116	125	125	186	186	223	223	167	167	141	146	83	83	NA	NA	NA	NA	152	152	238	238	142	142	129	129	302	302	163	163	NA	NA	245	249	NA	NA	142	142	173	173	214	214	155	155	135	135
C13_P3b_26_2	P3b	315	315	116	128	125	125	183	186	NA	NA	155	167	140	140	93	95	214	214	69	69	147	156	239	239	NA	NA	134	134	302	302	157	157	NA	NA	NA	NA	61	61	NA	NA	167	167	238	238	150	150	135	138
C13_P3b_26_3	P3b	315	315	116	116	127	127	183	186	220	220	NA	NA	140	140	95	95	214	214	69	73	156	156	239	239	NA	NA	134	134	NA	NA	157	163	165	165	245	249	61	64	NA	NA	171	198	219	238	150	150	135	135
C13_P3b_27_2	P3b	312	315	NA	NA	125	129	183	183	NA	NA	151	155	134	136	NA	NA	214	214	69	69	156	160	NA	NA	142	142	129	134	302	302	NA	NA	171	171	245	249	61	64	138	142	173	173	234	238	155	155	132	135
C13_P3b_31_3	P3b	321	324	116	122	125	125	183	183	NA	NA	NA	NA	136	144	93	97	214	214	69	69	147	152	NA	NA	142	142	129	134	290	302	157	163	NA	NA	249	249	61	61	144	144	167	167	214	234	150	155	132	132
C13_P3b_36_4	P3b	315	315	NA	NA	125	125	183	183	223	223	NA	NA	144	146	97	97	214	214	NA	NA	160	160	236	236	NA	NA	129	134	302	302	163	163	NA	NA	245	245	NA	NA	137	144	167	185	234	234	155	155	135	138
C13_P9b_1_1	P9b	308	315	131	131	121	130	183	183	217	220	157	159	146	146	80	97	134	214	78	78	172	172	NA	NA	139	142	129	129	302	302	NA	NA	165	168	240	245	61	61	NA	NA	167	210	NA	NA	150	150	NA	NA
C13_P9b_1_2	P9b	308	318	131	131	121	121	183	183	217	220	159	167	NA	NA	97	97	214	217	78	78	152	172	NA	NA	110	142	129	129	290	290	163	163	NA	NA	245	255	61	61	NA	NA	167	167	NA	NA	NA	NA	NA	NA
C13_P9b_24_1	P9b	308	315	128	131	120	124	183	186	220	220	NA	NA	NA	NA	97	97	134	134	69	69	172	172	236	238	NA	NA	129	129	290	302	157	163	165	168	243	255	61	61	139	139	173	210	NA	NA	155	155	132	132
C13_P9b_29_4	P9b	308	308	131	131	121	121	183	186	220	223	155	157	134	140	NA	NA	134	214	69	69	166	172	NA	NA	121	142	129	150	290	290	163	171	165	168	243	251	61	64	137	140	171	192	NA	NA	155	155	132	132
C13_M7b_11_1	M7b	321	324	122	122	117	125	183	186	217	217	146	151	134	134	86	86	195	195	69	69	147	147	238	238	NA	NA	129	129	302	302	163	166	NA	NA	234	243	NA	NA	NA	NA	167	167	NA	NA	155	155	122	132
C13_M7b_12_1	M7b	321	324	116	128	121	121	183	186	217	223	NA	NA	136	136	NA	NA	211	211	69	69	152	160	236	238	142	146	129	129	290	302	163	166	NA	NA	234	249	64	64	137	140	185	185	214	217	155	157	132	135
C13_M7b_26_2	M7b	315	321	128	128	125	125	171	186	217	217	146	151	137	146	86	86	195	195	69	69	152	160	238	238	142	142	129	129	302	302	NA	NA	168	168	NA	NA	61	61	NA	NA	185	185	NA	NA	150	155	135	138
C13_M7b_7_3	M7b	321	321	125	128	121	125	186	186	212	217	151	155	134	144	86	97	196	196	69	69	NA	NA	231	238	138	138	NA	NA	302	302	171	171	NA	NA	243	255	61	61	138	142	185	185	214	214	155	158	135	135
C13_P1a_12_1	P1a	312	315	128	131	131	131	183	186	NA	NA	NA	NA	129	143	87	87	214	214	69	79	152	152	240	240	136	136	129	129	302	302	160	163	165	165	255	255	61	64	NA	NA	189	189	214	219	NA	NA	122	128
C13_P1a_16_4	P1a	312	321	128	131	NA	NA	183	183	NA	NA	NA	NA	129	154	87	87	150	217	73	78	152	152	240	240	136	142	129	129	302	302	163	163	165	174	252	255	61	61	NA	NA	189	189	NA	NA	NA	NA	122	135
C13_P1a_31_1	P1a	321	321	131	131	122	122	183	186	NA	NA	NA	NA	NA	NA	87	87	214	214	69	69	152	152	240	240	136	136	129	129	302	302	157	157	NA	NA	249	255	61	61	NA	NA	189	189	214	219	156	156	122	142
C13_P1a_31_3	P1a	321	321	NA	NA	131	131	186	186	220	220	159	159	143	154	87	87	214	214	69	69	152	152	240	240	NA	NA	129	150	302	302	NA	NA	NA	NA	249	255	61	64	NA	NA	189	189	219	219	156	157	142	142
C13_P1a_35_2	P1a	321	321	131	131	NA	NA	183	186	220	220	159	159	143	143	87	87	214	214	73	73	152	152	240	240	136	136	129	150	302	302	NA	NA	165	174	255	255	61	64	NA	NA	171	189	219	219	156	158	122	122
C13_P1a_35_3	P1a	321	321	NA	NA	131	131	183	186	220	220	NA	NA	143	143	87	87	214	214	69	73	152	152	240	240	136	136	129	129	302	302	157	163	165	174	255	255	61	64	NA	NA	171	189	NA	NA	158	158	122	122
C13_P9a_10_3	P9a	315	315	NA	NA	121	121	186	186	220	220	163	163	141	146	83	87	215	215	69	69	150	150	238	238	121	139	NA	NA	302	302	157	160	NA	NA	249	249	64	64	140	141	189	189	222	222	158	158	122	122
C13_P9a_11_1	P9a	308	321	128	128	129	129	183	186	NA	NA	NA	NA	138	140	87	97	NA	NA	NA	NA	150	160	234	237	139	142	NA	NA	290	290	157	163	165	171	240	249	64	64	NA	NA	NA	NA	214	214	145	155	122	135
C13_P9a_42_3	P9a	315	321	128	131	121	129	183	186	217	217	155	155	140	140	NA	NA	153	153	NA	NA	150	150	238	238	139	142	129	129	302	302	157	163	165	165	NA	NA	64	64	137	140	189	189	NA	NA	145	155	135	135
C13_P9a_6_1	P9a	321	321	128	128	129	129	177	183	NA	NA	NA	NA	138	141	83	87	153	214	69	73	150	159	237	237	121	139	129	129	290	302	157	163	165	165	249	249	61	64	137	140	192	192	NA	NA	145	145	122	142
C13_M6a_12_2	M6a	321	321	111	111	120	124	183	183	209	220	146	146	134	136	87	87	196	196	69	69	145	156	232	235	142	142	129	129	290	302	160	163	168	168	255	265	64	69	NA	NA	192	192	217	226	155	157	132	132
C13_M6a_12_3	M6a	321	321	111	122	120	124	171	183	220	220	NA	NA	NA	NA	87	87	196	196	69	69	160	160	232	242	142	142	NA	NA	290	302	160	163	NA	NA	245	255	64	64	NA	NA	189	192	NA	NA	157	158	132	132
C13_M6a_14_1	M6a	321	321	128	128	121	125	186	186	197	220	NA	NA	129	137	95	95	196	196	69	69	145	172	238	238	139	142	129	139	302	302	163	163	165	165	249	255	64	64	139	140	189	194	NA	NA	150	155	135	135
C13_M6a_5_1	M6a	321	321	111	119	121	125	177	177	209	220	146	146	134	137	87	87	195	213	69	69	156	164	235	235	139	142	129	129	302	302	NA	NA	159	168	249	265	61	64	140	142	189	194	NA	NA	NA	NA	132	132
C13_M6a_8_1	M6a	321	321	111	111	121	125	174	177	220	220	NA	NA	134	134	87	87	196	196	69	69	152	152	235	235	NA	NA	NA	NA	302	302	160	163	165	165	245	245	64	64	NA	NA	194	194	214	219	157	157	132	132
C13_P10a_10_2	P10a	315	315	NA	NA	121	121	183	183	NA	NA	NA	NA	129	140	87	97	214	214	69	69	145	147	236	236	136	136	129	129	302	302	163	163	NA	NA	255	255	61	61	137	142	171	171	208	214	145	155	125	142
C13_P10a_43_3	P10a	312	312	128	131	121	121	177	180	223	223	159	166	129	129	87	87	NA	NA	69	69	145	145	236	236	NA	NA	129	129	302	302	160	160	NA	NA	249	255	61	61	NA	NA	171	198	NA	NA	145	150	NA	NA
C13_P10a_43_4	P10a	312	321	128	131	121	121	177	180	217	220	NA	NA	129	140	87	87	214	214	73	73	145	147	236	238	NA	NA	129	129	290	302	160	163	162	162	243	255	61	61	137	139	198	198	214	219	145	150	122	132
C13_P10a_6_3	P10a	315	315	NA	NA	121	142	177	180	223	226	146	170	134	144	87	97	214	214	73	73	147	152	238	238	139	139	129	129	302	302	163	166	NA	NA	240	249	61	61	NA	NA	189	198	214	219	145	158	132	135
C13_M8a_21_3	M8a	315	315	NA	NA	125	125	174	186	NA	NA	146	159	134	137	93	93	211	213	69	69	150	152	237	242	138	142	129	139	302	302	160	163	165	165	249	249	61	64	138	140	189	194	NA	NA	157	157	138	138
C13_M8a_21_4	M8a	315	315	NA	NA	125	125	183	186	220	220	146	146	134	134	NA	NA	213	213	73	73	150	152	238	242	138	138	129	129	290	302	160	163	165	168	249	249	64	64	140	142	189	194	NA	NA	157	157	135	135
C13_M8a_38_1	M8a	308	321	NA	NA	125	125	186	186	NA	NA	NA	NA	137	144	NA	NA	211	213	69	69	147	156	238	238	NA	NA	129	129	302	302	NA	NA	165	165	243	249	61	61	NA	NA	170	170	214	214	150	155	132	132
C13_M8a_43_2	M8a	315	321	NA	NA	130	130	180	180	220	220	NA	NA	134	134	87	87	213	213	78	78	168	168	237	237	142	142	129	139	302	302	171	171	171	171	249	249	61	64	NA	NA	194	194	NA	NA	157	157	142	142
C13_P2b_12_4	P2b	321	321	119	131	124	128	183	183	188	209	159	159	126	141	97	101	156	156	NA	NA	147	164	236	236	138	138	129	129	302	302	154	154	165	165	240	255	NA	NA	NA	NA	167	167	214	214	145	155	135	135
C13_P2b_25_1	P2b	321	321	114	119	121	129	183	183	209	217	159	159	132	141	97	101	214	214	69	69	147	152	236	238	138	142	129	150	302	302	163	163	165	165	255	256	61	64	136	140	167	167	214	214	145	157	132	132
C13_P2b_8_3	P2b	312	312	131	131	125	130	183	183	209	220	NA	NA	126	141	97	101	189	189	75	75	147	164	236	238	139	142	150	150	302	302	NA	NA	NA	NA	255	255	61	61	139	139	171	171	214	214	NA	NA	NA	NA
C13_P5b_13_2	P5b	321	321	NA	NA	121	125	171	183	217	223	146	151	140	146	97	97	NA	NA	78	78	152	160	238	238	139	139	136	145	290	302	157	157	159	165	240	246	61	61	NA	NA	167	181	NA	NA	155	155	132	132
C13_P5b_14_4	P5b	305	321	114	122	125	125	183	183	NA	NA	NA	NA	133	137	97	101	NA	NA	69	69	152	156	239	239	139	142	136	136	290	302	157	160	165	165	240	255	64	64	138	140	167	192	214	226	150	150	132	132
C13_P5b_19_1	P5b	305	318	122	125	121	121	186	186	217	220	NA	NA	133	137	NA	NA	213	223	69	69	147	150	NA	NA	NA	NA	NA	NA	NA	NA	NA	NA	162	165	NA	NA	61	64	141	141	171	171	NA	NA	145	150	135	142
C13_P6b_3_2	P6b	321	321	111	131	121	125	183	183	NA	NA	151	159	NA	NA	83	101	214	214	73	73	147	164	239	239	NA	NA	136	139	302	302	148	160	159	174	249	249	61	61	140	142	167	167	214	214	155	155	NA	NA
C13_P6b_31_2	P6b	305	312	NA	NA	121	121	171	183	220	223	NA	NA	NA	NA	97	97	214	214	69	78	145	152	239	239	139	142	129	145	290	302	NA	NA	171	171	240	246	61	69	NA	NA	167	167	214	219	145	155	132	132
C13_P3b_26_4	P3b	312	312	116	128	125	125	183	186	217	220	155	155	136	136	NA	NA	214	214	69	69	156	156	239	239	139	139	NA	NA	302	302	157	163	NA	NA	NA	NA	61	64	NA	NA	167	167	238	238	150	155	138	138
C13_P3b_27_1	P3b	315	315	116	116	125	125	183	183	NA	NA	151	151	134	141	91	91	219	219	73	73	160	160	236	240	130	130	129	129	302	302	NA	NA	171	171	249	249	61	64	140	142	167	173	NA	NA	155	155	132	132
C13_P3b_27_3	P3b	315	315	116	122	124	128	183	183	220	220	151	155	141	141	91	91	214	214	73	73	160	160	236	240	130	142	129	129	302	302	169	169	NA	NA	245	249	61	61	139	139	167	173	NA	NA	155	155	132	132
C13_P3b_36_2	P3b	315	324	116	128	127	127	183	186	217	223	NA	NA	140	144	87	87	214	214	73	73	160	160	NA	NA	142	142	NA	NA	302	302	157	163	159	171	245	249	61	64	NA	NA	185	185	NA	NA	155	155	132	132
C14_P9b_19_3	P9b	308	318	116	131	121	121	183	186	217	217	NA	NA	NA	NA	82	82	214	214	69	69	166	172	236	236	121	142	129	129	290	302	157	157	159	165	246	255	61	61	140	140	167	210	219	219	150	156	142	142
C14_P9b_23_3	P9b	308	318	NA	NA	121	121	183	183	217	220	159	164	134	141	78	97	214	214	69	69	152	172	NA	NA	NA	NA	129	129	290	302	163	163	165	168	245	255	61	61	140	140	167	167	NA	NA	NA	NA	142	142
C14_P9b_26_3	P9b	308	318	131	131	122	122	183	183	217	220	NA	NA	134	146	97	97	214	217	69	69	NA	NA	236	236	139	142	129	129	290	302	157	163	NA	NA	245	249	61	61	NA	NA	189	210	NA	NA	150	155	132	142
S14_M7b_19_2	M7b	315	321	NA	NA	121	125	171	174	217	217	146	167	131	131	87	97	211	213	69	69	152	182	238	238	139	142	129	129	302	302	163	171	165	165	243	249	61	73	140	142	189	192	NA	NA	155	155	132	135
C14_M7b_28_3	M7b	321	324	122	128	121	125	171	186	217	217	146	151	134	137	87	87	213	219	69	69	152	160	238	238	138	146	129	129	302	302	163	163	165	168	243	255	61	64	142	142	173	173	214	219	NA	NA	132	135
C14_P1a_13_3	P1a	312	321	128	128	121	121	183	183	NA	NA	159	159	129	129	NA	NA	214	214	69	78	152	152	240	240	142	149	129	129	302	302	160	163	174	174	255	255	61	61	NA	NA	189	189	219	219	156	156	122	128
C14_P1a_33_3	P1a	308	321	128	131	122	131	183	186	220	220	146	159	129	141	87	93	214	217	73	73	152	152	240	240	136	136	129	129	302	302	157	163	NA	NA	255	255	61	64	NA	NA	189	189	214	219	NA	NA	128	128
C14_P1a_35_3	P1a	312	321	128	131	122	122	183	183	220	220	155	159	143	143	NA	NA	214	214	73	73	152	152	240	240	136	136	129	129	302	302	163	163	NA	NA	255	255	61	64	139	139	189	189	219	228	158	158	122	142
C14_P1a_5_3	P1a	321	321	NA	NA	121	129	183	183	220	220	146	159	NA	NA	87	87	214	214	73	79	152	152	240	240	136	136	129	150	302	302	157	163	NA	NA	255	255	NA	NA	NA	NA	189	189	NA	NA	157	157	122	142
C14_P9a_38_2	P9a	315	315	128	128	121	129	180	183	220	220	147	163	136	145	83	83	153	209	73	73	150	150	238	238	NA	NA	129	129	290	302	157	157	165	171	240	240	61	61	137	140	192	192	214	219	155	158	132	142
C14_P9a_43_3	P9a	315	315	128	128	128	128	NA	NA	215	217	155	159	138	138	83	83	220	220	69	69	160	160	238	238	139	142	129	129	290	302	157	163	174	174	240	240	61	61	NA	NA	189	189	214	214	155	155	122	135
C14_M6a_10_2	M6a	321	321	NA	NA	120	124	NA	NA	NA	NA	NA	NA	134	136	87	93	196	196	69	69	NA	NA	NA	NA	142	142	129	139	290	302	160	163	NA	NA	NA	NA	61	64	136	139	189	194	NA	NA	155	157	NA	NA
C14_M6a_12_3	M6a	315	321	NA	NA	121	125	171	171	209	217	NA	NA	NA	NA	NA	NA	196	196	69	69	150	152	235	237	142	146	129	139	302	302	160	163	165	168	255	265	64	64	138	139	189	194	NA	NA	150	155	132	132
C14_M6a_6_3	M6a	321	321	111	125	125	125	171	183	220	220	NA	NA	NA	NA	87	95	196	196	69	69	150	152	238	238	121	142	129	139	302	302	163	163	165	165	249	255	64	69	140	140	194	194	214	219	155	155	132	132
C14_M6a_7_2	M6a	321	321	111	128	121	121	183	183	220	220	146	146	129	134	87	87	211	211	69	69	152	168	235	235	146	146	NA	NA	302	302	163	163	165	168	243	255	64	73	NA	NA	167	189	NA	NA	155	155	122	132
C14_P10a_28_3	P10a	305	315	122	131	122	122	177	183	223	223	159	166	129	137	87	97	214	214	69	73	147	147	238	238	136	142	129	150	290	302	160	163	NA	NA	243	255	NA	NA	NA	NA	189	198	214	231	NA	NA	125	135
C14_P10a_37_3	P10a	315	315	128	128	121	121	180	180	217	217	NA	NA	129	129	87	87	214	214	73	73	147	147	236	236	139	139	129	129	302	302	160	160	NA	NA	249	249	61	61	NA	NA	174	210	219	219	145	145	132	135
C14_M8a_22_3	M8a	315	315	122	128	121	125	180	186	220	220	NA	NA	137	137	87	87	213	213	69	69	147	147	238	238	142	155	129	129	290	302	NA	NA	NA	NA	249	249	NA	NA	138	140	194	194	214	219	150	150	138	142
C14_P2b_10_2	P2b	321	321	114	131	125	129	183	183	209	217	NA	NA	126	129	97	101	220	223	69	69	147	155	236	238	139	142	129	129	302	302	NA	NA	NA	NA	NA	NA	64	64	NA	NA	167	189	214	238	145	145	132	135
C14_P2b_12_2	P2b	321	321	131	131	125	125	183	183	NA	NA	NA	NA	129	129	100	100	156	156	69	69	NA	NA	236	236	139	142	129	129	302	302	160	163	NA	NA	246	255	61	64	138	144	167	189	214	214	145	155	132	135
C14_P2b_12_3	P2b	321	321	131	131	125	129	183	183	209	220	156	159	129	132	97	101	211	223	69	69	147	155	236	236	139	139	NA	NA	290	302	NA	NA	165	168	246	255	NA	NA	NA	NA	167	189	214	214	155	155	132	135
C14_P2b_34_3	P2b	321	321	114	119	125	129	183	183	220	220	NA	NA	126	132	NA	NA	144	189	69	69	145	164	238	238	NA	NA	129	145	302	302	NA	NA	NA	NA	255	255	61	64	138	144	171	171	214	214	145	145	135	135
C14_P5b_26_3	P5b	305	321	NA	NA	121	121	183	183	220	223	NA	NA	129	137	83	83	220	220	73	78	147	160	232	239	139	142	136	136	290	290	160	163	NA	NA	240	255	61	64	137	140	167	167	NA	NA	NA	NA	122	122
C14_P5b_8_2	P5b	318	321	125	128	121	121	NA	NA	217	220	NA	NA	132	141	87	87	144	144	69	69	145	156	232	239	NA	NA	129	145	302	302	160	163	168	168	234	255	61	61	136	138	167	167	208	226	145	155	122	135
C14_P5b_8_3	P5b	315	318	131	131	124	128	186	186	217	217	NA	NA	129	132	83	97	213	223	69	73	150	156	237	239	NA	NA	129	129	290	302	160	163	NA	NA	240	246	64	64	139	143	167	171	NA	NA	150	158	122	132
C14_P6b_14_2	P6b	312	321	122	128	116	120	174	183	188	220	NA	NA	140	140	NA	NA	214	220	69	73	150	179	NA	NA	124	139	129	129	290	302	160	163	165	168	240	254	61	61	NA	NA	167	181	214	219	145	145	132	132
C14_P3b_11_3	P3b	315	315	116	128	121	125	186	186	220	220	167	167	NA	NA	NA	NA	215	219	NA	NA	NA	NA	NA	NA	136	142	NA	NA	302	302	157	163	NA	NA	237	240	61	64	144	144	173	173	NA	NA	155	155	NA	NA
C14_P3b_15_3	P3b	315	324	116	128	121	121	186	186	217	220	155	155	NA	NA	91	97	214	214	73	78	NA	NA	236	238	142	142	NA	NA	302	302	157	169	168	171	249	249	61	64	137	144	167	167	214	214	155	155	NA	NA
C14_P3b_17_2	P3b	321	321	128	131	125	125	186	186	220	223	NA	NA	134	146	83	93	214	214	78	78	152	160	NA	NA	142	142	129	129	302	302	157	163	171	171	237	249	61	64	NA	NA	171	198	214	214	145	155	132	135
C14_P3b_28_2	P3b	315	324	116	131	125	125	183	183	217	217	NA	NA	NA	NA	97	97	156	214	69	69	147	147	NA	NA	139	142	129	129	302	302	157	157	168	171	240	249	61	61	137	142	173	173	234	234	NA	NA	132	132
C14_P3b_36_3	P3b	315	315	NA	NA	125	125	183	186	217	223	NA	NA	140	144	87	97	214	214	73	73	147	160	236	236	142	142	129	129	302	302	NA	NA	165	171	245	245	61	61	137	137	167	185	234	234	155	155	132	135
S14_P9b_18_2	P9b	315	318	128	128	121	129	183	186	217	220	NA	NA	141	141	82	97	170	196	69	69	152	159	237	237	142	142	NA	NA	290	290	160	163	159	174	243	251	NA	NA	137	137	171	173	219	231	150	158	132	132
S14_M6a_5_2	M6a	321	321	111	128	120	124	171	177	197	209	146	146	129	136	87	93	195	195	69	69	145	156	235	235	139	142	129	139	290	302	160	163	165	168	255	265	61	64	NA	NA	194	194	NA	NA	155	155	132	132
S14_P10a_2_2	P10a	315	321	128	128	122	122	177	180	223	223	155	159	137	137	NA	NA	214	214	69	69	147	147	236	236	139	142	129	129	302	302	163	163	177	177	249	255	61	64	NA	NA	171	189	NA	NA	145	145	132	132
S14_P10a_22_2	P10a	315	315	128	128	121	121	183	183	197	223	NA	NA	134	134	NA	NA	214	214	73	73	147	147	236	236	121	139	129	129	302	302	160	163	162	177	243	255	61	64	137	139	210	210	222	231	145	145	132	135
S14_P10a_25_2	P10a	315	324	128	128	121	129	177	180	220	223	NA	NA	144	144	87	97	214	214	69	69	147	147	236	236	136	142	NA	NA	302	302	160	160	162	174	240	255	61	61	137	142	198	198	208	214	145	145	132	135
S14_P2b_12_2	P2b	321	321	NA	NA	125	129	183	183	209	220	NA	NA	129	132	97	101	156	218	69	69	147	152	238	238	NA	NA	129	150	302	302	154	163	165	165	246	255	64	64	NA	NA	167	171	NA	NA	155	155	132	135
S14_P5b_15_2	P5b	305	305	128	128	125	129	183	186	220	220	NA	NA	136	136	87	97	214	220	69	69	150	150	236	239	127	139	145	145	290	302	NA	NA	165	168	240	249	61	64	NA	NA	167	167	208	214	150	150	138	142
S14_P3b_11_2	P3b	315	315	116	128	125	125	186	186	220	220	NA	NA	NA	NA	93	97	NA	NA	69	69	147	152	239	239	136	136	129	134	302	302	NA	NA	165	165	237	249	61	61	144	144	189	189	234	234	155	155	132	132
C14_P9b_23_2	P9b	308	318	128	131	122	122	183	183	NA	NA	159	164	137	141	78	93	214	217	69	69	152	172	237	237	142	142	129	129	302	302	157	163	NA	NA	245	255	61	61	139	139	167	170	214	219	150	156	132	142
C14_P10a_43_2	P10a	312	312	128	131	129	129	177	183	217	217	146	159	129	129	87	87	214	214	69	69	145	147	236	238	139	139	129	129	290	302	160	163	NA	NA	NA	NA	61	64	137	139	198	198	214	222	145	145	132	135
C14_M8a_30_2	M8a	315	315	116	128	125	125	171	183	197	217	146	146	129	137	87	95	153	223	69	69	NA	NA	NA	NA	142	155	129	129	290	302	160	160	165	174	243	249	61	61	138	138	194	194	219	219	NA	NA	132	132
S14_P9b_14_2	P9b	308	308	116	128	121	125	183	183	220	220	155	155	NA	NA	82	82	214	214	69	69	NA	NA	237	237	142	142	129	129	302	302	157	163	NA	NA	243	245	61	64	NA	NA	210	210	NA	NA	155	155	132	132
S14_P9b_16_2	P9b	321	321	128	131	121	121	186	186	220	220	159	170	141	146	97	101	134	134	69	69	152	152	238	238	121	142	136	136	290	302	157	163	165	165	251	255	61	64	138	138	171	189	NA	NA	150	158	128	135
S14_P9b_23_1	P9b	308	315	128	131	121	121	183	186	217	220	159	164	137	146	78	82	214	214	69	69	NA	NA	237	237	142	142	129	129	290	302	157	163	NA	NA	245	255	61	61	137	140	167	192	214	219	150	155	132	142
S14_P9b_23_2	P9b	308	318	128	131	121	121	183	183	217	220	159	164	137	146	NA	NA	217	217	NA	NA	152	152	NA	NA	142	142	129	129	290	302	154	163	165	165	246	255	61	61	138	138	167	167	214	219	NA	NA	132	132
S14_P9b_23_3	P9b	308	318	116	131	121	130	183	186	217	220	164	175	141	141	78	97	170	214	69	69	152	166	NA	NA	142	146	129	129	302	302	163	163	165	165	246	251	61	61	139	139	167	192	NA	NA	150	155	132	132
S14_P9b_24_4	P9b	305	321	131	131	125	129	183	183	209	220	156	159	141	141	97	101	223	223	69	69	147	152	236	236	139	139	129	129	302	302	163	163	165	165	255	255	64	64	138	144	167	171	NA	NA	155	157	135	135
S14_M7b_12_1	M7b	315	321	128	128	121	125	183	186	217	217	167	167	131	136	86	86	196	196	69	69	152	152	232	238	142	142	129	145	302	302	NA	NA	165	165	243	243	61	61	138	142	192	192	NA	NA	155	155	138	138
S14_M7b_2_2	M7b	312	321	128	128	121	125	183	186	217	217	167	167	NA	NA	NA	NA	196	223	69	69	182	182	238	238	142	146	129	145	302	302	163	171	168	171	251	251	61	61	142	142	171	189	NA	NA	155	158	132	135
S14_M7b_2_3	M7b	321	321	122	128	125	125	186	186	217	217	146	167	136	144	NA	NA	196	223	69	69	159	182	238	238	136	146	129	145	302	302	163	163	165	165	243	245	61	64	138	142	171	185	208	214	155	155	NA	NA
S14_M7b_22_1	M7b	315	315	116	128	125	125	174	183	217	217	146	146	131	140	86	91	196	196	69	69	147	152	238	238	142	142	139	145	302	302	160	163	NA	NA	243	252	61	64	138	140	185	185	NA	NA	155	155	135	135
S14_M7b_7_1	M7b	315	315	128	131	121	121	177	177	NA	NA	146	170	129	129	87	87	214	214	73	73	147	152	236	236	139	139	129	129	302	302	160	163	162	165	NA	NA	61	61	137	137	189	189	NA	NA	145	145	135	142
S14_P1a_18_4	P1a	315	318	122	128	129	129	183	183	220	226	146	155	136	146	87	87	209	218	73	73	150	150	NA	NA	121	142	129	129	302	302	148	163	NA	NA	NA	NA	61	64	137	137	189	192	214	214	145	155	135	142
S14_P1a_33_1	P1a	321	321	128	131	129	129	183	183	220	220	159	159	141	141	87	97	214	214	73	78	152	152	240	240	136	136	129	129	302	302	NA	NA	165	174	255	255	61	61	137	137	189	189	219	219	157	158	142	151
S14_P1a_35_1	P1a	321	321	131	131	121	121	183	183	220	220	155	159	NA	NA	87	87	214	214	73	73	152	152	240	240	136	136	129	129	302	302	NA	NA	165	174	NA	NA	61	61	137	137	189	189	219	219	156	158	122	142
S14_P1a_4_4	P1a	321	321	128	131	121	121	183	183	220	220	159	159	154	154	87	87	214	214	73	78	152	152	240	240	136	139	129	150	302	302	NA	NA	174	174	NA	NA	NA	NA	NA	NA	189	189	219	219	156	158	122	122
S14_P1a_7_4	P1a	324	324	116	131	122	122	183	183	217	217	159	159	140	146	97	97	156	214	69	69	147	147	238	240	139	142	129	129	302	302	157	157	168	171	240	249	NA	NA	NA	NA	173	173	234	234	150	150	135	135
S14_P1a_9_3	P1a	321	321	131	131	129	129	183	183	220	220	155	155	129	129	87	87	214	214	NA	NA	152	152	240	240	136	136	129	150	290	290	163	163	159	174	255	255	61	64	137	137	189	189	219	228	156	156	135	142
S14_P9a_10_3	P9a	315	315	128	128	121	121	186	186	215	217	163	163	141	146	83	87	215	220	69	69	159	159	238	238	139	142	129	129	302	302	NA	NA	NA	NA	249	261	NA	NA	136	141	192	192	214	222	155	158	122	122
S14_P9a_11_2	P9a	315	315	128	128	121	129	183	186	217	220	147	147	136	138	87	87	153	218	73	73	150	159	NA	NA	139	142	129	129	302	302	163	163	165	165	240	255	NA	NA	141	141	NA	NA	NA	NA	155	155	122	135
S14_P9a_11_3	P9a	321	321	128	131	129	129	183	186	NA	NA	147	155	140	140	NA	NA	209	218	69	73	NA	NA	234	236	139	139	129	129	302	302	NA	NA	NA	NA	249	249	61	64	NA	NA	NA	NA	214	214	155	155	122	135
S14_P9a_29_4	P9a	312	312	131	131	121	121	171	171	220	220	163	163	137	137	87	97	211	211	69	69	147	147	239	239	139	139	150	150	302	302	160	160	165	165	249	249	NA	NA	137	137	174	174	NA	NA	145	145	125	125
S14_P9a_29_4--54	P9a	315	324	128	131	129	129	186	186	197	197	155	155	136	140	83	87	209	220	69	69	150	150	236	236	136	142	129	129	302	302	157	163	165	174	240	249	61	61	140	140	192	192	NA	NA	145	155	122	135
S14_P9a_30_3	P9a	321	321	122	128	129	129	180	183	197	220	163	163	145	154	87	87	153	218	73	73	NA	NA	NA	NA	139	142	129	129	290	302	157	163	165	165	NA	NA	64	69	137	140	189	189	NA	NA	145	158	122	135
S14_P9a_4_1	P9a	315	321	128	128	129	129	177	186	NA	NA	155	159	145	145	87	87	153	153	69	73	159	159	NA	NA	121	142	129	129	290	302	163	163	165	165	240	249	61	61	140	140	192	192	214	222	155	158	122	135
S14_P9a_43_2	P9a	308	315	128	128	121	121	183	186	217	217	155	155	138	140	NA	NA	215	220	NA	NA	NA	NA	234	238	136	136	129	129	302	302	163	163	171	174	240	240	61	61	137	140	189	189	214	214	145	155	132	135
S14_P9a_6_4	P9a	321	321	128	131	121	125	180	183	220	223	159	159	140	140	97	97	211	211	66	73	NA	NA	NA	NA	139	139	129	136	290	290	160	163	171	171	240	246	61	69	137	140	181	189	214	219	145	145	132	132
S14_M6a_10_1	M6a	321	321	111	128	125	125	171	171	209	220	146	159	134	137	NA	NA	196	196	NA	NA	145	145	235	235	121	146	129	129	302	302	163	163	165	168	243	265	61	64	137	140	189	192	NA	NA	158	158	132	135
S14_M6a_10_4	M6a	308	321	128	131	121	129	183	186	220	220	159	159	129	154	87	87	214	214	NA	NA	152	152	NA	NA	136	149	129	129	302	302	163	163	159	174	255	255	61	61	137	137	189	189	219	228	157	157	122	135
S14_M6a_14_1	M6a	321	321	128	128	125	125	171	186	220	220	146	170	137	137	87	95	196	196	69	69	145	150	NA	NA	142	142	129	129	302	302	NA	NA	165	174	NA	NA	61	64	138	139	189	189	NA	NA	155	155	132	135
S14_M6a_14_2	M6a	315	321	111	128	121	125	171	183	220	226	146	163	129	129	NA	NA	196	213	NA	NA	145	152	NA	NA	142	146	129	139	302	302	163	163	165	174	243	243	61	64	NA	NA	189	189	214	219	155	155	132	132
S14_M6a_14_4	M6a	321	321	111	128	125	125	183	186	197	220	146	167	129	137	95	95	196	219	69	69	NA	NA	NA	NA	142	146	129	139	302	302	163	163	168	168	249	255	61	64	138	139	189	194	214	226	145	155	132	132
S14_M6a_3_1	M6a	315	315	111	125	125	125	171	183	220	220	146	146	129	136	87	87	196	196	69	69	152	152	235	238	121	142	129	129	302	302	NA	NA	165	165	243	249	NA	NA	140	140	167	189	214	217	150	155	132	135
S14_M6a_5_1	M6a	321	321	111	131	120	124	177	183	220	220	146	159	129	136	87	93	195	217	69	69	150	150	235	242	142	142	129	129	302	302	160	163	159	165	249	265	61	64	139	139	189	189	214	219	155	155	132	132
S14_M6a_6_2	M6a	321	321	111	111	125	125	183	183	197	197	159	159	134	134	87	95	196	196	69	69	NA	NA	237	237	142	142	129	139	302	302	163	163	168	168	NA	NA	64	64	NA	NA	174	174	219	219	155	155	132	132
S14_M6a_7_1	M6a	321	321	111	128	121	129	183	183	220	220	157	170	129	129	87	87	217	217	69	69	152	168	235	238	142	142	129	139	302	302	160	163	159	165	240	255	64	69	NA	NA	167	189	214	219	155	155	122	132
S14_M6a_7_3	M6a	321	324	128	128	121	125	183	183	220	220	170	170	129	129	87	87	195	211	69	69	NA	NA	NA	NA	133	146	129	139	302	302	160	163	165	165	243	255	64	64	142	142	189	189	219	226	155	155	132	132
S14_M6a_8_1	M6a	321	321	111	111	121	125	171	177	220	220	146	146	129	134	NA	NA	196	196	69	69	150	152	234	239	NA	NA	129	139	302	302	163	163	165	165	NA	NA	61	64	138	140	192	192	219	238	155	155	132	132
S14_M6a_8_2	M6a	321	321	128	128	121	121	174	186	220	220	146	167	129	134	87	87	196	196	69	69	NA	NA	235	235	146	146	129	139	290	302	157	163	165	168	245	245	NA	NA	138	138	189	194	219	226	155	157	132	132
S14_P10a_14_2	P10a	315	315	131	131	121	121	183	183	NA	NA	159	159	129	140	87	87	214	214	69	69	NA	NA	238	238	121	136	129	136	302	302	160	169	177	177	243	243	61	61	NA	NA	171	171	222	231	150	150	132	132
S14_P10a_2_3	P10a	315	315	128	131	121	121	180	180	223	223	155	155	129	137	87	87	214	214	73	73	NA	NA	236	236	121	139	129	129	302	302	160	163	165	165	NA	NA	61	74	137	137	171	189	219	231	145	156	132	142
S14_P10a_21_1	P10a	315	321	119	131	125	125	174	183	189	220	159	163	132	141	97	97	199	213	69	69	152	152	NA	NA	124	142	136	139	290	302	148	160	165	171	240	249	64	64	137	137	171	181	NA	NA	150	155	132	142
S14_P10a_28_1	P10a	305	305	131	131	121	121	177	177	223	223	146	159	137	137	NA	NA	214	214	NA	NA	NA	NA	236	238	136	136	129	136	302	302	NA	NA	162	162	243	249	61	64	137	137	171	189	214	214	145	150	125	135
S14_P10a_28_3	P10a	321	321	114	114	121	121	183	183	223	223	146	146	137	137	87	97	213	213	69	73	NA	NA	238	238	136	136	129	129	302	302	NA	NA	162	165	243	255	61	64	NA	NA	171	189	222	222	145	145	125	125
S14_P10a_37_3	P10a	315	315	128	128	121	121	177	180	217	223	159	159	129	129	87	87	214	214	69	73	NA	NA	236	236	139	139	129	129	302	302	160	163	162	174	249	249	61	64	137	142	174	192	214	219	145	145	132	142
S14_P10a_39_1	P10a	315	315	114	128	121	121	180	180	197	220	155	159	137	144	87	87	214	214	73	73	NA	NA	236	236	121	136	129	129	302	302	NA	NA	162	171	249	252	NA	NA	137	137	198	198	219	222	145	145	135	135
S14_P10a_9_4	P10a	305	321	116	131	129	129	180	180	217	220	155	166	NA	NA	83	88	214	223	69	69	NA	NA	235	235	139	139	129	139	290	302	NA	NA	162	165	240	246	61	64	NA	NA	167	167	217	219	150	150	125	125
S14_M8a_18_3	M8a	315	315	116	128	125	125	183	183	NA	NA	146	146	137	146	87	87	213	213	69	73	NA	NA	237	243	138	152	129	139	302	302	160	163	165	168	249	249	64	64	138	140	167	167	214	231	150	157	132	138
S14_M8a_22_3	M8a	308	315	122	128	125	125	177	180	NA	NA	146	146	129	137	87	87	213	223	69	69	NA	NA	232	237	138	142	129	129	290	302	160	160	168	168	249	249	61	61	138	138	189	194	214	219	150	157	132	135
S14_M8a_22_4	M8a	318	321	128	128	131	131	183	183	197	220	163	163	140	154	87	87	209	215	73	78	150	150	NA	NA	139	142	129	129	290	302	NA	NA	165	174	240	252	64	64	139	141	189	192	NA	NA	158	158	135	142
S14_M8a_30_3	M8a	315	324	111	128	125	125	171	177	217	220	146	146	134	137	87	87	141	153	69	69	147	147	232	232	130	142	129	129	302	302	160	163	165	168	249	249	61	61	137	137	194	194	219	219	NA	NA	132	132
S14_M8a_35_4	M8a	315	315	116	122	125	125	183	183	220	220	151	155	141	141	NA	NA	214	219	73	73	160	160	236	236	130	142	129	129	302	302	NA	NA	165	165	249	249	NA	NA	140	140	167	167	214	214	155	155	132	132
S14_P2b_10_3	P2b	321	321	131	131	125	129	183	183	209	209	159	159	126	126	97	97	156	156	69	69	NA	NA	236	236	139	139	129	150	302	302	163	163	NA	NA	246	255	NA	NA	138	138	167	171	NA	NA	155	155	132	135
S14_P2b_12_4	P2b	315	321	131	131	125	125	171	186	217	220	159	164	NA	NA	NA	NA	134	134	69	69	NA	NA	232	238	121	142	129	129	302	302	160	160	168	174	249	255	61	61	138	138	192	210	NA	NA	155	164	132	135
S14_P2b_21_1	P2b	315	321	131	131	125	129	183	183	209	209	156	159	129	132	97	101	209	209	73	73	145	147	NA	NA	138	138	129	129	290	290	NA	NA	NA	NA	246	249	64	64	136	138	189	189	214	219	155	155	135	135
S14_P2b_23_2	P2b	321	321	128	131	121	129	183	183	220	220	159	159	139	139	97	97	223	234	69	69	147	147	238	238	139	139	129	129	290	302	163	163	165	165	255	255	64	64	136	144	167	167	NA	NA	145	155	128	128
S14_P2b_23_3	P2b	315	315	125	131	129	129	183	183	220	220	159	159	129	129	97	97	209	234	73	73	NA	NA	238	238	139	139	129	129	290	290	160	163	165	165	255	255	64	64	136	138	167	192	214	222	NA	NA	132	135
S14_P2b_31_3	P2b	321	321	125	125	125	129	183	183	220	220	159	159	126	132	101	101	156	156	69	69	164	164	238	238	139	139	129	129	302	302	163	163	165	165	NA	NA	NA	NA	140	140	171	171	214	214	157	157	135	135
S14_P2b_34_1	P2b	321	321	114	114	129	129	183	183	209	217	159	159	132	134	97	101	189	214	69	69	NA	NA	236	236	139	142	129	150	302	302	NA	NA	165	165	246	255	61	61	138	144	167	171	214	214	145	157	135	135
S14_P2b_34_4	P2b	321	321	119	128	125	125	174	183	220	220	159	163	NA	NA	83	101	199	212	69	73	NA	NA	234	234	127	142	136	139	302	302	160	163	165	165	240	249	NA	NA	134	140	167	181	NA	NA	145	155	132	135
S14_P2b_6_1	P2b	315	321	119	119	125	129	183	183	220	220	159	159	132	139	97	97	156	223	NA	NA	145	147	236	236	138	138	129	150	290	290	NA	NA	165	165	246	255	61	64	136	138	167	171	214	219	145	155	132	135
S14_P5b_12_3	P5b	315	315	116	125	125	125	183	186	188	220	146	146	141	141	80	83	213	213	78	78	152	152	NA	NA	139	142	129	136	290	290	163	163	165	174	246	246	64	64	136	136	167	167	214	214	150	158	132	132
S14_P5b_4_4	P5b	315	315	116	116	121	121	186	186	220	220	163	163	146	146	87	87	153	153	73	73	147	147	238	238	142	142	150	150	302	302	160	163	174	174	251	251	61	61	137	137	167	167	NA	NA	155	155	132	132
S14_P5b_8_1	P5b	315	321	122	131	121	121	183	186	188	217	146	159	132	132	83	97	213	213	69	69	147	153	238	238	139	139	129	136	290	302	NA	NA	165	165	240	243	NA	NA	136	139	167	171	NA	NA	155	158	135	135
S14_P6b_11_1	P6b	290	321	122	122	121	121	171	183	189	223	151	159	129	137	83	97	156	215	69	69	150	160	239	239	124	124	129	136	290	302	163	174	168	174	243	249	61	61	138	142	167	189	208	214	155	158	132	135
S14_P6b_17_3	P6b	321	324	125	131	121	129	180	180	188	217	146	156	140	145	83	97	144	220	69	69	NA	NA	NA	NA	127	139	129	129	302	302	NA	NA	165	165	246	249	61	61	134	137	167	167	214	214	145	155	132	135
S14_P6b_31_4	P6b	315	315	116	116	121	121	186	186	220	220	163	163	146	146	87	87	153	153	73	73	NA	NA	238	238	142	142	150	150	302	302	160	160	174	174	251	251	61	61	142	142	167	167	231	231	155	155	132	132
S14_P6b_9_4	P6b	312	321	114	119	125	129	183	183	220	220	159	168	NA	NA	97	101	209	223	69	69	NA	NA	237	239	NA	NA	NA	NA	290	302	163	163	165	165	NA	NA	64	64	138	144	171	171	NA	NA	145	157	NA	NA
S14_P3b_13_1	P3b	308	308	116	116	125	125	183	183	220	220	NA	NA	134	134	93	93	214	214	69	69	152	152	239	239	142	142	129	129	302	302	157	157	NA	NA	249	249	61	61	137	137	167	171	214	214	155	155	132	132
S14_P3b_14_1	P3b	324	324	111	111	125	125	NA	NA	217	220	155	155	134	134	87	91	214	214	69	69	160	160	238	238	139	142	129	129	302	302	157	163	165	165	249	249	61	61	138	142	167	167	208	234	150	155	132	132
S14_P3b_27_1	P3b	315	315	116	116	125	129	183	183	220	220	151	155	NA	NA	91	91	214	219	73	73	160	160	240	240	130	130	NA	NA	302	302	NA	NA	165	171	245	245	64	64	140	142	167	173	214	214	155	155	132	132
S14_P3b_27_4	P3b	315	315	111	116	121	125	180	183	NA	NA	146	146	140	140	89	89	NA	NA	69	69	152	168	238	238	139	155	129	129	302	302	160	160	NA	NA	NA	NA	61	64	137	137	194	194	214	222	150	150	132	132
S14_P3b_28_4	P3b	321	321	131	131	121	121	183	183	220	220	155	159	129	129	87	87	217	217	73	79	NA	NA	240	240	136	136	150	150	302	302	157	163	165	165	252	252	61	64	137	137	189	189	214	219	156	156	122	142
S14_P3b_5_3	P3b	321	321	122	131	121	125	183	186	217	223	155	155	136	146	NA	NA	214	214	69	69	NA	NA	NA	NA	136	139	129	129	302	302	157	157	NA	NA	249	249	NA	NA	142	142	167	171	NA	NA	145	150	132	135
S14_P3b_5_4	P3b	308	308	125	125	121	125	171	171	220	220	155	155	137	137	87	87	199	212	69	69	NA	NA	239	239	142	142	150	150	302	302	163	163	165	165	249	255	64	64	137	137	167	192	NA	NA	155	155	NA	NA
C14_P9b_14_1	P9b	308	308	128	128	NA	NA	186	186	220	220	155	159	134	146	82	87	217	217	69	69	152	152	NA	NA	NA	NA	NA	NA	290	302	160	171	165	165	245	251	61	64	NA	NA	210	210	NA	NA	155	158	132	132
C14_P9b_16_4	P9b	321	321	131	131	NA	NA	186	186	220	223	155	159	146	146	82	82	134	134	69	69	152	152	NA	NA	142	142	136	136	290	302	157	163	165	165	252	255	61	61	NA	NA	189	189	NA	NA	NA	NA	132	132
C14_P9b_24_4	P9b	315	321	116	131	NA	NA	186	186	217	220	155	167	134	134	86	86	134	134	69	69	152	166	236	238	142	142	129	129	290	302	157	160	165	165	249	255	61	64	NA	NA	189	192	214	219	155	158	132	132
C14_P9b_28_2	P9b	308	315	131	131	NA	NA	183	186	217	220	155	159	146	146	80	97	134	134	69	69	152	159	NA	NA	142	142	129	129	290	290	160	163	159	165	251	255	61	64	NA	NA	192	192	NA	NA	NA	NA	NA	NA
C14_M7b_11_3	M7b	321	321	128	128	NA	NA	183	186	217	217	151	167	134	136	87	93	196	196	69	69	152	156	236	238	136	152	NA	NA	290	302	163	171	NA	NA	243	251	61	61	NA	NA	189	189	214	219	145	155	135	135
C14_M7b_12_4	M7b	315	324	116	122	NA	NA	171	171	217	217	151	155	131	131	86	86	219	219	69	69	152	152	236	238	138	142	139	145	290	302	163	171	165	165	243	252	61	61	NA	NA	192	192	217	217	NA	NA	NA	NA
C14_M7b_22_3	M7b	298	315	122	128	NA	NA	171	183	217	217	146	151	136	136	87	95	196	214	69	69	147	182	236	238	136	139	NA	NA	302	302	163	163	165	165	NA	NA	61	64	NA	NA	167	185	214	219	155	155	135	135
C14_M7b_22_4	M7b	315	315	122	128	NA	NA	171	183	217	217	146	151	134	140	NA	NA	196	196	69	69	182	182	238	238	142	142	129	139	302	302	163	166	NA	NA	243	243	61	61	NA	NA	185	192	214	219	155	155	122	135
C14_M7b_7_1	M7b	315	321	128	131	NA	NA	186	186	NA	NA	146	167	134	144	NA	NA	219	219	69	69	152	182	232	238	142	142	NA	NA	290	302	163	171	NA	NA	243	251	61	64	NA	NA	185	189	214	214	145	155	135	138
C14_P1a_18_3	P1a	308	308	128	128	NA	NA	183	186	220	220	159	159	129	129	87	87	214	214	79	79	152	152	240	240	149	149	NA	NA	302	302	163	163	165	165	NA	NA	61	64	NA	NA	189	189	NA	NA	155	155	135	135
C14_P1a_31_1	P1a	321	321	131	131	NA	NA	183	183	220	220	155	155	143	154	87	87	214	214	69	73	152	152	240	240	136	136	129	150	302	302	157	163	165	174	255	255	61	64	137	137	189	189	219	219	155	155	122	135
C14_P1a_4_3	P1a	321	321	128	131	NA	NA	183	183	220	220	155	159	NA	NA	87	87	214	214	69	69	152	152	240	240	136	136	NA	NA	302	302	157	163	165	165	255	255	61	64	NA	NA	189	189	219	219	156	156	122	135
C14_P1a_7_1	P1a	321	321	131	131	NA	NA	186	186	220	220	155	159	129	143	87	87	217	217	79	79	152	152	NA	NA	136	136	150	150	302	302	163	163	NA	NA	NA	NA	61	64	NA	NA	189	189	NA	NA	145	157	122	122
C14_P1a_7_2	P1a	321	321	128	131	NA	NA	183	186	220	220	155	155	129	141	87	87	214	217	NA	NA	152	152	NA	NA	136	136	129	150	290	302	157	163	177	177	NA	NA	NA	NA	137	137	189	189	219	219	157	157	142	142
C14_P1a_7_3	P1a	321	321	128	131	NA	NA	183	186	220	220	155	159	129	143	87	87	214	214	69	79	152	152	240	240	136	136	NA	NA	302	302	157	157	NA	NA	252	255	61	64	142	145	189	189	NA	NA	NA	NA	128	128
C14_P1a_9_4	P1a	321	321	128	131	NA	NA	183	183	220	220	155	159	129	129	87	87	150	217	NA	NA	152	152	240	240	136	139	129	150	302	302	163	163	159	174	NA	NA	61	61	140	140	189	189	219	228	157	157	128	128
C14_P9a_11_1	P9a	321	321	128	128	NA	NA	186	186	217	220	147	163	138	138	87	87	215	218	NA	NA	150	150	234	238	139	142	129	129	290	302	163	163	165	171	240	240	61	61	NA	NA	171	171	NA	NA	NA	NA	122	135
C14_P9a_29_3	P9a	315	324	122	131	NA	NA	180	186	197	220	163	167	136	136	87	97	165	220	69	73	150	160	236	238	139	142	NA	NA	302	302	163	163	165	174	240	252	NA	NA	NA	NA	192	192	NA	NA	NA	NA	122	122
C14_P9a_40_2	P9a	308	321	128	128	NA	NA	183	183	217	220	155	155	136	144	87	87	220	220	69	73	150	160	236	238	139	139	129	129	302	302	163	163	165	174	240	249	61	61	NA	NA	189	189	214	222	145	155	NA	NA
C14_P9a_40_3	P9a	312	321	128	128	NA	NA	183	186	197	217	146	167	129	136	80	87	218	220	NA	NA	150	160	236	238	139	142	129	129	302	302	148	163	165	174	NA	NA	61	61	NA	NA	192	192	214	222	NA	NA	NA	NA
C14_M6a_11_3	M6a	321	321	111	119	NA	NA	171	183	197	220	146	146	134	134	87	87	217	217	69	69	168	168	235	235	142	146	NA	NA	302	302	163	163	NA	NA	249	255	NA	NA	NA	NA	167	194	NA	NA	155	155	132	135
C14_M6a_12_1	M6a	315	321	111	111	NA	NA	171	171	209	226	146	163	129	137	87	87	196	196	69	69	145	150	235	235	142	146	129	139	302	302	160	163	168	168	255	265	61	64	NA	NA	189	194	214	214	NA	NA	NA	NA
C14_M6a_3_4	M6a	321	321	119	119	NA	NA	171	183	220	220	146	146	129	129	87	87	196	196	69	69	152	152	238	238	121	138	NA	NA	302	302	163	163	165	165	249	251	64	64	NA	NA	194	194	214	226	NA	NA	132	135
C14_M6a_8_2	M6a	321	321	111	111	NA	NA	177	183	220	220	146	163	129	129	87	97	196	213	69	69	150	152	NA	NA	133	142	129	129	302	302	163	163	159	168	243	265	NA	NA	138	140	192	192	214	219	155	157	132	132
C14_M6a_9_3	M6a	315	321	NA	NA	NA	NA	183	183	220	226	146	163	NA	NA	87	87	196	213	69	69	147	152	NA	NA	139	142	129	139	302	302	163	163	168	168	249	255	61	61	NA	NA	189	189	214	214	155	155	122	132
C14_P10a_2_4	P10a	308	315	128	131	NA	NA	177	183	223	223	146	155	129	137	87	97	213	213	69	69	147	147	236	236	121	121	NA	NA	302	302	160	163	162	177	255	255	61	61	NA	NA	NA	NA	208	231	145	156	132	138
C14_P10a_21_1	P10a	315	315	128	128	NA	NA	177	183	223	223	159	170	129	144	87	87	214	214	69	73	147	147	236	236	139	139	NA	NA	302	302	160	163	162	177	NA	NA	61	61	NA	NA	189	192	209	222	145	145	135	142
C14_P10a_25_4	P10a	315	321	128	128	NA	NA	177	180	NA	NA	155	159	144	144	87	87	214	214	69	73	147	147	236	236	139	139	129	129	302	302	160	160	162	162	255	255	NA	NA	NA	NA	NA	NA	208	219	145	145	135	135
C14_P10a_43_4	P10a	312	312	128	131	NA	NA	177	180	223	223	159	159	129	129	87	87	214	214	69	69	145	147	236	238	121	139	NA	NA	302	302	160	160	162	177	249	255	61	61	NA	NA	171	198	NA	NA	NA	NA	132	132
C14_M8a_31_2	M8a	315	321	128	128	NA	NA	180	183	197	197	146	146	134	137	80	87	NA	NA	69	69	147	147	NA	NA	139	139	NA	NA	302	302	160	160	NA	NA	249	249	61	61	138	138	194	194	219	222	150	157	132	132
C14_M8a_35_1	M8a	315	321	111	111	NA	NA	180	183	197	220	146	157	134	146	87	89	213	223	69	69	150	168	238	238	142	155	129	129	302	302	160	171	165	168	243	249	61	64	137	137	170	194	219	219	150	150	132	138
C14_P2b_11_3	P2b	315	321	119	119	NA	NA	183	186	209	209	156	159	132	139	97	97	211	220	69	69	147	152	NA	NA	142	142	129	129	290	302	151	160	162	165	255	255	NA	NA	NA	NA	167	189	214	234	NA	NA	132	132
C14_P2b_23_4	P2b	315	324	131	131	NA	NA	183	183	220	220	156	159	129	139	97	97	234	234	69	69	152	152	238	238	139	139	NA	NA	290	290	160	163	165	165	243	255	NA	NA	NA	NA	167	167	214	222	157	157	128	128
C14_P2b_3_2	P2b	315	321	114	131	NA	NA	183	183	NA	NA	156	159	126	132	97	101	209	223	69	69	145	155	236	238	139	142	129	129	290	302	151	160	159	165	240	255	61	64	NA	NA	171	171	NA	NA	NA	NA	135	135
C14_P2b_34_2	P2b	321	321	119	128	NA	NA	183	183	217	220	159	159	129	134	97	101	214	214	69	69	152	164	236	238	139	142	129	129	302	302	154	163	165	165	255	255	NA	NA	NA	NA	167	167	214	214	145	157	132	135
C14_P2b_8_1	P2b	312	312	131	131	NA	NA	183	183	188	217	159	159	126	132	97	97	212	223	69	73	152	164	238	240	139	139	129	150	302	302	163	163	NA	NA	255	255	61	64	NA	NA	167	171	NA	NA	NA	NA	135	135
C14_P2b_8_4	P2b	312	321	119	131	NA	NA	183	183	209	220	159	159	126	141	97	97	212	212	69	69	164	164	236	236	139	139	129	150	302	302	151	163	159	165	255	255	61	64	NA	NA	167	171	NA	NA	157	157	NA	NA
C14_P5b_15_4	P5b	305	324	114	131	NA	NA	183	183	220	223	151	163	139	145	83	87	217	220	NA	NA	145	150	NA	NA	138	139	129	139	290	290	160	163	NA	NA	240	255	61	61	NA	NA	167	167	NA	NA	NA	NA	135	138
C14_P5b_32_1	P5b	315	321	116	128	NA	NA	183	183	188	209	151	155	140	145	97	97	214	220	69	69	150	166	239	239	139	142	139	139	302	302	163	163	168	168	240	249	61	64	138	138	181	189	214	219	145	155	135	135
C14_P6b_9_2	P6b	321	324	119	128	NA	NA	183	186	189	220	146	159	129	141	83	97	199	214	69	69	152	152	236	236	124	139	129	136	290	302	148	160	NA	NA	NA	NA	61	61	NA	NA	167	181	214	219	155	155	132	135
C14_P3b_13_3	P3b	308	315	116	122	NA	NA	183	186	220	226	NA	NA	NA	NA	93	93	214	214	69	69	NA	NA	236	238	142	142	NA	NA	302	302	157	157	168	171	249	249	61	61	NA	NA	185	185	NA	NA	NA	NA	NA	NA
C14_P3b_15_1	P3b	315	321	116	116	NA	NA	183	186	217	220	151	155	NA	NA	93	97	214	214	69	78	NA	NA	238	240	142	142	NA	NA	302	302	157	163	165	171	245	249	61	64	NA	NA	167	167	NA	NA	NA	NA	NA	NA
C14_P3b_28_4	P3b	315	315	116	131	NA	NA	183	183	217	217	159	159	140	140	97	97	214	214	69	69	147	156	240	240	142	142	129	129	302	302	157	157	NA	NA	240	249	64	64	NA	NA	173	173	234	234	NA	NA	132	135
C14_P3b_36_4	P3b	315	315	128	128	NA	NA	186	186	223	223	156	159	140	144	95	97	214	214	73	73	152	160	236	238	142	142	129	134	302	302	157	157	165	165	245	245	NA	NA	NA	NA	167	167	219	234	155	155	135	135
C14_P3b_5_3	P3b	308	315	116	122	NA	NA	183	186	NA	NA	151	155	134	140	87	93	214	214	69	69	152	160	236	238	139	142	129	129	302	302	157	157	NA	NA	245	249	61	61	NA	NA	173	173	219	234	155	156	132	135
S14_P9b_16_3	P9b	315	315	128	131	NA	NA	183	186	220	220	155	159	141	141	NA	NA	170	214	78	78	150	152	237	237	142	142	129	136	290	290	163	163	165	165	251	251	NA	NA	NA	NA	189	192	214	219	NA	NA	128	132
S14_P9b_16_4	P9b	312	312	131	131	NA	NA	171	171	220	220	163	163	137	137	97	97	211	211	69	69	147	147	236	239	139	139	NA	NA	302	302	160	160	165	165	249	249	61	61	NA	NA	174	174	NA	NA	NA	NA	125	125
S14_P9b_18_4	P9b	315	318	128	128	NA	NA	183	186	NA	NA	155	155	129	145	83	83	209	215	69	73	150	150	236	236	139	142	129	129	302	302	163	163	165	165	240	249	61	64	NA	NA	171	171	214	222	158	158	135	135
S14_P9b_19_1	P9b	308	318	128	131	NA	NA	183	186	220	223	155	164	140	140	82	82	170	213	69	69	166	172	239	239	142	142	129	129	290	302	157	163	165	174	249	251	NA	NA	NA	NA	171	210	219	222	145	156	135	142
S14_M7b_11_3	M7b	324	324	128	128	NA	NA	183	186	217	217	146	167	134	134	NA	NA	217	217	69	69	152	156	238	238	139	152	129	129	302	302	166	166	165	165	243	245	64	64	NA	NA	189	189	NA	NA	155	155	132	132
S14_M7b_3_3	M7b	315	321	128	131	NA	NA	183	186	217	217	151	155	137	137	95	95	213	223	69	69	152	182	NA	NA	136	142	129	129	302	302	171	171	NA	NA	243	255	61	61	140	142	174	192	NA	NA	155	155	132	138
S14_M7b_5_1	M7b	298	315	128	131	NA	NA	NA	NA	217	217	146	146	131	140	95	97	196	196	69	69	152	152	238	240	138	142	129	129	302	302	163	166	NA	NA	NA	NA	64	64	NA	NA	185	185	219	219	155	158	NA	NA
S14_M7b_6_3	M7b	321	324	131	131	NA	NA	174	186	212	217	151	171	NA	NA	NA	NA	196	196	69	69	147	182	NA	NA	121	136	129	129	302	302	163	171	159	159	243	243	61	61	137	139	173	185	NA	NA	NA	NA	135	138
S14_P1a_13_3	P1a	312	321	128	128	NA	NA	183	183	NA	NA	155	159	129	129	87	87	214	214	69	78	152	152	240	240	139	139	129	129	302	302	163	163	NA	NA	NA	NA	61	61	136	136	189	189	219	219	156	156	122	128
S14_P1a_34_3	P1a	308	315	131	131	NA	NA	183	186	220	223	155	159	154	154	87	87	214	217	69	73	152	152	NA	NA	136	149	NA	NA	290	302	157	163	NA	NA	255	255	NA	NA	NA	NA	167	189	NA	NA	NA	NA	122	128
S14_P1a_5_3	P1a	312	321	131	131	NA	NA	183	183	220	220	155	159	129	129	87	87	214	214	69	79	152	152	237	240	136	136	129	150	302	302	157	157	174	174	255	255	61	64	NA	NA	189	189	NA	NA	157	157	122	135
S14_P9a_11_1	P9a	315	321	128	131	NA	NA	180	186	220	220	147	159	136	146	83	87	209	215	73	73	150	159	236	238	139	142	NA	NA	290	302	157	163	165	165	240	240	61	64	137	139	192	192	NA	NA	NA	NA	NA	NA
S14_P9a_29_3	P9a	324	324	131	131	NA	NA	186	186	197	197	155	163	136	136	87	97	220	220	73	73	150	150	236	236	142	142	129	129	302	302	163	163	165	174	NA	NA	61	64	NA	NA	192	192	214	214	NA	NA	122	122
S14_P9a_4_3	P9a	315	321	128	131	NA	NA	177	180	217	220	NA	NA	140	145	87	87	153	220	73	73	150	159	237	237	121	139	NA	NA	290	302	157	163	165	165	240	249	64	64	NA	NA	171	192	214	222	NA	NA	122	135
S14_M6a_12_1	M6a	321	321	111	119	NA	NA	183	183	209	220	146	146	134	137	87	93	217	217	69	69	145	164	235	235	139	146	NA	NA	302	302	163	163	168	168	249	255	61	69	138	139	189	192	226	226	155	155	132	132
S14_M6a_14_3	M6a	315	321	111	128	NA	NA	177	183	197	226	166	170	129	134	87	95	196	213	69	69	152	152	237	237	NA	NA	129	139	302	302	163	163	165	165	249	255	64	64	NA	NA	167	189	NA	NA	155	155	132	132
S14_M6a_6_4	M6a	321	321	111	111	NA	NA	171	183	220	220	146	155	134	134	NA	NA	196	196	69	69	150	150	NA	NA	142	146	129	129	302	302	163	163	168	168	255	255	NA	NA	NA	NA	194	194	214	219	NA	NA	132	132
S14_M6a_8_3	M6a	321	321	128	128	NA	NA	171	177	220	220	146	146	129	134	NA	NA	196	196	69	69	152	168	236	238	146	146	NA	NA	302	302	160	163	NA	NA	NA	NA	64	69	138	140	167	167	214	219	155	155	132	135
S14_P10a_22_3	P10a	315	315	131	131	NA	NA	180	183	NA	NA	159	159	129	134	NA	NA	NA	NA	73	73	145	145	NA	NA	121	139	129	136	302	302	160	163	165	165	NA	NA	61	69	137	140	171	171	222	231	NA	NA	132	132
S14_P10a_43_1	P10a	312	315	114	128	NA	NA	180	183	217	223	159	159	129	144	NA	NA	214	214	73	73	145	152	236	238	121	139	NA	NA	302	302	160	163	171	177	249	255	NA	NA	NA	NA	171	198	214	214	145	145	NA	NA
S14_P10a_43_3	P10a	312	315	128	131	NA	NA	177	180	217	220	159	163	129	146	87	87	214	214	69	73	145	147	NA	NA	121	139	NA	NA	302	302	160	160	162	162	255	255	NA	NA	NA	NA	198	198	214	219	145	155	132	132
S14_M8a_1_3	M8a	321	321	116	116	NA	NA	174	186	NA	NA	146	155	NA	NA	87	95	213	213	69	69	152	168	238	238	121	145	NA	NA	302	302	160	171	168	168	NA	NA	NA	NA	NA	NA	194	194	214	214	150	155	135	135
S14_M8a_38_1	M8a	308	315	122	131	NA	NA	186	186	197	217	146	157	144	144	80	95	213	223	69	69	152	168	236	238	130	139	129	129	290	302	160	160	165	174	243	249	64	64	NA	NA	185	185	214	219	150	155	132	132
S14_M8a_8_3	M8a	315	321	131	131	NA	NA	183	183	217	217	146	167	134	134	NA	NA	213	213	69	69	154	154	237	243	142	142	129	139	302	302	163	163	159	165	NA	NA	64	64	NA	NA	194	194	NA	NA	NA	NA	132	132
S14_P2b_12_3	P2b	321	321	131	131	NA	NA	183	183	209	209	159	159	129	129	97	101	156	156	69	69	147	147	236	236	138	138	129	129	302	302	163	163	165	165	246	255	64	64	NA	NA	189	189	214	214	NA	NA	132	135
S14_P2b_21_3	P2b	321	321	131	131	NA	NA	NA	NA	NA	NA	156	159	129	132	NA	NA	209	209	NA	NA	145	145	NA	NA	139	139	129	129	290	290	163	171	165	165	246	249	61	64	NA	NA	171	189	NA	NA	NA	NA	135	135
S14_P5b_26_3	P5b	308	308	114	125	NA	NA	183	183	220	220	146	155	129	137	87	88	213	213	78	78	152	160	236	238	139	139	139	145	290	290	160	163	165	165	249	255	NA	NA	NA	NA	167	171	214	217	NA	NA	122	132
S14_P6b_31_3	P6b	315	321	125	125	NA	NA	183	186	220	223	159	159	140	145	97	97	165	214	69	78	152	172	NA	NA	127	139	129	139	290	302	163	163	NA	NA	240	255	64	69	NA	NA	NA	NA	214	219	145	155	132	135
S14_P3b_11_3	P3b	315	315	114	116	NA	NA	183	186	NA	NA	155	167	134	146	NA	NA	214	219	69	69	147	152	236	238	142	142	NA	NA	302	302	157	157	NA	NA	237	245	61	61	NA	NA	NA	NA	NA	NA	155	157	132	132
S14_P3b_13_4	P3b	315	315	116	122	NA	NA	183	183	217	217	151	155	134	136	91	93	214	214	69	69	152	152	236	238	139	142	134	134	302	302	157	169	165	165	NA	NA	61	61	NA	NA	167	173	NA	NA	NA	NA	132	132
S14_P3b_16_1	P3b	321	324	116	131	NA	NA	183	186	NA	NA	155	159	134	134	NA	NA	NA	NA	69	69	152	156	240	240	142	142	NA	NA	302	302	157	169	165	171	240	243	61	61	NA	NA	167	173	214	219	150	150	132	138
S14_P3b_16_3	P3b	315	324	116	131	NA	NA	186	186	NA	NA	155	155	134	140	93	93	215	219	69	69	156	156	239	239	139	142	129	129	302	302	157	157	159	168	249	249	61	61	NA	NA	192	192	NA	NA	NA	NA	135	138
S14_P3b_17_3	P3b	308	321	116	131	NA	NA	186	186	217	217	155	159	137	141	NA	NA	179	214	69	78	152	152	236	238	142	142	129	134	302	302	157	157	171	171	240	245	61	64	140	140	167	173	214	219	145	155	NA	NA
C14_P9b_12_2	P9b	315	315	128	128	NA	NA	183	186	209	220	159	167	141	141	82	82	134	217	69	69	152	166	237	239	142	142	NA	NA	290	302	157	157	159	162	243	246	NA	NA	NA	NA	171	192	214	214	155	155	132	135
C14_P9b_14_3	P9b	315	318	116	128	NA	NA	183	186	217	220	155	167	146	146	82	82	214	214	69	78	152	152	NA	NA	139	142	129	129	290	302	163	171	159	165	245	249	NA	NA	NA	NA	173	210	208	214	NA	NA	132	132
C14_P9b_16_3	P9b	315	321	131	131	NA	NA	186	186	220	220	155	170	137	146	NA	NA	170	213	69	69	152	152	NA	NA	142	142	129	129	290	302	160	163	165	165	251	251	61	64	NA	NA	171	173	NA	NA	150	155	NA	NA
C14_P9b_18_3	P9b	315	315	131	131	NA	NA	186	186	220	220	155	155	141	141	97	97	196	196	69	69	159	172	237	237	142	142	129	150	290	290	157	163	162	165	245	251	61	61	NA	NA	171	171	NA	NA	155	158	132	132
C14_M7b_19_3	M7b	315	315	122	128	NA	NA	183	183	217	217	151	167	131	141	NA	NA	213	223	69	69	147	170	238	238	142	142	129	129	302	302	163	166	165	165	243	251	61	61	NA	NA	174	174	214	219	155	158	122	135
C14_M7b_28_2	M7b	324	324	128	131	NA	NA	171	186	217	217	146	151	136	136	87	87	213	213	69	69	147	152	238	238	136	146	129	129	290	302	163	163	165	168	246	249	64	64	NA	NA	NA	NA	217	219	155	157	138	138
C14_M7b_3_2	M7b	315	321	128	131	NA	NA	183	183	217	217	146	151	131	146	86	93	NA	NA	69	69	152	182	238	238	136	146	129	129	290	290	171	171	165	171	243	255	61	61	NA	NA	185	189	NA	NA	155	155	132	135
C14_M7b_6_3	M7b	321	324	131	131	NA	NA	183	186	212	217	155	171	136	136	NA	NA	196	223	69	69	182	182	NA	NA	121	136	129	129	302	302	163	171	168	168	243	243	61	61	NA	NA	185	185	214	214	157	158	135	135
C14_P1a_33_2	P1a	321	321	131	131	NA	NA	183	183	220	220	155	159	129	141	87	87	214	214	73	73	152	152	240	240	136	136	129	129	302	302	163	163	174	174	255	255	NA	NA	NA	NA	189	189	NA	NA	155	157	128	128
C14_P1a_34_3	P1a	321	321	128	131	NA	NA	183	186	220	220	155	155	NA	NA	NA	NA	214	214	NA	NA	152	152	240	240	136	136	129	150	290	302	157	163	174	174	255	255	61	61	NA	NA	189	189	NA	NA	NA	NA	122	132
C14_P1a_35_1	P1a	321	321	131	131	NA	NA	183	183	220	220	159	159	143	143	87	87	214	214	69	73	152	152	240	240	136	136	129	129	302	302	157	163	NA	NA	255	255	NA	NA	NA	NA	189	189	219	228	158	158	122	132
C14_P1a_5_1	P1a	312	321	131	131	NA	NA	183	186	220	220	155	159	NA	NA	87	87	150	214	69	79	152	152	240	240	136	136	129	129	302	302	157	163	174	177	252	255	61	73	NA	NA	189	189	219	219	NA	NA	122	142
C14_P9a_10_3	P9a	315	315	128	131	NA	NA	180	186	215	217	155	163	141	141	NA	NA	159	159	69	69	150	159	NA	NA	121	139	129	129	302	302	160	163	165	165	249	249	64	64	NA	NA	189	189	208	222	145	145	122	135
C14_P9a_20_3	P9a	308	315	128	131	NA	NA	180	186	215	220	155	167	140	154	87	87	209	215	73	73	159	159	236	236	121	121	129	129	302	302	157	163	165	165	249	252	61	61	NA	NA	NA	NA	219	226	145	158	128	135
C14_P9a_29_2	P9a	315	324	128	131	NA	NA	186	186	197	217	155	163	NA	NA	83	97	220	220	69	73	150	150	236	238	142	142	129	129	302	302	163	163	174	174	240	240	61	64	NA	NA	167	192	214	214	145	158	122	122
C14_M6a_10_1	M6a	321	321	128	128	NA	NA	171	186	220	220	146	159	129	134	95	97	196	196	69	69	145	179	235	238	142	142	129	139	302	302	163	163	168	168	245	255	61	64	NA	NA	189	194	NA	NA	NA	NA	132	135
C14_M6a_11_1	M6a	321	321	119	119	NA	NA	171	171	197	220	146	146	NA	NA	87	87	217	217	69	69	145	168	235	235	142	146	129	129	290	302	163	163	165	165	255	265	61	80	NA	NA	189	194	NA	NA	155	155	132	135
C14_M6a_12_2	M6a	315	321	111	122	NA	NA	171	183	220	220	146	146	134	136	93	93	195	195	69	69	145	150	232	242	142	142	129	139	290	302	160	163	168	168	245	255	64	64	NA	NA	192	192	214	219	155	158	132	132
C14_M6a_3_3	M6a	321	321	119	119	NA	NA	171	183	220	220	146	146	129	137	87	97	196	196	69	69	152	152	238	240	121	121	129	139	302	302	163	163	NA	NA	249	249	64	64	NA	NA	167	194	NA	NA	150	155	132	135
C14_M6a_5_1	M6a	321	321	111	128	NA	NA	177	177	209	220	146	146	129	136	87	87	196	217	69	69	156	164	235	235	139	142	129	129	290	302	160	163	NA	NA	249	265	61	64	NA	NA	189	194	219	226	155	158	132	132
C14_M6a_5_3	M6a	321	321	111	119	NA	NA	177	183	209	220	146	146	129	134	87	93	195	217	69	69	156	164	235	235	139	142	129	129	290	302	160	163	NA	NA	245	249	61	64	NA	NA	189	194	NA	NA	155	158	132	132
C14_P10a_14_1	P10a	312	324	128	131	NA	NA	180	183	223	223	146	159	129	129	87	97	214	214	69	69	147	152	236	236	121	121	129	129	290	302	160	160	177	177	243	243	61	61	NA	NA	171	198	231	231	NA	NA	132	138
C14_P10a_14_3	P10a	315	324	128	131	NA	NA	180	180	223	223	159	159	129	140	NA	NA	214	214	69	69	145	147	236	236	136	136	129	129	290	302	160	160	162	177	243	255	61	61	NA	NA	171	189	219	231	150	155	132	135
C14_P10a_2_3	P10a	312	315	128	128	NA	NA	177	180	223	223	146	155	137	137	87	87	214	214	69	69	147	147	236	236	121	136	129	129	302	302	163	163	177	177	249	255	61	64	NA	NA	171	171	219	231	145	145	132	132
C14_P10a_37_2	P10a	312	315	128	128	NA	NA	177	180	217	223	159	170	129	129	87	87	214	214	73	73	147	147	236	236	121	142	129	129	302	302	160	160	162	162	249	249	61	61	NA	NA	174	174	NA	NA	NA	NA	135	142
C14_P10a_39_1	P10a	315	315	114	131	NA	NA	177	180	220	223	155	171	129	129	87	97	214	214	69	73	147	147	236	236	121	136	129	129	302	302	163	166	162	162	243	249	61	61	NA	NA	171	198	222	222	145	145	122	122
C14_M8a_1_1	M8a	315	321	116	128	NA	NA	183	186	217	217	146	155	137	140	95	95	223	223	73	78	154	154	NA	NA	121	142	129	129	302	302	160	171	168	168	243	249	61	61	NA	NA	194	194	214	231	NA	NA	135	135
C14_M8a_30_1	M8a	315	315	116	128	NA	NA	171	180	217	217	146	146	134	137	NA	NA	153	153	69	69	156	156	232	232	121	142	129	139	302	302	160	160	165	168	249	249	NA	NA	NA	NA	194	194	219	219	NA	NA	132	132
C14_M8a_31_3	M8a	308	315	116	128	NA	NA	183	183	197	220	146	146	134	140	87	97	223	223	69	69	147	152	238	238	139	142	129	129	302	302	160	163	165	168	249	249	61	64	NA	NA	194	194	NA	NA	NA	NA	132	132
C14_M8a_35_2	M8a	315	315	111	128	NA	NA	174	186	197	220	146	146	134	146	87	89	223	223	69	69	147	168	238	238	142	155	129	129	302	302	160	163	165	168	249	249	61	64	NA	NA	194	194	NA	NA	NA	NA	132	132
C14_M8a_38_3	M8a	308	315	128	131	NA	NA	183	186	197	197	146	146	137	144	80	97	213	223	73	73	152	154	234	238	139	155	129	129	302	302	160	160	168	174	243	249	61	64	NA	NA	185	194	214	219	150	155	132	132
C14_M8a_8_3	M8a	308	324	116	131	NA	NA	183	186	217	220	146	167	134	134	95	101	213	213	69	69	150	154	233	237	138	142	129	129	302	302	163	163	159	168	249	249	NA	NA	NA	NA	194	194	214	231	155	157	132	138
C14_P2b_21_2	P2b	312	321	131	131	NA	NA	183	183	217	217	159	159	NA	NA	97	97	212	214	69	73	164	164	238	238	139	142	129	150	302	302	163	163	159	168	255	255	61	64	NA	NA	171	171	214	214	155	157	132	135
C14_P2b_21_3	P2b	312	312	131	131	NA	NA	183	183	209	220	159	159	132	141	97	97	223	223	69	69	147	152	236	236	139	139	129	129	302	302	163	163	NA	NA	246	255	NA	NA	NA	NA	167	171	NA	NA	NA	NA	132	132
C14_P2b_23_1	P2b	324	324	131	131	NA	NA	183	183	220	220	156	156	139	139	97	97	209	234	69	69	145	147	238	238	139	139	129	129	290	302	160	163	165	165	255	255	61	61	NA	NA	167	171	NA	NA	NA	NA	128	132
C14_P2b_23_3	P2b	315	321	131	131	NA	NA	183	183	220	220	155	159	132	139	97	97	156	212	69	69	150	152	NA	NA	139	139	129	129	290	290	148	163	159	165	252	255	61	64	NA	NA	167	171	NA	NA	155	155	135	135
C14_P2b_31_3	P2b	312	321	114	114	NA	NA	183	183	209	220	159	159	126	141	97	101	156	209	69	69	145	164	236	236	142	142	129	150	302	302	163	163	165	165	255	255	NA	NA	NA	NA	171	192	214	214	NA	NA	135	135
C14_P5b_8_1	P5b	315	321	114	131	NA	NA	183	186	217	217	146	155	NA	NA	83	87	218	218	69	69	147	156	236	236	139	146	NA	NA	290	302	163	163	165	168	234	240	61	64	NA	NA	167	167	NA	NA	157	158	NA	NA
C14_P6b_21_2	P6b	321	321	128	128	NA	NA	183	183	212	217	159	163	NA	NA	83	97	214	214	NA	NA	145	166	237	240	133	142	136	136	302	302	160	163	NA	NA	240	249	NA	NA	NA	NA	181	181	211	214	145	145	132	132
C14_P6b_21_3	P6b	321	321	128	128	NA	NA	174	183	189	220	159	159	NA	NA	NA	NA	185	213	NA	NA	166	166	NA	NA	133	142	129	139	302	302	163	163	159	165	240	243	69	69	NA	NA	181	189	214	214	145	155	NA	NA
C14_P3b_17_1	P3b	321	321	116	131	NA	NA	186	186	220	223	159	167	NA	NA	83	91	179	214	78	78	147	160	NA	NA	142	142	129	129	302	302	157	163	171	171	245	249	61	61	NA	NA	185	185	214	234	145	155	135	135
C14_P3b_27_3	P3b	315	315	116	128	NA	NA	183	183	217	220	155	167	134	140	83	91	214	219	69	69	152	160	240	240	130	142	129	129	302	302	157	169	171	171	245	249	NA	NA	NA	NA	167	173	214	214	155	155	132	132
C14_P3b_28_3	P3b	315	324	131	131	NA	NA	183	183	217	217	159	159	NA	NA	91	97	156	156	69	69	147	147	238	240	139	142	129	129	302	302	157	157	168	171	NA	NA	64	64	NA	NA	173	173	234	234	150	155	132	135
C14_P3b_5_1	P3b	315	321	122	131	NA	NA	183	183	217	223	155	155	134	140	87	97	214	214	69	69	152	160	240	240	136	142	129	134	302	302	157	163	165	171	249	249	61	64	NA	NA	192	192	NA	NA	155	155	132	135
S14_P9b_19_3	P9b	308	321	116	131	NA	NA	186	186	220	223	159	167	NA	NA	80	82	170	214	69	69	152	172	NA	NA	142	142	129	129	302	302	157	163	159	165	243	246	61	61	NA	NA	171	173	214	222	145	150	132	142
S14_M7b_12_3	M7b	315	315	128	131	NA	NA	171	177	217	217	146	155	131	131	86	86	NA	NA	69	69	152	182	NA	NA	136	142	129	145	302	302	163	171	165	165	243	243	61	61	NA	NA	185	189	214	214	158	158	NA	NA
S14_M7b_12_4	M7b	315	324	116	128	NA	NA	171	186	217	217	151	155	131	137	NA	NA	196	223	69	69	152	152	238	238	121	142	139	145	302	302	163	166	165	165	243	243	NA	NA	NA	NA	185	185	217	219	NA	NA	132	135
S14_M7b_2_4	M7b	321	321	116	116	NA	NA	171	186	217	217	146	167	NA	NA	86	95	211	223	69	69	182	182	238	238	139	146	129	129	302	302	163	171	165	168	243	249	NA	NA	NA	NA	NA	NA	214	219	NA	NA	NA	NA
S14_P1a_35_3	P1a	312	312	131	131	NA	NA	183	186	220	220	159	159	129	143	87	87	214	214	69	73	152	152	240	240	136	136	129	129	302	302	157	163	165	174	255	255	61	61	NA	NA	189	189	NA	NA	NA	NA	122	122
S14_P1a_5_4	P1a	315	321	131	131	NA	NA	183	186	220	220	155	159	129	129	87	87	214	214	NA	NA	152	152	240	240	136	136	129	129	302	302	157	157	174	174	255	255	61	64	NA	NA	189	189	214	219	NA	NA	122	122
S14_P9a_29_2	P9a	321	324	131	131	NA	NA	180	186	197	217	146	163	136	140	87	97	220	220	73	73	150	150	NA	NA	139	142	129	129	290	302	163	163	165	174	240	249	61	61	NA	NA	188	192	214	214	155	158	NA	NA
S14_P9a_38_4	P9a	315	315	128	128	NA	NA	183	186	188	217	147	163	136	136	NA	NA	153	209	73	73	137	150	238	238	121	139	129	129	290	290	157	163	165	165	240	249	NA	NA	NA	NA	167	192	214	214	155	158	122	142
S14_P9a_43_4	P9a	308	315	128	128	NA	NA	183	183	217	217	159	163	138	140	83	87	218	220	73	73	160	160	238	238	136	142	129	129	302	302	157	163	171	174	240	249	61	61	NA	NA	189	189	NA	NA	NA	NA	132	132
S14_M6a_10_2	M6a	315	321	122	125	NA	NA	171	171	220	220	NA	NA	129	137	87	97	196	196	69	69	150	152	232	235	121	146	129	129	302	302	163	163	168	168	255	255	61	64	NA	NA	194	194	219	226	155	155	132	135
S14_M6a_5_4	M6a	321	321	111	128	NA	NA	177	183	209	220	146	146	136	136	93	93	195	217	69	69	150	164	235	235	139	142	129	139	290	302	160	163	168	168	245	249	61	64	NA	NA	189	189	217	226	157	158	132	132
S14_M6a_7_2	M6a	321	321	111	128	NA	NA	183	186	197	220	146	146	129	137	93	95	196	211	69	69	NA	NA	235	238	146	146	129	139	302	302	163	163	165	165	249	255	64	64	NA	NA	189	194	219	219	NA	NA	132	135
S14_M6a_8_4	M6a	321	321	128	128	NA	NA	174	174	220	220	146	146	129	134	NA	NA	196	196	69	69	152	152	235	235	133	133	139	139	302	302	163	163	165	168	245	245	64	64	NA	NA	194	194	219	219	155	157	132	132
S14_M6a_9_3	M6a	315	315	128	128	NA	NA	183	183	226	226	166	166	134	134	87	87	196	196	69	69	145	152	235	238	142	142	NA	NA	302	302	NA	NA	165	168	243	255	61	64	NA	NA	189	189	214	214	150	155	132	132
S14_M6a_9_4	M6a	315	321	111	128	NA	NA	171	186	220	226	146	163	129	129	NA	NA	196	213	69	69	152	152	NA	NA	142	142	129	139	290	302	163	163	165	165	243	255	64	64	NA	NA	189	194	214	219	150	158	132	135
S14_P10a_14_4	P10a	315	321	131	131	NA	NA	183	183	223	223	146	159	140	140	87	97	214	214	69	73	147	147	238	238	136	142	129	129	302	302	163	163	171	177	249	255	61	64	NA	NA	171	171	NA	NA	145	145	142	142
S14_P10a_25_3	P10a	315	321	128	128	NA	NA	177	180	NA	NA	155	159	144	144	NA	NA	214	214	73	73	152	152	NA	NA	136	139	129	129	302	302	NA	NA	162	162	255	255	61	61	NA	NA	171	171	208	208	NA	NA	132	135
S14_P10a_39_4	P10a	315	315	114	128	NA	NA	180	180	NA	NA	155	159	137	144	87	97	214	214	73	73	147	152	236	236	121	139	129	129	302	302	160	166	NA	NA	243	252	NA	NA	NA	NA	171	171	208	208	145	145	135	135
S14_P10a_43_4	P10a	312	321	128	128	NA	NA	180	180	217	223	166	170	129	146	87	87	214	214	73	73	147	147	236	238	121	136	129	129	302	302	160	160	171	171	255	255	61	64	NA	NA	192	198	214	222	145	155	132	132
S14_M8a_11_3	M8a	315	321	111	111	NA	NA	177	183	217	220	157	167	134	140	87	95	213	223	69	69	150	154	243	243	138	142	NA	NA	302	302	163	171	165	168	243	249	64	64	NA	NA	194	194	NA	NA	NA	NA	132	138
S14_M8a_11_4	M8a	315	315	128	131	NA	NA	183	186	217	220	146	155	137	137	93	97	213	218	69	69	152	152	237	243	133	142	129	129	302	302	163	163	NA	NA	249	251	61	61	NA	NA	194	194	214	214	145	155	NA	NA
S14_M8a_31_2	M8a	315	315	128	128	NA	NA	183	186	197	217	146	146	134	146	87	95	213	223	69	69	145	147	238	238	142	155	129	129	290	302	160	160	165	165	249	249	61	61	NA	NA	170	194	NA	NA	150	150	132	138
S14_M8a_31_4	M8a	315	315	128	128	NA	NA	183	186	197	217	NA	NA	134	134	87	95	223	223	69	69	NA	NA	234	238	130	142	129	139	302	302	160	171	165	168	249	249	61	61	NA	NA	185	194	NA	NA	150	150	132	132
S14_M8a_38_4	M8a	315	315	128	131	NA	NA	186	186	197	197	146	146	144	144	NA	NA	213	213	69	69	152	152	238	238	139	139	129	129	302	302	160	160	174	174	243	243	61	64	NA	NA	185	185	214	214	155	157	132	132
S14_P2b_21_4	P2b	321	324	131	131	NA	NA	183	183	209	209	159	163	132	140	97	101	209	209	66	73	145	147	237	240	138	138	129	129	290	290	163	171	165	165	243	246	61	64	NA	NA	189	189	214	214	155	155	128	135
S14_P2b_3_4	P2b	315	321	114	114	NA	NA	183	183	209	220	159	159	132	141	97	97	214	214	69	69	145	147	236	236	139	142	129	129	302	302	160	163	159	165	255	255	61	64	NA	NA	171	189	NA	NA	NA	NA	128	135
S14_P2b_8_2	P2b	312	312	114	131	NA	NA	183	183	217	220	159	159	126	126	97	97	NA	NA	73	73	164	164	NA	NA	139	139	129	150	302	302	163	163	168	171	246	255	61	64	NA	NA	171	171	214	214	145	157	132	135
S14_P5b_26_4	P5b	315	321	114	119	NA	NA	NA	NA	217	217	156	159	132	132	97	97	211	214	73	73	145	147	236	238	139	142	129	129	290	302	163	171	NA	NA	249	255	64	64	NA	NA	167	189	214	214	145	155	135	135
S14_P6b_21_3	P6b	321	321	128	131	NA	NA	183	183	212	223	155	159	141	146	93	97	185	211	73	78	147	172	241	241	133	139	136	139	302	302	157	160	165	165	234	255	61	69	NA	NA	167	171	NA	NA	145	145	132	132
S14_P3b_16_2	P3b	324	324	128	131	NA	NA	183	186	217	217	155	167	134	144	87	87	215	219	69	69	156	160	240	240	139	142	129	129	302	302	157	160	171	171	243	249	NA	NA	NA	NA	192	192	NA	NA	NA	NA	132	135
S14_P3b_16_4	P3b	315	324	116	131	NA	NA	183	183	188	217	155	155	134	140	93	93	215	215	69	69	152	152	NA	NA	139	142	129	129	302	302	157	157	159	171	243	249	61	61	NA	NA	173	192	226	226	150	150	135	138
S14_P3b_28_2	P3b	324	324	116	116	NA	NA	183	183	217	217	159	159	140	140	91	97	156	214	78	78	147	147	240	240	139	142	129	129	302	302	157	157	NA	NA	240	249	64	64	NA	NA	173	173	NA	NA	150	150	132	135
C14_P9b_12_4	P9b	315	315	128	131	121	121	186	186	217	223	155	155	NA	NA	NA	NA	217	217	69	69	152	166	235	238	146	146	129	129	290	302	157	171	165	174	246	251	64	64	140	140	210	212	214	219	NA	NA	NA	NA
C14_P9b_24_1	P9b	315	315	116	128	121	121	183	186	217	217	155	159	NA	NA	97	101	134	134	69	69	152	172	235	238	121	142	129	129	290	302	157	160	165	174	245	255	61	61	138	138	210	212	NA	NA	155	155	132	132
C14_P9b_24_2	P9b	315	315	116	131	121	125	183	183	217	220	159	159	134	134	NA	NA	NA	NA	69	69	152	159	236	238	142	142	129	129	302	302	157	163	165	174	243	251	61	61	138	142	192	212	NA	NA	150	155	132	132
C14_M7b_5_2	M7b	315	315	122	128	121	125	174	186	217	217	146	151	NA	NA	NA	NA	219	219	69	69	152	152	238	238	136	138	129	129	302	302	160	163	165	171	243	243	61	64	NA	NA	173	185	214	222	NA	NA	135	135
C14_M7b_7_4	M7b	315	315	128	128	125	125	186	186	217	217	167	167	131	144	NA	NA	211	211	69	69	182	182	231	238	136	138	129	145	302	302	163	171	165	168	255	255	61	64	138	140	185	185	217	219	155	155	132	135
C14_P1a_34_2	P1a	308	312	131	131	121	121	183	183	220	220	159	159	129	129	NA	NA	214	214	73	78	152	152	NA	NA	136	136	129	129	302	302	157	163	159	174	246	255	61	61	137	137	167	189	219	219	156	156	128	142
C14_P1a_9_3	P1a	321	321	131	131	121	129	183	183	220	220	155	159	129	129	NA	NA	214	217	NA	NA	152	152	NA	NA	136	136	NA	NA	302	302	163	163	159	159	255	255	NA	NA	NA	NA	189	189	NA	NA	NA	NA	122	135
C14_P9a_10_4	P9a	315	315	128	128	121	129	183	186	215	220	155	163	136	136	NA	NA	159	215	69	69	150	150	NA	NA	121	139	129	129	NA	NA	157	160	165	171	249	249	64	64	141	141	188	189	NA	NA	145	158	122	132
C14_P9a_20_2	P9a	315	318	128	131	120	128	183	186	220	220	155	155	136	140	NA	NA	153	215	73	73	147	160	236	238	121	142	NA	NA	290	302	163	163	165	165	240	249	NA	NA	NA	NA	188	188	NA	NA	145	155	NA	NA
C14_P9a_4_4	P9a	321	321	128	128	129	129	177	180	197	217	155	155	140	145	NA	NA	153	215	69	69	150	159	236	238	139	139	129	129	290	290	163	163	165	171	240	249	NA	NA	140	140	NA	NA	NA	NA	NA	NA	135	135
C14_P9a_6_2	P9a	321	321	122	128	121	129	180	183	220	226	155	155	136	141	NA	NA	153	209	73	73	NA	NA	NA	NA	142	142	129	129	302	302	148	157	171	174	249	261	64	64	137	137	189	192	208	214	NA	NA	NA	NA
C14_P9a_6_3	P9a	318	318	122	131	121	129	183	183	215	226	155	155	NA	NA	NA	NA	209	218	69	69	150	150	237	239	121	142	129	129	290	302	163	163	165	165	249	249	61	64	NA	NA	192	192	203	214	NA	NA	135	142
C14_M6a_6_2	M6a	321	321	111	119	125	125	171	183	197	220	155	159	129	134	NA	NA	173	196	69	69	150	152	237	237	142	146	NA	NA	290	302	163	163	168	168	249	255	64	64	140	142	194	194	NA	NA	155	155	132	135
C14_P10a_14_4	P10a	315	315	128	131	121	121	180	183	223	223	159	170	129	137	NA	NA	214	214	69	69	145	147	236	236	136	139	129	129	302	302	160	163	174	177	249	249	61	61	137	140	171	198	NA	NA	145	150	NA	NA
C14_P10a_2_2	P10a	321	321	128	128	121	121	177	183	223	223	159	170	137	137	NA	NA	213	213	73	73	147	147	236	236	121	136	129	129	302	302	163	163	174	177	243	249	61	61	137	137	171	189	214	231	145	155	NA	NA
C14_P10a_39_2	P10a	315	315	128	131	121	121	177	180	223	223	166	171	NA	NA	NA	NA	214	214	69	69	147	147	NA	NA	136	139	129	129	302	302	163	163	162	171	240	243	61	61	NA	NA	171	198	NA	NA	NA	NA	NA	NA
C14_P10a_9_1	P10a	321	321	131	131	129	129	183	186	188	188	156	159	NA	NA	97	101	209	234	69	73	152	152	236	236	139	139	129	129	290	302	163	163	NA	NA	243	246	64	64	144	144	167	167	214	219	145	157	132	135
C14_M8a_13_4	M8a	315	315	128	128	125	125	180	180	197	197	146	146	NA	NA	NA	NA	141	141	69	69	145	156	238	238	139	155	129	129	302	302	171	171	165	168	249	251	61	64	138	138	185	185	214	214	NA	NA	132	132
C14_M8a_31_1	M8a	315	315	128	128	125	125	183	183	197	197	146	146	NA	NA	NA	NA	223	223	69	69	156	156	NA	NA	139	142	129	129	302	302	160	160	165	165	249	249	NA	NA	138	138	194	194	NA	NA	150	150	NA	NA
C14_M8a_35_4	M8a	315	315	111	128	121	125	180	180	220	220	146	146	NA	NA	NA	NA	213	213	69	69	168	168	236	238	155	155	NA	NA	302	302	160	160	165	168	249	249	61	64	NA	NA	194	194	219	222	150	150	NA	NA
C14_P2b_10_3	P2b	321	321	131	131	125	125	183	183	220	220	159	159	126	126	80	97	156	214	69	69	164	164	237	240	139	142	NA	NA	302	302	163	163	159	171	240	240	64	64	138	140	167	167	NA	NA	145	155	132	132
C14_P2b_6_2	P2b	312	321	114	114	125	129	183	183	220	220	159	159	NA	NA	NA	NA	211	211	69	69	147	147	NA	NA	139	139	129	129	302	302	163	163	165	165	246	255	61	61	136	140	167	171	NA	NA	145	145	NA	NA
C14_P5b_15_3	P5b	318	321	128	131	121	125	183	186	220	223	146	163	129	139	NA	NA	215	220	69	69	147	152	NA	NA	121	138	NA	NA	290	302	157	160	165	168	240	246	61	61	137	140	167	167	NA	NA	150	155	132	135
C14_P3b_13_2	P3b	315	315	116	122	121	125	183	186	217	226	167	167	134	134	NA	NA	214	214	69	69	NA	NA	236	239	142	142	NA	NA	302	302	157	157	168	168	240	249	NA	NA	137	144	NA	NA	214	214	155	155	132	132
C14_P3b_14_2	P3b	315	324	111	116	125	125	186	186	188	220	155	155	136	146	NA	NA	209	214	69	69	NA	NA	238	238	139	142	NA	NA	302	302	157	157	165	171	245	249	61	61	NA	NA	167	167	NA	NA	155	155	NA	NA
C14_P3b_16_4	P3b	315	321	116	116	127	127	183	186	217	220	155	159	NA	NA	91	93	214	214	73	73	152	152	240	240	142	142	129	129	302	302	157	163	165	165	240	243	61	61	139	144	173	173	214	226	150	155	132	138
C14_P3b_36_2	P3b	315	315	116	116	125	125	183	186	217	223	156	166	NA	NA	NA	NA	156	214	78	78	147	160	236	238	139	142	129	129	302	302	157	163	165	168	245	249	61	61	137	144	167	185	234	234	155	155	135	138
C14_P3b_5_2	P3b	308	315	116	122	125	125	183	186	217	220	155	159	134	136	NA	NA	214	214	69	69	156	156	NA	NA	139	139	129	134	302	302	157	157	165	167	237	249	61	61	142	142	173	173	NA	NA	150	155	132	132
S14_P3b_36_3	P3b	308	315	116	116	125	125	186	186	217	220	NA	NA	136	144	NA	NA	214	214	69	73	147	152	240	240	NA	NA	NA	NA	290	302	163	166	165	165	245	249	61	61	142	142	167	208	NA	NA	NA	NA	132	138
S14_P9b_12_3	P9b	315	318	128	128	121	125	186	186	217	220	155	159	140	140	78	78	217	217	78	78	147	166	238	238	142	146	NA	NA	290	302	160	163	162	165	243	245	64	64	137	137	171	192	214	222	NA	NA	132	135
S14_P9b_13_1	P9b	315	318	131	131	121	129	183	186	209	217	155	157	134	146	NA	NA	214	217	78	78	172	172	236	236	142	142	NA	NA	290	290	163	171	168	174	243	255	61	61	138	138	189	210	208	219	150	155	132	135
S14_P9b_14_4	P9b	318	318	116	116	121	121	183	183	217	220	155	159	NA	NA	82	82	NA	NA	69	69	147	152	237	237	139	142	129	129	302	302	163	171	165	168	243	245	61	61	138	142	173	173	NA	NA	155	156	132	135
S14_P9b_18_1	P9b	315	321	128	128	121	129	NA	NA	217	220	155	159	134	141	78	82	173	217	69	69	152	159	NA	NA	142	142	NA	NA	290	302	157	163	162	165	249	251	61	61	137	140	173	192	214	231	NA	NA	132	135
S14_P9b_24_3	P9b	315	315	116	131	125	125	186	186	220	223	159	167	NA	NA	NA	NA	170	196	69	69	152	166	236	238	121	142	NA	NA	302	302	160	163	168	174	249	251	NA	NA	138	138	173	210	214	219	NA	NA	132	135
S14_P9b_28_4	P9b	315	315	131	131	121	121	183	186	220	223	159	159	146	146	80	97	134	213	78	78	152	172	237	237	142	142	129	129	290	302	163	163	165	165	249	255	NA	NA	140	140	171	212	214	219	155	155	132	132
S14_M7b_2_1	M7b	321	324	128	128	125	125	171	186	217	217	146	151	NA	NA	NA	NA	NA	NA	69	69	147	182	232	238	146	146	129	139	302	302	166	171	165	168	243	243	61	61	139	142	165	167	214	219	155	158	128	132
S14_M7b_28_1	M7b	324	324	128	128	121	125	177	183	217	217	146	146	137	146	NA	NA	211	211	69	69	160	160	238	238	142	146	129	129	290	302	163	171	165	168	243	243	61	64	NA	NA	185	185	214	234	150	157	135	138
S14_M7b_28_3	M7b	321	324	128	128	121	125	177	183	217	217	146	151	NA	NA	NA	NA	NA	NA	69	69	152	160	238	238	138	146	NA	NA	290	302	163	163	165	165	243	246	64	64	138	138	192	192	NA	NA	NA	NA	132	135
S14_M7b_7_3	M7b	315	315	125	128	125	125	186	186	217	217	146	151	131	134	NA	NA	213	219	69	69	152	182	232	238	NA	NA	129	129	302	302	163	171	165	165	251	255	61	73	140	140	185	185	NA	NA	NA	NA	132	135
S14_M7b_7_4	M7b	321	321	128	128	125	125	183	186	212	217	167	167	141	144	NA	NA	219	219	69	69	152	182	NA	NA	136	139	129	139	302	302	171	171	165	171	251	251	61	61	142	142	185	210	217	234	155	155	NA	NA
S14_P1a_18_3	P1a	321	321	128	131	NA	NA	183	183	220	220	155	159	NA	NA	NA	NA	214	214	NA	NA	152	152	240	240	139	149	129	150	302	302	163	163	NA	NA	255	255	61	64	NA	NA	189	189	NA	NA	157	158	122	135
S14_P1a_31_1	P1a	308	321	128	131	121	129	183	183	220	220	155	159	143	154	NA	NA	214	214	69	73	152	152	NA	NA	136	136	129	129	302	302	157	157	174	174	255	255	61	64	137	137	189	189	219	219	156	156	122	135
S14_P1a_33_3	P1a	321	321	128	131	NA	NA	183	183	220	220	155	159	NA	NA	87	87	NA	NA	73	73	152	152	240	240	136	136	129	129	302	302	157	157	174	174	249	255	61	61	NA	NA	171	189	NA	NA	156	158	NA	NA
S14_P1a_4_1	P1a	312	321	131	131	121	121	183	186	220	220	159	159	154	154	NA	NA	NA	NA	73	73	152	152	236	238	136	136	NA	NA	302	302	157	163	174	174	255	255	61	64	137	137	167	189	NA	NA	NA	NA	122	122
S14_P1a_7_1	P1a	321	321	128	128	121	121	183	186	220	220	155	159	141	141	NA	NA	214	214	73	79	152	152	240	240	136	136	129	150	302	302	157	157	165	174	255	255	61	64	137	137	189	189	228	228	155	156	128	142
S14_P1a_7_3	P1a	312	312	128	131	129	129	183	186	220	220	159	159	NA	NA	NA	NA	214	214	NA	NA	152	152	NA	NA	136	136	NA	NA	302	302	157	157	159	174	252	255	61	64	137	137	189	189	NA	NA	NA	NA	122	128
S14_P1a_9_1	P1a	321	321	131	131	121	129	183	183	220	220	155	155	129	129	NA	NA	217	217	69	79	152	152	240	240	136	136	NA	NA	302	302	163	163	159	159	255	255	61	64	NA	NA	189	189	NA	NA	NA	NA	135	135
S14_P9a_20_1	P9a	308	315	128	131	121	129	NA	NA	220	223	155	167	140	154	NA	NA	162	215	NA	NA	147	160	237	237	121	121	129	129	290	302	157	163	165	165	240	249	61	64	140	140	171	188	214	219	158	158	122	128
S14_P9a_29_1	P9a	321	321	119	119	125	125	171	171	220	220	146	146	NA	NA	87	87	NA	NA	69	69	152	152	238	238	138	138	129	139	302	302	163	163	165	165	249	251	64	64	140	140	194	194	NA	NA	NA	NA	135	135
S14_P9a_40_3	P9a	315	321	128	128	121	121	NA	NA	217	217	146	155	NA	NA	83	87	215	220	69	73	150	160	238	238	139	142	129	129	302	302	163	163	165	174	240	252	61	64	137	140	192	192	NA	NA	145	155	122	135
S14_P9a_43_3	P9a	308	315	128	128	122	131	NA	NA	217	217	155	159	129	140	NA	NA	218	220	73	73	NA	NA	234	238	136	142	NA	NA	302	302	163	163	165	174	240	240	NA	NA	139	139	171	189	222	222	155	155	135	135
S14_M6a_11_1	M6a	315	321	125	128	125	125	171	183	197	220	146	146	NA	NA	NA	NA	213	213	69	69	145	152	NA	NA	NA	NA	129	139	302	302	163	163	165	165	249	249	64	64	140	142	189	194	217	226	155	155	NA	NA
S14_M6a_12_3	M6a	321	321	111	111	121	125	183	183	209	220	146	146	134	137	87	93	195	195	69	69	150	156	235	242	142	146	129	139	302	302	163	163	159	168	255	265	64	69	140	140	194	194	NA	NA	NA	NA	132	132
S14_P10a_14_3	P10a	315	315	128	131	121	121	177	180	223	223	146	159	140	144	87	97	214	214	69	69	145	147	236	236	136	139	129	129	302	302	160	163	171	177	249	255	61	61	137	139	171	189	NA	NA	150	155	132	135
S14_P10a_22_1	P10a	312	315	128	131	NA	NA	183	183	220	223	146	155	NA	NA	NA	NA	213	213	NA	NA	145	145	236	236	139	139	129	129	290	302	163	163	NA	NA	255	255	61	61	137	137	171	198	214	222	145	150	125	132
S14_P10a_25_1	P10a	315	315	128	128	121	121	177	177	223	223	155	159	NA	NA	NA	NA	NA	NA	69	73	152	152	236	236	136	136	129	129	302	302	160	160	162	162	252	252	61	61	137	137	171	198	NA	NA	145	145	132	135
S14_P10a_25_4	P10a	315	321	114	128	121	121	177	180	220	223	159	171	129	144	NA	NA	214	214	73	73	147	147	236	236	121	139	129	129	302	302	160	163	NA	NA	249	255	61	61	137	137	171	171	208	222	145	145	135	135
S14_P10a_9_1	P10a	305	305	131	131	121	121	177	183	223	223	146	159	141	141	87	97	214	214	69	69	145	147	236	238	136	142	NA	NA	NA	NA	157	160	NA	NA	249	255	61	61	137	142	171	171	NA	NA	NA	NA	125	142
S14_M8a_13_3	M8a	315	315	128	128	121	125	180	180	197	197	146	146	137	137	NA	NA	141	213	69	69	145	156	238	238	139	155	NA	NA	302	302	160	171	165	168	251	251	61	76	138	138	185	185	NA	NA	NA	NA	132	138
S14_M8a_18_1	M8a	321	321	128	128	125	125	183	183	220	220	146	163	134	134	NA	NA	NA	NA	69	69	168	168	237	237	138	142	NA	NA	NA	NA	163	163	165	168	243	249	NA	NA	138	142	167	167	214	214	NA	NA	NA	NA
S14_M8a_38_3	M8a	315	315	128	131	125	125	180	183	197	220	146	167	NA	NA	NA	NA	211	223	69	69	145	152	237	237	139	139	NA	NA	302	302	160	160	168	174	243	249	61	64	138	140	170	185	NA	NA	150	157	132	138
S14_P2b_11_1	P2b	315	321	119	119	121	129	183	183	188	209	156	159	NA	NA	NA	NA	156	209	69	69	147	164	236	236	139	142	129	129	290	290	151	163	159	165	246	255	64	64	NA	NA	167	167	214	214	NA	NA	132	135
S14_P2b_12_1	P2b	321	321	114	131	125	129	183	183	220	220	156	159	129	133	NA	NA	211	223	69	69	147	147	238	238	139	139	129	129	302	302	154	154	165	165	246	255	NA	NA	136	144	167	192	214	214	NA	NA	128	135
S14_P2b_23_1	P2b	318	324	131	131	121	121	183	183	188	220	159	159	129	129	NA	NA	209	212	69	69	145	147	236	236	139	139	129	129	290	302	163	163	165	165	240	255	61	64	136	139	167	189	NA	NA	NA	NA	128	135
S14_P2b_31_4	P2b	312	321	114	131	129	129	183	183	220	220	159	159	126	134	NA	NA	156	223	69	69	147	164	NA	NA	139	142	129	129	302	302	163	163	159	165	246	255	64	64	138	138	171	171	214	214	145	145	NA	NA
S14_P2b_6_3	P2b	305	305	114	131	129	129	183	183	209	220	156	159	NA	NA	NA	NA	223	223	69	69	152	164	236	236	139	139	129	150	302	302	163	163	159	165	255	255	64	64	136	144	167	171	NA	NA	145	155	NA	NA
S14_P2b_6_4	P2b	321	321	119	131	129	129	183	183	220	220	159	159	126	126	NA	NA	211	223	69	69	147	155	236	238	136	139	129	129	302	302	154	163	165	165	246	255	64	64	136	144	167	171	214	214	145	157	132	135
S14_P5b_4_1	P5b	315	321	125	128	121	125	180	186	188	217	163	163	NA	NA	NA	NA	147	147	73	78	145	147	238	238	142	142	136	136	290	302	157	160	165	168	240	255	61	64	NA	NA	167	167	NA	NA	145	155	132	142
S14_P6b_1_3	P6b	315	315	128	128	121	125	183	183	189	220	146	159	141	141	NA	NA	199	199	69	73	NA	NA	235	235	139	142	139	139	302	302	160	160	165	165	240	249	64	64	137	137	185	185	214	214	155	155	135	135
S14_P6b_16_4	P6b	324	324	125	131	117	129	183	183	188	220	146	146	NA	NA	NA	NA	199	220	73	78	147	160	240	240	142	142	129	139	290	302	163	174	165	165	234	246	61	64	137	140	167	181	NA	NA	145	155	NA	NA
S14_P6b_26_4	P6b	321	321	131	131	121	125	180	180	220	220	151	159	NA	NA	NA	NA	199	213	73	73	145	145	232	232	127	142	129	129	302	302	NA	NA	165	171	249	251	61	64	NA	NA	167	167	217	219	NA	NA	135	135
S14_P6b_8_3	P6b	321	321	122	128	125	125	183	183	188	220	159	159	NA	NA	NA	NA	220	223	69	69	147	152	NA	NA	124	139	129	145	290	302	160	163	165	165	243	249	61	64	137	140	167	167	214	214	155	156	132	135
S14_P3b_11_1	P3b	315	315	122	128	121	125	186	186	217	220	166	166	134	146	NA	NA	219	219	73	73	147	147	NA	NA	136	142	129	129	302	302	163	169	165	171	249	249	61	61	144	144	167	167	234	234	155	155	132	132
S14_P3b_14_3	P3b	315	315	122	122	125	125	183	183	217	217	155	155	136	136	87	91	214	214	69	69	156	160	238	238	139	142	129	129	302	302	163	163	171	171	249	249	61	61	138	138	167	173	208	234	150	155	135	135
S14_P3b_27_3	P3b	315	315	116	116	121	121	183	186	217	217	155	159	NA	NA	NA	NA	NA	NA	69	69	147	160	240	240	139	142	129	129	302	302	157	157	NA	NA	245	249	61	61	137	144	167	167	NA	NA	NA	NA	132	135
S14_P3b_36_1	P3b	315	321	116	128	125	125	183	186	220	223	156	167	134	136	NA	NA	214	222	78	78	152	160	NA	NA	142	142	129	129	290	302	163	163	171	171	243	249	NA	NA	137	144	167	185	NA	NA	155	157	132	132
S14_P3b_36_4	P3b	321	324	116	116	125	129	183	186	217	220	156	156	NA	NA	91	97	214	214	73	73	147	152	NA	NA	NA	NA	129	129	290	302	163	163	165	171	245	249	61	61	NA	NA	167	173	NA	NA	155	157	132	135
C14_P9b_14_2	P9b	308	321	116	128	121	121	186	186	217	220	155	159	NA	NA	NA	NA	214	217	69	69	152	152	237	237	142	142	129	129	290	302	NA	NA	NA	NA	245	251	61	61	140	140	189	210	214	219	NA	NA	NA	NA
C14_P9b_14_4	P9b	308	308	128	128	121	125	183	186	220	220	155	155	NA	NA	82	82	170	196	69	69	152	152	237	237	142	142	129	129	290	302	160	171	165	165	245	251	61	61	137	137	173	210	208	219	NA	NA	NA	NA
C14_P9b_18_1	P9b	315	315	128	131	121	125	186	186	209	220	155	170	141	141	NA	NA	173	217	69	69	152	159	NA	NA	142	142	129	129	290	302	157	160	162	162	NA	NA	61	61	137	137	171	189	222	231	NA	NA	132	132
C14_P9b_19_1	P9b	318	318	116	131	121	121	183	183	220	220	159	167	134	146	NA	NA	214	214	69	69	152	166	NA	NA	110	142	129	129	290	302	157	163	168	174	246	255	61	61	140	140	167	210	214	219	150	150	NA	NA
C14_P9b_19_4	P9b	315	318	116	131	121	121	183	186	217	220	159	164	141	146	NA	NA	214	214	69	69	NA	NA	NA	NA	NA	NA	129	129	290	290	157	163	NA	NA	NA	NA	61	61	NA	NA	192	210	214	219	155	155	138	138
C14_P9b_23_4	P9b	308	318	116	131	121	121	183	183	217	220	159	164	NA	NA	NA	NA	196	217	69	69	152	172	NA	NA	142	142	129	129	290	302	163	163	NA	NA	245	255	61	61	138	138	167	167	219	219	150	150	132	132
C14_M7b_22_1	M7b	315	315	128	128	125	125	183	183	217	217	146	146	NA	NA	NA	NA	NA	NA	69	69	NA	NA	238	238	139	139	129	139	302	302	160	163	165	171	243	243	61	61	140	140	192	192	219	219	NA	NA	NA	NA
C14_M7b_28_4	M7b	315	321	116	128	121	125	171	177	217	217	146	151	NA	NA	NA	NA	213	219	69	69	147	160	238	238	138	142	129	129	302	302	163	163	165	165	243	243	61	64	140	142	NA	NA	214	214	NA	NA	NA	NA
C14_M7b_7_2	M7b	321	321	116	128	121	125	183	186	217	220	146	167	134	137	87	86	219	219	69	69	150	152	NA	NA	136	139	129	129	302	302	160	171	NA	NA	251	255	61	61	137	140	171	185	214	217	145	155	132	132
C14_P1a_33_1	P1a	321	321	128	131	129	129	183	183	220	220	159	159	NA	NA	NA	NA	214	214	69	73	152	152	240	240	136	136	129	129	302	302	157	163	NA	NA	NA	NA	61	64	137	137	189	189	219	219	157	158	NA	NA
C14_P1a_34_4	P1a	321	321	128	131	121	129	183	183	220	220	155	159	NA	NA	NA	NA	214	217	73	73	152	152	240	240	136	136	129	129	290	302	157	163	NA	NA	255	255	61	64	137	137	167	189	219	219	NA	NA	128	128
C14_P1a_35_4	P1a	312	321	131	131	121	121	183	183	220	220	159	159	NA	NA	NA	NA	214	214	69	73	152	152	240	240	136	136	129	150	302	302	157	163	165	174	252	255	NA	NA	137	137	171	189	219	219	158	158	NA	NA
C14_P1a_4_4	P1a	312	321	131	131	121	121	183	183	220	220	155	159	141	154	NA	NA	214	217	NA	NA	147	152	240	240	136	136	129	129	302	302	157	157	165	174	255	255	NA	NA	137	137	189	189	219	219	NA	NA	122	122
C14_P9a_11_4	P9a	315	321	128	131	129	129	186	186	220	220	147	155	NA	NA	NA	NA	218	220	69	69	150	150	NA	NA	139	142	129	129	290	302	NA	NA	NA	NA	240	243	64	64	NA	NA	188	188	214	222	155	158	NA	NA
C14_P9a_43_1	P9a	315	315	122	128	121	121	183	183	217	217	155	159	138	140	NA	NA	220	220	69	73	150	150	238	238	136	136	129	129	302	302	157	163	174	174	240	240	61	61	137	137	189	189	214	222	NA	NA	NA	NA
C14_M6a_11_2	M6a	321	321	119	128	121	125	183	183	197	220	146	146	134	137	NA	NA	196	196	69	69	145	152	235	238	138	138	129	129	302	302	163	163	165	165	249	265	NA	NA	140	142	167	167	214	217	NA	NA	132	132
C14_M6a_14_4	M6a	321	321	128	128	121	125	186	186	197	220	167	167	NA	NA	NA	NA	196	213	69	69	145	145	238	238	142	146	129	139	302	302	NA	NA	165	165	255	255	64	64	138	139	189	189	219	219	150	155	132	132
C14_M6a_6_4	M6a	321	321	111	111	121	125	177	183	197	220	155	155	129	134	NA	NA	196	196	69	69	150	152	234	237	142	146	129	139	302	302	163	163	165	168	245	255	64	64	138	138	194	194	219	219	NA	NA	NA	NA
C14_M6a_8_4	M6a	321	321	111	128	121	125	171	177	220	220	146	146	134	136	NA	NA	196	196	69	69	150	152	235	235	133	142	129	129	302	302	163	163	165	165	NA	NA	64	64	138	139	194	194	214	219	NA	NA	NA	NA
C14_P10a_2_1	P10a	308	315	128	128	121	121	177	180	223	223	146	155	137	140	87	97	214	214	69	69	147	147	236	236	121	136	129	129	302	302	NA	NA	162	177	249	255	61	61	137	140	171	189	219	219	145	156	132	132
C14_P10a_25_1	P10a	315	321	114	128	121	121	177	180	223	223	159	171	NA	NA	NA	NA	214	214	69	73	NA	NA	236	236	136	136	129	129	302	302	160	166	162	171	NA	NA	NA	NA	137	137	171	171	208	222	NA	NA	NA	NA
C14_M8a_31_4	M8a	315	315	128	128	121	125	180	183	197	197	146	146	NA	NA	NA	NA	213	223	69	69	147	168	NA	NA	139	142	129	129	302	302	160	160	165	165	249	249	61	64	138	138	194	194	219	231	NA	NA	NA	NA
C14_M8a_38_1	M8a	308	315	128	131	121	125	183	186	197	217	146	157	134	144	NA	NA	213	223	69	69	145	156	NA	NA	130	139	129	129	290	302	160	171	168	174	NA	NA	61	64	137	137	170	185	214	219	150	157	NA	NA
C14_P5b_13_1	P5b	321	321	128	128	121	125	180	183	188	220	146	155	NA	NA	NA	NA	217	217	69	78	152	152	233	238	142	142	129	129	302	302	148	157	165	168	246	255	61	64	136	139	167	167	214	214	NA	NA	NA	NA
C14_P6b_1_4	P6b	321	324	128	131	121	125	183	183	220	220	159	159	NA	NA	NA	NA	214	214	73	73	171	176	235	235	142	142	129	139	290	302	NA	NA	NA	NA	240	246	61	61	137	137	167	181	214	219	145	155	132	135
C14_P6b_21_4	P6b	321	321	125	128	121	121	183	183	189	212	146	163	NA	NA	NA	NA	185	214	NA	NA	NA	NA	235	235	142	142	129	136	302	302	160	160	165	168	NA	NA	61	69	140	140	167	181	211	219	145	155	NA	NA
C14_P3b_14_4	P3b	315	315	111	116	125	125	186	186	217	223	155	155	NA	NA	NA	NA	214	214	69	69	NA	NA	238	238	139	139	NA	NA	302	302	157	163	171	171	240	249	61	61	142	142	167	167	234	234	NA	NA	NA	NA
C14_P3b_16_1	P3b	315	315	122	131	125	125	183	186	188	217	155	159	NA	NA	NA	NA	156	219	69	69	152	156	NA	NA	NA	NA	129	129	302	302	157	157	NA	NA	249	249	61	61	137	137	173	173	226	234	150	150	NA	NA
C14_P3b_27_4	P3b	315	315	116	128	125	125	183	186	188	220	151	155	NA	NA	NA	NA	156	219	69	73	152	160	234	236	130	142	129	129	302	302	169	169	NA	NA	249	249	64	64	NA	NA	167	167	214	234	150	155	NA	NA
C14_P3b_5_4	P3b	308	315	122	122	125	125	171	183	217	217	155	159	NA	NA	NA	NA	214	219	69	69	156	156	234	240	136	139	129	129	302	302	157	157	171	171	NA	NA	61	61	142	142	173	173	NA	NA	150	155	NA	NA
S14_P9b_14_3	P9b	308	308	128	128	121	121	183	183	220	220	155	159	NA	NA	NA	NA	170	214	69	69	152	152	237	237	142	142	129	129	302	302	163	171	159	159	NA	NA	NA	NA	138	138	210	210	208	219	NA	NA	132	135
S14_P9b_19_4	P9b	315	318	116	131	121	125	183	183	217	220	155	159	NA	NA	82	82	214	214	69	69	152	166	NA	NA	142	142	129	129	290	302	157	163	168	174	NA	NA	61	61	140	140	189	210	208	219	NA	NA	132	142
S14_P9b_24_1	P9b	308	315	116	128	121	121	183	186	217	220	155	159	134	141	NA	NA	134	134	69	69	172	172	238	238	121	121	129	129	302	302	157	160	165	174	243	255	61	61	138	138	171	210	NA	NA	NA	NA	NA	NA
S14_M7b_19_1	M7b	312	315	122	128	125	125	174	186	217	217	146	151	NA	NA	86	93	213	213	69	69	147	182	238	238	142	142	129	129	302	302	163	166	165	165	243	252	61	64	138	142	185	185	214	217	155	157	NA	NA
S14_M7b_28_2	M7b	312	321	114	119	129	129	183	183	217	220	159	159	134	136	NA	NA	156	156	69	69	145	164	NA	NA	142	142	129	150	290	302	151	163	165	165	246	255	61	64	NA	NA	167	171	214	214	NA	NA	NA	NA
S14_P1a_33_2	P1a	315	315	128	128	121	121	186	186	217	217	146	146	NA	NA	NA	NA	213	213	69	69	145	145	234	234	142	142	129	129	302	302	163	171	168	168	243	243	61	61	138	142	167	189	214	219	NA	NA	132	132
S14_P1a_4_3	P1a	312	321	128	131	121	125	183	183	220	220	159	159	143	154	NA	NA	214	214	69	78	152	152	NA	NA	136	139	129	129	302	302	NA	NA	165	165	255	255	61	64	137	137	189	189	219	219	NA	NA	132	132
S14_P1a_9_4	P1a	312	321	131	131	121	129	183	186	220	220	155	155	129	143	NA	NA	214	214	NA	NA	152	152	240	240	NA	NA	150	150	302	302	157	163	177	177	255	255	61	61	NA	NA	189	189	219	219	156	156	NA	NA
S14_P9a_10_1	P9a	315	315	131	131	121	129	186	186	215	217	155	163	NA	NA	NA	NA	215	215	69	73	150	159	238	238	121	139	NA	NA	290	302	160	163	165	171	249	249	61	64	141	141	189	192	222	222	NA	NA	NA	NA
S14_P9a_10_4	P9a	315	318	128	131	121	129	186	186	220	223	159	163	136	141	NA	NA	159	215	73	73	150	159	238	238	NA	NA	129	129	302	302	160	163	165	174	249	249	61	61	141	141	192	192	214	222	145	145	132	135
S14_P9a_20_2	P9a	308	315	128	131	121	121	177	180	220	220	167	167	NA	NA	NA	NA	215	215	69	73	147	150	237	237	139	142	129	129	302	302	157	157	165	165	240	249	61	61	137	140	188	188	214	219	NA	NA	NA	NA
S14_P9a_20_3	P9a	308	315	128	131	129	129	177	186	220	220	155	167	140	140	NA	NA	215	215	69	69	150	159	237	237	136	139	NA	NA	290	302	160	163	165	165	240	249	61	61	141	141	192	192	219	222	155	158	NA	NA
S14_P9a_30_2	P9a	321	321	128	128	121	129	183	186	NA	NA	159	163	140	154	87	87	209	218	NA	NA	150	150	236	236	NA	NA	129	129	302	302	NA	NA	165	165	NA	NA	61	69	137	140	189	192	222	226	145	158	132	132
S14_P9a_6_2	P9a	315	315	128	128	121	129	180	183	220	226	147	147	NA	NA	NA	NA	153	159	69	69	137	150	237	237	NA	NA	129	129	302	302	NA	NA	165	171	249	261	64	64	138	141	NA	NA	208	214	155	158	NA	NA
S14_P9a_6_3	P9a	318	321	128	131	129	129	177	183	215	226	155	155	NA	NA	NA	NA	209	218	69	69	NA	NA	NA	NA	121	142	129	129	302	302	148	163	165	165	249	249	64	64	137	137	192	192	NA	NA	NA	NA	NA	NA
S14_M6a_3_2	M6a	315	315	111	125	125	125	171	183	220	220	146	146	NA	NA	NA	NA	196	196	69	69	150	152	235	238	138	146	NA	NA	302	302	NA	NA	NA	NA	NA	NA	64	64	138	140	167	194	217	226	NA	NA	NA	NA
S14_P10a_2_1	P10a	315	324	128	128	121	121	177	186	223	223	155	159	NA	NA	NA	NA	214	214	69	73	147	152	236	236	136	139	129	129	302	302	160	163	162	177	NA	NA	NA	NA	NA	NA	171	174	219	222	145	145	NA	NA
S14_P10a_22_4	P10a	315	315	128	131	121	121	177	183	220	223	146	155	129	134	NA	NA	214	214	69	73	NA	NA	236	238	NA	NA	129	129	302	302	163	163	165	165	240	255	NA	NA	139	139	189	189	219	222	156	158	NA	NA
S14_M8a_18_2	M8a	321	321	128	128	125	125	174	183	217	217	163	163	NA	NA	NA	NA	196	196	69	69	150	150	237	237	138	142	129	136	302	302	160	163	165	168	243	249	64	64	138	142	192	192	214	214	NA	NA	NA	NA
S14_M8a_31_3	M8a	315	315	128	128	125	125	183	183	197	197	157	157	NA	NA	NA	NA	223	223	69	69	147	156	238	238	139	142	129	129	302	302	160	160	165	165	249	249	64	64	138	138	194	194	219	219	NA	NA	NA	NA
S14_P2b_10_2	P2b	315	321	114	131	125	130	183	183	209	220	159	159	126	126	NA	NA	156	223	69	69	147	164	236	236	139	139	129	129	302	302	163	163	NA	NA	240	240	61	61	NA	NA	171	171	214	214	155	157	132	135
S14_P2b_23_4	P2b	321	321	131	131	121	121	183	183	220	220	156	159	129	140	NA	NA	212	212	69	69	147	152	238	238	139	139	129	129	290	302	163	171	165	165	237	243	64	64	136	136	167	171	214	222	145	155	NA	NA
S14_P5b_12_2	P5b	315	315	125	125	125	125	183	186	217	220	146	146	135	146	NA	NA	212	212	69	78	152	160	239	239	139	142	129	139	290	290	154	154	165	165	NA	NA	NA	NA	136	138	167	167	214	214	NA	NA	NA	NA
S14_P5b_4_3	P5b	321	321	122	131	129	129	183	186	188	188	146	146	132	145	NA	NA	214	218	69	69	160	160	237	239	142	142	129	136	290	302	157	157	165	165	246	246	64	64	137	137	189	189	208	211	NA	NA	NA	NA
S14_P5b_5_2	P5b	321	321	128	131	121	129	183	183	220	223	159	159	NA	NA	NA	NA	214	214	78	78	152	152	240	240	139	149	129	150	302	302	163	163	165	174	255	255	61	61	137	137	189	189	219	219	NA	NA	NA	NA
S14_P6b_14_4	P6b	315	321	114	128	117	117	183	186	NA	NA	151	159	140	140	NA	NA	NA	NA	NA	NA	166	166	237	237	127	139	129	129	302	302	154	163	168	171	240	249	61	61	137	142	167	181	219	219	145	145	NA	NA
S14_P3b_13_2	P3b	308	308	116	122	121	125	NA	NA	220	226	NA	NA	NA	NA	NA	NA	214	214	69	73	147	152	239	239	142	142	129	129	302	302	157	157	NA	NA	240	249	61	61	NA	NA	185	185	214	214	155	155	NA	NA
S14_P3b_15_1	P3b	315	315	116	116	125	125	186	186	220	220	159	159	144	144	87	95	214	214	69	78	147	160	238	238	142	142	129	129	302	302	157	157	171	171	249	249	NA	NA	137	137	167	167	NA	NA	NA	NA	132	135
S14_P3b_15_3	P3b	315	315	116	128	121	125	183	186	217	217	155	155	NA	NA	NA	NA	214	219	69	78	156	156	240	240	NA	NA	129	129	302	302	157	169	168	171	249	249	61	61	137	144	167	167	214	234	155	155	132	132
C14_P9b_12_1	P9b	315	321	128	131	121	125	180	186	217	220	159	159	NA	NA	NA	NA	211	217	69	69	152	166	236	238	142	142	129	129	290	302	157	157	159	165	251	255	61	64	139	139	192	192	214	231	NA	NA	NA	NA
C14_P9b_18_4	P9b	315	315	131	131	125	129	186	186	220	220	155	167	NA	NA	NA	NA	186	186	69	69	159	172	NA	NA	142	142	129	129	290	290	157	171	162	174	251	251	61	61	137	137	171	171	214	231	NA	NA	NA	NA
C14_P9b_19_2	P9b	318	318	116	131	121	121	183	186	217	217	NA	NA	NA	NA	NA	NA	213	217	69	69	172	172	NA	NA	142	142	129	129	290	302	NA	NA	165	174	243	246	61	61	140	140	171	192	NA	NA	145	158	NA	NA
C14_P9b_23_1	P9b	318	321	NA	NA	121	129	183	186	209	217	155	164	NA	NA	NA	NA	134	214	69	69	152	166	236	236	142	142	129	129	290	302	163	171	165	168	245	251	61	61	138	138	167	210	214	219	NA	NA	NA	NA
C14_P9b_26_1	P9b	321	321	131	131	125	125	186	186	220	220	146	146	NA	NA	NA	NA	213	213	73	78	NA	NA	NA	NA	133	133	129	129	302	302	160	163	158	168	249	249	NA	NA	140	140	189	194	214	214	155	157	NA	NA
C14_P9b_28_3	P9b	315	315	NA	NA	121	121	183	186	220	220	155	159	NA	NA	NA	NA	134	134	69	69	NA	NA	238	238	139	142	129	129	NA	NA	157	163	158	161	240	249	NA	NA	140	140	171	192	214	219	150	155	NA	NA
C14_M7b_12_1	M7b	315	315	NA	NA	121	121	177	180	223	223	146	159	NA	NA	NA	NA	214	214	69	73	147	147	236	236	136	136	129	129	302	302	163	163	162	177	249	255	61	61	137	137	171	192	208	219	145	155	NA	NA
C14_M7b_2_4	M7b	315	321	NA	NA	121	125	171	186	217	217	155	167	NA	NA	NA	NA	223	223	69	69	152	172	238	238	139	146	NA	NA	290	302	160	171	165	171	243	251	61	61	142	142	167	167	214	217	NA	NA	NA	NA
C14_M7b_22_2	M7b	315	315	128	131	121	125	171	186	217	217	146	151	NA	NA	NA	NA	213	213	69	69	147	152	238	238	136	142	129	139	302	302	163	171	168	171	243	243	64	64	140	142	185	185	217	219	155	155	NA	NA
C14_M7b_3_1	M7b	321	324	128	131	125	125	171	183	217	217	NA	NA	NA	NA	NA	NA	219	223	69	69	182	182	238	238	136	142	129	129	290	302	160	171	168	171	243	255	NA	NA	142	142	185	185	208	217	NA	NA	NA	NA
C14_M7b_6_4	M7b	321	324	128	131	121	125	183	186	NA	NA	151	171	NA	NA	NA	NA	223	223	69	69	NA	NA	238	238	121	142	NA	NA	302	302	163	171	NA	NA	243	255	61	64	140	140	185	185	214	219	157	158	NA	NA
C14_P1a_31_4	P1a	308	321	NA	NA	129	129	183	186	220	220	NA	NA	NA	NA	NA	NA	214	214	69	69	152	152	240	240	136	136	NA	NA	302	302	157	157	174	174	249	255	61	76	137	137	189	189	219	219	156	156	NA	NA
C14_P9a_10_2	P9a	315	321	NA	NA	121	121	183	183	215	220	155	163	NA	NA	NA	NA	159	215	73	73	150	159	237	239	139	142	129	129	290	302	157	160	159	171	240	249	NA	NA	140	140	189	189	208	222	NA	NA	NA	NA
C14_P9a_11_2	P9a	308	315	128	128	121	129	186	186	217	220	146	163	NA	NA	NA	NA	153	218	69	69	150	150	234	238	139	142	129	129	290	302	160	160	165	165	240	249	61	64	137	137	167	167	214	222	155	155	NA	NA
C14_P9a_29_1	P9a	315	315	NA	NA	125	129	183	183	217	217	NA	NA	NA	NA	NA	NA	214	222	69	69	152	156	240	240	139	142	129	129	302	302	157	157	168	171	249	249	64	64	142	142	167	173	234	234	145	150	NA	NA
C14_P9a_30_3	P9a	308	321	128	128	129	129	183	186	220	226	NA	NA	NA	NA	NA	NA	209	215	69	73	150	159	236	236	139	142	129	129	290	302	157	163	165	174	240	252	64	69	138	140	NA	NA	214	222	155	158	NA	NA
C14_P9a_30_4	P9a	321	321	NA	NA	129	129	183	183	220	220	163	163	NA	NA	NA	NA	215	218	NA	NA	150	150	238	238	139	139	129	129	290	302	157	163	165	171	240	252	64	64	140	140	189	189	214	222	158	158	NA	NA
C14_M6a_10_4	M6a	321	321	119	128	125	125	171	183	220	220	159	167	NA	NA	NA	NA	217	217	69	69	145	147	NA	NA	121	139	129	129	302	302	163	163	165	168	243	249	61	61	NA	NA	167	189	214	219	155	158	NA	NA
C14_M6a_11_4	M6a	321	321	NA	NA	121	125	171	183	197	197	146	146	NA	NA	NA	NA	196	214	69	69	145	168	235	235	146	146	NA	NA	302	302	163	163	165	168	249	249	61	61	142	142	167	189	217	217	150	150	NA	NA
C14_M6a_3_1	M6a	315	321	131	131	117	125	177	183	188	220	155	159	NA	NA	NA	NA	223	223	NA	NA	NA	NA	240	240	124	142	NA	NA	302	302	160	163	165	168	246	246	61	61	140	140	167	167	217	219	NA	NA	NA	NA
C14_M6a_8_1	M6a	321	321	111	128	125	125	174	174	220	220	146	146	NA	NA	NA	NA	196	196	69	69	152	152	235	235	133	146	129	139	302	302	163	163	165	168	245	245	61	76	138	138	167	189	219	219	157	157	NA	NA
C14_P10a_43_3	P10a	315	315	NA	NA	121	121	NA	NA	223	223	NA	NA	NA	NA	NA	NA	NA	NA	73	73	NA	NA	236	236	139	142	129	129	302	302	160	163	171	171	255	255	NA	NA	137	137	189	198	208	214	NA	NA	NA	NA
C14_P10a_9_4	P10a	315	321	128	131	121	121	180	183	223	223	146	159	NA	NA	NA	NA	214	214	73	73	145	152	238	238	142	142	129	129	302	302	157	163	162	162	240	249	61	61	137	137	171	171	214	219	NA	NA	NA	NA
C14_M8a_13_3	M8a	315	315	NA	NA	125	125	180	180	197	197	146	159	NA	NA	NA	NA	141	213	69	69	NA	NA	238	238	139	139	129	129	302	302	160	171	165	165	249	249	64	69	138	140	185	185	214	214	150	155	NA	NA
C14_M8a_18_4	M8a	315	324	NA	NA	121	125	174	186	217	220	146	146	NA	NA	NA	NA	NA	NA	69	69	NA	NA	238	238	121	138	129	129	302	302	160	163	165	168	249	251	64	64	137	142	167	194	214	222	NA	NA	NA	NA
C14_M8a_22_1	M8a	315	315	NA	NA	125	125	180	180	197	220	146	146	NA	NA	NA	NA	213	223	69	69	147	147	238	238	142	155	129	129	290	302	160	160	168	168	249	249	61	64	138	140	185	194	214	214	150	157	NA	NA
C14_M8a_22_4	M8a	315	315	128	128	125	125	180	180	197	197	146	146	NA	NA	NA	NA	213	213	69	69	145	147	232	232	139	142	129	129	290	302	160	160	165	168	249	251	61	64	138	138	185	185	214	214	NA	NA	NA	NA
C14_M8a_38_2	M8a	315	315	NA	NA	125	125	183	186	NA	NA	146	146	NA	NA	NA	NA	NA	NA	73	73	NA	NA	232	238	139	142	129	129	302	302	163	171	168	168	249	249	NA	NA	NA	NA	170	194	214	219	150	155	NA	NA
C14_P2b_10_4	P2b	312	321	131	131	125	125	183	183	209	217	159	163	NA	NA	NA	NA	156	156	69	69	147	164	238	238	139	142	129	145	302	302	163	163	NA	NA	246	255	61	64	138	140	167	167	214	238	155	155	NA	NA
C14_P2b_12_1	P2b	312	315	NA	NA	121	121	177	180	217	223	NA	NA	NA	NA	NA	NA	214	214	69	73	NA	NA	236	236	139	142	NA	NA	302	302	160	160	162	162	249	249	61	61	140	145	174	189	219	219	NA	NA	NA	NA
C14_P2b_21_4	P2b	305	321	NA	NA	NA	NA	183	186	220	220	156	156	NA	NA	NA	NA	209	209	69	69	137	147	238	238	139	146	129	129	290	302	160	171	159	162	243	246	64	64	136	136	192	192	214	214	NA	NA	NA	NA
C14_P2b_3_4	P2b	321	321	111	114	129	129	183	183	220	220	NA	NA	NA	NA	NA	NA	209	211	69	69	147	155	236	238	136	139	129	129	290	290	151	163	165	165	255	255	61	61	136	136	171	189	214	214	145	155	NA	NA
C14_P2b_31_2	P2b	321	321	114	125	125	129	183	183	220	220	159	159	NA	NA	NA	NA	156	156	69	69	NA	NA	238	238	139	142	NA	NA	302	302	163	163	165	165	240	240	64	64	144	144	171	171	214	214	145	145	NA	NA
C14_P2b_31_4	P2b	321	321	114	125	125	125	183	183	209	220	NA	NA	NA	NA	NA	NA	156	156	69	69	164	164	236	238	139	139	129	129	302	302	163	163	165	165	240	255	64	64	140	144	171	171	214	214	NA	NA	NA	NA
C14_P2b_34_1	P2b	321	321	125	131	129	129	183	183	220	220	168	168	NA	NA	NA	NA	214	214	69	69	147	164	237	237	142	142	129	129	302	302	163	163	165	165	246	255	NA	NA	144	144	167	167	214	214	145	157	NA	NA
C14_P2b_6_3	P2b	321	321	NA	NA	125	129	183	183	188	220	NA	NA	NA	NA	97	97	211	223	69	69	145	147	238	238	139	142	129	150	302	302	163	163	165	171	246	255	64	64	136	138	171	192	226	226	NA	NA	NA	NA
C14_P5b_26_1	P5b	312	321	NA	NA	121	121	183	183	220	220	155	159	NA	NA	NA	NA	214	217	73	79	152	152	240	240	136	136	NA	NA	302	302	157	163	165	174	252	255	61	61	137	137	189	189	219	219	156	158	NA	NA
C14_P5b_4_4	P5b	321	321	122	131	125	129	186	186	188	188	NA	NA	NA	NA	NA	NA	218	218	69	69	147	160	237	237	139	142	136	136	290	290	174	174	165	165	243	246	64	64	137	137	167	189	208	211	158	158	NA	NA
C14_P6b_1_1	P6b	308	308	NA	NA	125	125	171	186	220	220	NA	NA	NA	NA	NA	NA	134	213	69	69	147	147	232	239	139	142	129	150	NA	NA	163	163	165	165	255	255	64	64	137	140	192	192	238	238	NA	NA	NA	NA
C14_P6b_31_4	P6b	321	321	128	131	121	129	183	183	220	223	159	159	NA	NA	NA	NA	NA	NA	69	69	NA	NA	NA	NA	139	142	129	129	290	302	163	163	NA	NA	243	249	61	69	137	139	NA	NA	214	219	150	155	NA	NA
C14_P3b_17_4	P3b	315	324	116	128	125	129	186	186	217	223	163	167	NA	NA	NA	NA	179	214	78	78	147	147	236	238	139	142	129	134	NA	NA	157	169	NA	NA	245	249	61	61	137	142	167	173	214	234	155	155	NA	NA
S14_P9b_13_3	P9b	308	315	NA	NA	121	121	183	186	217	217	NA	NA	NA	NA	NA	NA	191	214	69	69	150	172	236	236	139	142	129	129	290	302	157	171	174	174	251	254	61	64	140	140	173	210	214	219	NA	NA	NA	NA
S14_P9b_23_4	P9b	318	318	116	131	121	121	183	183	217	217	159	164	NA	NA	NA	NA	214	214	69	69	NA	NA	236	236	142	142	NA	NA	290	302	163	163	165	165	NA	NA	61	61	138	138	167	167	214	214	150	150	NA	NA
S14_P9b_24_2	P9b	315	315	NA	NA	121	125	186	186	217	217	NA	NA	NA	NA	NA	NA	153	196	69	69	152	172	238	238	NA	NA	129	129	302	302	157	160	165	174	255	255	61	61	138	138	192	210	NA	NA	155	164	NA	NA
S14_P9b_26_3	P9b	308	308	128	131	121	121	183	186	217	217	NA	NA	NA	NA	NA	NA	214	214	NA	NA	159	172	238	238	NA	NA	129	129	NA	NA	163	171	159	165	245	245	61	61	137	137	189	192	NA	NA	155	155	NA	NA
S14_P9b_28_2	P9b	315	315	NA	NA	121	125	183	183	223	223	NA	NA	NA	NA	NA	NA	NA	NA	69	69	152	152	238	238	142	142	129	129	290	302	163	163	159	165	245	249	NA	NA	138	140	171	192	219	229	155	158	NA	NA
S14_M7b_3_2	M7b	315	324	128	128	125	125	171	183	217	217	NA	NA	NA	NA	NA	NA	196	223	69	69	NA	NA	238	238	138	142	129	129	290	302	171	171	165	165	243	243	61	61	137	142	167	167	208	214	155	155	NA	NA
S14_M7b_5_3	M7b	315	324	128	128	121	125	174	183	217	217	NA	NA	NA	NA	NA	NA	213	213	69	69	NA	NA	238	238	138	138	129	129	302	302	163	163	165	168	243	243	64	73	140	142	185	189	217	222	155	155	NA	NA
S14_M7b_6_4	M7b	321	324	128	131	125	125	174	186	212	217	146	171	NA	NA	NA	NA	196	223	69	69	182	182	NA	NA	136	142	NA	NA	302	302	171	171	165	165	243	243	61	61	137	142	185	192	214	214	NA	NA	NA	NA
S14_P1a_7_2	P1a	321	321	128	131	NA	NA	186	186	220	220	155	159	NA	NA	NA	NA	214	214	73	79	152	152	240	240	136	136	129	150	290	302	163	163	174	177	252	255	61	64	NA	NA	189	189	219	219	157	157	NA	NA
S14_M6a_11_3	M6a	315	321	119	119	121	125	171	183	197	197	NA	NA	NA	NA	NA	NA	217	217	69	69	152	152	235	235	NA	NA	129	129	NA	NA	163	163	165	168	255	265	61	61	138	142	167	167	214	217	155	155	NA	NA
S14_M6a_3_4	M6a	321	321	119	128	125	125	171	183	220	220	146	167	NA	NA	NA	NA	173	196	69	69	145	152	NA	NA	121	146	129	129	290	302	163	163	165	168	249	249	61	61	140	142	167	194	214	219	155	155	NA	NA
S14_M6a_9_2	M6a	315	321	119	128	121	125	171	177	217	220	146	163	NA	NA	NA	NA	196	217	69	69	145	164	237	237	139	146	129	139	NA	NA	163	163	165	168	243	249	64	64	138	138	189	189	214	226	150	158	NA	NA
S14_P10a_21_4	P10a	315	315	NA	NA	121	121	177	183	223	223	NA	NA	NA	NA	NA	NA	214	214	69	73	NA	NA	236	236	139	139	NA	NA	302	302	160	160	162	177	249	249	61	61	137	137	189	189	209	209	145	145	NA	NA
S14_P10a_28_2	P10a	305	315	NA	NA	121	121	177	183	223	223	159	166	NA	NA	NA	NA	214	214	69	73	147	147	238	238	136	142	NA	NA	290	302	157	163	168	171	243	255	61	64	137	142	171	189	214	222	NA	NA	NA	NA
S14_P2b_10_4	P2b	312	321	131	131	125	125	183	183	220	220	159	159	NA	NA	NA	NA	156	156	69	69	164	164	237	237	139	139	129	129	NA	NA	163	163	159	159	240	246	61	61	140	140	167	171	214	214	155	155	NA	NA
S14_P2b_11_4	P2b	315	321	119	119	129	129	NA	NA	217	220	159	159	NA	NA	NA	NA	156	223	69	69	147	147	238	238	NA	NA	129	129	302	302	160	163	165	171	246	255	64	64	136	136	167	167	214	214	NA	NA	NA	NA
S14_P2b_21_2	P2b	305	321	131	131	121	121	183	186	220	220	155	163	NA	NA	NA	NA	209	209	69	69	137	145	236	240	139	146	129	129	290	290	160	171	159	162	246	246	64	64	NA	NA	171	192	214	219	155	155	NA	NA
S14_P2b_34_2	P2b	312	312	128	131	125	129	183	183	220	220	NA	NA	NA	NA	NA	NA	156	156	69	69	164	164	238	238	139	142	129	145	NA	NA	163	163	159	168	240	255	64	64	138	140	167	167	214	214	NA	NA	NA	NA
S14_P2b_8_3	P2b	321	321	NA	NA	129	129	183	183	188	220	NA	NA	NA	NA	NA	NA	NA	NA	69	73	147	164	238	238	139	142	129	145	290	302	163	163	159	171	255	255	NA	NA	138	144	167	167	214	214	145	145	NA	NA
S14_P2b_8_4	P2b	312	312	131	131	129	129	183	183	209	220	NA	NA	NA	NA	NA	NA	223	223	52	52	147	147	236	236	139	142	129	129	290	302	151	163	159	165	246	255	61	61	140	140	192	192	214	214	NA	NA	NA	NA
S14_P5b_1_3	P5b	308	308	NA	NA	121	129	186	186	188	188	155	159	NA	NA	NA	NA	218	218	NA	NA	152	172	239	239	142	142	150	150	302	302	174	174	168	168	246	246	61	64	137	140	167	181	214	214	145	145	NA	NA
S14_P5b_4_2	P5b	321	321	114	125	121	121	180	183	188	220	146	155	NA	NA	NA	NA	199	214	78	78	150	155	NA	NA	139	142	NA	NA	290	302	148	148	165	165	246	255	61	61	136	138	167	167	214	219	145	145	NA	NA
S14_P5b_8_4	P5b	315	321	131	131	121	121	183	186	217	220	146	146	NA	NA	NA	NA	217	217	69	69	147	156	NA	NA	139	142	145	145	290	302	163	163	165	168	240	240	61	61	136	139	167	167	214	226	145	150	NA	NA
S14_P6b_11_2	P6b	321	321	NA	NA	121	129	171	183	189	189	151	155	NA	NA	NA	NA	144	199	69	69	147	160	232	232	124	139	NA	NA	302	302	174	174	168	171	249	249	73	73	140	140	189	192	208	208	155	155	NA	NA
S14_P6b_21_4	P6b	315	321	128	128	121	129	171	183	212	220	159	163	NA	NA	NA	NA	213	213	NA	NA	147	150	238	240	133	139	NA	NA	290	302	157	163	NA	NA	240	255	61	64	137	140	167	174	211	214	NA	NA	NA	NA
S14_P3b_14_4	P3b	315	315	116	122	125	125	186	186	220	220	155	155	NA	NA	87	91	214	214	69	69	147	156	NA	NA	139	139	129	129	302	302	157	163	171	171	249	249	61	61	142	142	167	173	234	234	NA	NA	NA	NA
S14_P3b_28_3	P3b	324	324	111	131	125	129	183	186	217	217	NA	NA	NA	NA	NA	NA	156	219	69	69	147	156	240	240	139	139	129	129	302	302	157	157	159	168	249	249	64	64	142	142	167	173	234	234	150	155	NA	NA
S14_P3b_5_2	P3b	308	308	NA	NA	125	129	183	183	217	217	155	155	NA	NA	NA	NA	214	214	69	69	152	156	238	240	136	142	129	129	302	302	157	163	165	165	249	249	61	64	142	142	167	167	219	238	145	150	NA	NA
C14_P9b_13_1	P9b	308	321	131	131	121	121	183	186	209	217	NA	NA	NA	NA	NA	NA	134	134	NA	NA	150	152	236	236	142	142	129	150	290	302	157	171	165	165	243	243	61	61	140	140	167	210	219	222	150	155	132	135
C14_P9b_13_3	P9b	315	318	NA	NA	121	129	186	186	217	217	NA	NA	140	140	NA	NA	NA	NA	69	69	172	172	236	236	142	142	129	129	290	302	NA	NA	165	165	243	254	61	61	140	140	167	189	214	222	155	155	132	135
C14_P9b_24_3	P9b	308	315	116	128	121	129	183	186	220	220	157	167	NA	NA	NA	NA	NA	NA	69	69	NA	NA	238	238	121	142	NA	NA	290	302	160	160	165	171	251	251	61	61	138	138	171	210	214	222	145	155	132	132
C14_P9b_26_2	P9b	318	321	131	131	121	121	NA	NA	220	220	155	164	NA	NA	NA	NA	170	214	69	69	159	166	NA	NA	NA	NA	129	129	290	290	NA	NA	165	168	NA	NA	61	61	137	137	189	210	219	222	155	155	NA	NA
C14_M7b_2_1	M7b	321	321	NA	NA	125	125	186	186	217	217	146	146	131	144	NA	NA	223	223	69	69	172	182	238	238	142	146	129	129	302	302	171	171	168	168	243	251	NA	NA	142	142	167	171	214	214	155	158	128	135
C14_M7b_3_3	M7b	324	324	NA	NA	125	125	183	186	217	217	155	155	131	137	NA	NA	196	223	69	69	182	182	238	238	136	139	129	129	290	302	NA	NA	165	168	NA	NA	61	61	140	142	174	174	214	238	NA	NA	132	135
C14_M7b_6_2	M7b	321	324	128	131	125	125	174	183	217	217	146	171	136	136	NA	NA	NA	NA	69	69	172	182	238	238	121	136	129	129	302	302	163	171	168	168	243	249	61	61	140	140	NA	NA	214	219	155	158	132	135
C14_P1a_18_4	P1a	315	321	128	128	121	129	183	186	220	220	159	159	NA	NA	NA	NA	214	217	NA	NA	152	152	240	240	NA	NA	129	129	302	302	NA	NA	174	174	255	255	NA	NA	137	137	189	189	219	219	157	157	122	135
C14_P9a_43_2	P9a	315	315	122	128	121	129	NA	NA	217	217	NA	NA	138	140	NA	NA	218	220	69	69	160	160	238	238	124	136	129	129	302	302	NA	NA	171	174	240	249	61	61	137	140	189	189	214	222	145	158	132	135
C14_M6a_14_3	M6a	321	321	128	131	121	121	NA	NA	197	220	146	146	134	137	NA	NA	195	213	69	69	NA	NA	NA	NA	139	142	NA	NA	302	302	163	163	165	168	249	255	NA	NA	138	142	194	194	219	226	150	150	132	135
C14_M6a_5_2	M6a	321	321	111	119	121	125	177	183	209	220	NA	NA	129	134	NA	NA	195	217	69	69	147	150	NA	NA	139	142	NA	NA	290	302	NA	NA	159	165	245	249	64	64	138	140	167	194	NA	NA	155	155	122	132
C14_M6a_7_1	M6a	321	321	NA	NA	121	125	171	183	209	220	NA	NA	129	129	NA	NA	217	217	69	69	145	168	NA	NA	142	142	129	139	302	302	163	163	168	168	243	243	69	69	138	142	189	194	219	226	155	155	122	132
C14_P10a_14_2	P10a	312	315	131	131	121	121	180	180	NA	NA	159	163	NA	NA	NA	NA	214	214	69	69	145	147	238	238	136	139	129	136	302	302	160	163	162	177	249	249	NA	NA	137	140	171	210	214	231	155	155	NA	NA
C14_P10a_25_2	P10a	315	321	128	128	121	121	180	183	197	223	155	159	129	144	NA	NA	214	214	69	73	152	152	236	236	136	142	129	150	302	302	160	163	162	162	255	255	61	64	137	139	171	198	219	219	145	145	135	135
C14_M8a_1_2	M8a	305	312	114	128	121	121	180	183	220	223	146	159	NA	NA	NA	NA	213	213	69	73	147	147	236	236	136	139	129	129	302	302	157	163	NA	NA	255	255	61	64	137	137	189	189	214	222	145	150	125	135
C14_M8a_11_2	M8a	321	324	NA	NA	125	125	177	183	217	220	NA	NA	NA	NA	NA	NA	213	213	78	78	154	154	233	243	133	136	129	129	290	302	160	160	165	168	243	249	61	64	140	142	192	192	231	231	155	157	132	138
C14_M8a_18_1	M8a	321	321	128	128	125	125	174	183	217	220	146	146	134	134	NA	NA	213	213	69	69	150	154	237	243	NA	NA	129	129	302	302	160	163	168	168	243	246	64	64	138	142	192	192	214	214	150	155	138	138
C14_P2b_11_2	P2b	315	318	119	119	129	129	NA	NA	188	220	156	159	NA	NA	NA	NA	209	220	69	69	NA	NA	236	238	139	142	129	129	302	302	160	163	165	165	255	255	61	64	136	136	167	171	NA	NA	NA	NA	135	135
C14_P2b_6_1	P2b	321	321	NA	NA	121	125	183	183	188	220	159	159	139	139	NA	NA	209	223	69	69	147	152	238	238	139	139	129	150	290	290	160	163	165	165	246	246	NA	NA	136	149	171	189	214	214	145	157	132	132
C14_P2b_8_2	P2b	312	321	NA	NA	129	129	183	183	220	220	159	159	134	134	NA	NA	214	214	69	69	164	164	238	238	NA	NA	129	145	290	290	163	163	159	165	255	255	61	64	138	138	167	167	214	214	155	157	132	135
C14_P2b_8_3	P2b	315	321	131	131	125	129	183	183	209	209	156	159	NA	NA	NA	NA	209	209	NA	NA	145	147	237	240	139	139	129	129	290	290	163	171	159	165	NA	NA	64	64	136	136	189	189	219	219	155	155	128	135
C14_P5b_12_3	P5b	315	321	NA	NA	125	125	186	186	188	220	NA	NA	NA	NA	NA	NA	214	214	69	69	NA	NA	233	237	142	146	NA	NA	290	290	154	157	165	168	246	246	NA	NA	136	140	167	167	214	214	150	155	122	132
C14_P5b_26_2	P5b	321	321	125	125	125	129	183	183	220	223	146	146	NA	NA	83	87	156	214	69	69	147	160	232	238	139	139	129	129	290	302	154	154	NA	NA	NA	NA	NA	NA	138	140	NA	NA	208	219	158	158	122	135
C14_P5b_4_2	P5b	315	321	122	125	121	125	186	186	188	220	146	146	NA	NA	NA	NA	214	218	69	69	147	150	235	237	142	142	129	136	290	302	148	157	165	165	NA	NA	64	64	138	138	167	167	208	214	150	150	122	135
C14_P6b_17_3	P6b	321	321	128	131	121	125	183	186	188	220	146	163	NA	NA	NA	NA	220	220	69	69	155	172	237	239	139	139	NA	NA	302	302	160	160	165	168	249	249	61	73	137	142	167	181	214	217	155	155	132	135
C14_P6b_31_3	P6b	305	321	125	128	121	121	183	183	217	223	NA	NA	NA	NA	NA	NA	214	214	NA	NA	NA	NA	235	239	127	139	129	145	290	302	160	163	159	165	NA	NA	64	69	NA	NA	167	181	208	219	145	155	NA	NA
C14_P3b_11_2	P3b	315	315	NA	NA	125	129	183	186	217	220	NA	NA	NA	NA	NA	NA	214	219	69	73	NA	NA	NA	NA	142	142	NA	NA	302	302	NA	NA	168	171	237	245	61	61	138	144	NA	NA	214	234	145	155	NA	NA
C14_P3b_14_1	P3b	324	324	111	122	125	125	183	183	217	220	NA	NA	NA	NA	NA	NA	209	214	69	69	NA	NA	238	238	139	142	NA	NA	302	302	157	157	171	171	249	249	61	61	142	142	167	173	208	208	150	155	NA	NA
S14_P9b_12_1	P9b	308	315	NA	NA	121	125	186	186	217	220	155	159	NA	NA	NA	NA	NA	NA	69	69	147	152	236	238	142	142	129	129	290	290	157	160	159	174	NA	NA	64	64	137	137	192	212	219	222	155	155	132	135
S14_P9b_12_2	P9b	315	315	128	128	119	125	186	186	217	220	NA	NA	141	141	NA	NA	217	217	69	69	166	166	238	238	146	146	129	129	290	290	163	163	159	159	NA	NA	61	64	137	137	192	212	214	222	150	155	132	135
S14_P9b_16_1	P9b	315	321	128	131	121	121	180	186	220	223	155	164	NA	NA	NA	NA	170	214	69	69	147	152	NA	NA	139	142	129	150	290	290	160	163	165	165	NA	NA	61	61	140	140	171	189	214	214	150	155	132	135
S14_P9b_26_2	P9b	308	315	131	131	121	125	183	186	217	220	164	167	NA	NA	NA	NA	134	134	NA	NA	152	159	238	238	142	142	129	129	302	302	160	163	159	165	243	249	61	61	137	139	189	192	NA	NA	155	158	132	135
S14_M7b_5_2	M7b	315	324	NA	NA	125	125	171	174	217	217	NA	NA	NA	NA	NA	NA	213	219	69	69	152	166	238	238	NA	NA	129	129	302	302	163	166	168	171	246	249	61	61	137	140	167	185	217	222	155	155	135	135
S14_M7b_7_2	M7b	321	321	128	128	125	125	186	186	217	217	146	167	NA	NA	NA	NA	NA	NA	69	69	NA	NA	232	238	142	142	129	129	302	302	160	171	165	171	243	255	61	64	138	140	185	185	217	217	155	155	132	132
S14_P1a_13_2-177	P1a	308	321	NA	NA	NA	NA	183	183	220	220	NA	NA	NA	NA	NA	NA	214	214	69	78	152	152	240	240	NA	NA	129	129	302	302	163	163	174	174	255	255	61	61	NA	NA	189	189	219	219	156	156	NA	NA
S14_P1a_31_4	P1a	321	321	NA	NA	121	121	183	183	220	220	NA	NA	NA	NA	NA	NA	214	214	69	73	152	152	240	240	NA	NA	129	129	302	302	157	163	174	174	249	255	61	61	137	137	189	189	219	219	NA	NA	122	135
S14_P1a_5_1	P1a	321	321	131	131	121	121	183	183	220	220	NA	NA	141	141	NA	NA	150	214	NA	NA	152	152	NA	NA	NA	NA	129	150	302	302	157	163	165	174	NA	NA	61	61	137	137	189	189	219	219	157	157	122	122
S14_P9a_10_2	P9a	315	318	NA	NA	121	129	NA	NA	215	220	NA	NA	NA	NA	NA	NA	159	209	69	69	150	159	238	238	NA	NA	129	129	302	302	160	163	165	174	249	249	61	61	137	141	171	192	222	222	145	158	122	122
S14_P9a_11_4	P9a	315	321	NA	NA	129	129	186	186	217	220	NA	NA	NA	NA	NA	NA	209	215	69	69	150	150	236	236	NA	NA	129	129	290	302	NA	NA	165	171	249	249	NA	NA	137	137	188	188	214	214	155	155	148	148
S14_P9a_38_1	P9a	308	321	128	128	129	129	183	183	188	220	NA	NA	145	145	NA	NA	209	215	69	73	150	159	237	237	142	142	129	129	290	302	148	163	165	165	240	249	61	69	137	141	192	192	214	222	145	155	135	142
S14_P9a_38_2	P9a	308	315	128	131	121	129	183	183	215	220	NA	NA	136	145	NA	NA	153	209	73	73	137	150	236	236	142	142	129	129	290	302	157	163	165	171	240	249	61	64	137	140	167	167	214	222	155	155	135	142
S14_M6a_11_2	M6a	321	321	128	128	121	125	183	183	197	197	146	146	134	134	NA	NA	196	196	69	69	145	145	235	235	146	146	129	129	302	302	163	163	165	165	265	265	61	64	142	142	189	189	217	217	150	155	132	132
S14_M6a_11_4	M6a	321	321	NA	NA	125	125	171	171	197	197	NA	NA	134	134	NA	NA	213	217	69	69	152	168	235	235	142	146	129	129	290	302	157	163	165	165	249	255	61	64	138	142	167	167	214	217	150	155	132	135
S14_M6a_9_1	M6a	315	321	119	128	125	125	171	177	220	226	NA	NA	NA	NA	NA	NA	196	217	69	69	NA	NA	NA	NA	139	146	129	139	302	302	160	163	168	168	NA	NA	61	61	138	138	189	189	214	226	155	155	127	127
S14_P10a_43_2	P10a	312	315	128	131	121	121	180	180	223	223	146	155	129	134	NA	NA	214	214	73	73	145	147	NA	NA	139	139	129	129	302	302	160	163	162	162	255	255	61	64	137	137	171	198	214	222	145	156	132	142
S14_M8a_1_2	M8a	315	321	NA	NA	121	125	177	180	223	223	155	166	137	137	87	97	214	214	69	73	147	147	NA	NA	136	136	129	129	302	302	NA	NA	162	171	249	255	61	64	139	142	171	189	219	222	145	145	125	125
S14_M8a_13_2	M8a	315	315	122	128	125	125	180	180	197	220	146	146	137	137	87	95	141	223	69	69	145	147	238	238	155	155	129	129	290	302	160	160	168	168	249	249	NA	NA	138	140	185	194	214	214	150	155	132	138
S14_M8a_18_4	M8a	315	321	NA	NA	125	125	174	183	197	217	146	155	134	146	NA	NA	NA	NA	69	69	154	168	237	243	138	142	129	129	302	302	160	163	168	168	249	249	61	64	140	142	167	194	214	222	150	155	138	138
S14_M8a_22_1	M8a	315	321	111	128	125	125	180	180	197	197	146	146	129	137	NA	NA	223	223	69	69	147	150	NA	NA	NA	NA	129	129	290	302	160	163	168	168	249	249	61	78	138	140	185	185	214	214	150	150	NA	NA
S14_M8a_30_2	M8a	315	315	116	128	125	125	180	186	197	220	146	146	134	134	NA	NA	213	213	69	69	147	168	NA	NA	121	139	129	139	302	302	160	160	168	168	249	249	NA	NA	137	142	194	194	219	219	150	150	132	132
S14_M8a_31_1	M8a	308	315	128	131	125	125	183	183	197	197	146	157	NA	NA	80	87	211	223	69	69	147	156	238	238	139	139	129	129	290	302	160	160	165	174	243	249	61	64	137	137	170	194	214	219	150	155	NA	NA
S14_M8a_35_1	M8a	315	315	NA	NA	125	125	180	180	197	217	146	146	134	134	NA	NA	213	213	69	69	152	168	238	238	155	155	129	129	302	302	160	160	165	168	249	249	61	61	137	137	185	194	219	222	150	150	132	138
S14_M8a_35_2	M8a	315	315	128	131	125	125	180	186	197	220	NA	NA	140	144	NA	NA	211	213	69	69	152	168	238	238	139	142	129	129	302	302	NA	NA	168	174	243	249	64	64	137	140	185	194	214	222	150	157	132	138
S14_P2b_3_2	P2b	315	315	114	114	121	129	183	183	209	220	NA	NA	126	132	97	101	214	223	69	69	145	155	NA	NA	139	142	129	150	290	302	151	160	159	165	240	255	61	64	136	136	167	171	214	226	145	145	132	135
S14_P2b_31_2	P2b	312	321	114	131	129	129	183	183	220	220	159	168	NA	NA	NA	NA	156	156	69	69	164	164	238	238	NA	NA	129	150	290	302	151	163	165	165	240	255	64	64	144	144	167	171	214	214	145	157	132	135
S14_P2b_6_2	P2b	321	321	NA	NA	121	125	183	183	188	209	NA	NA	126	133	NA	NA	211	223	73	73	147	152	NA	NA	139	139	129	150	290	290	NA	NA	165	165	246	255	NA	NA	136	136	171	189	214	226	145	157	NA	NA
S14_P2b_8_1	P2b	312	321	NA	NA	125	129	183	183	209	217	NA	NA	126	141	NA	NA	156	212	69	69	164	164	236	236	139	142	NA	NA	290	302	151	163	165	168	255	255	61	64	136	136	167	171	214	214	145	157	NA	NA
S14_P5b_5_1	P5b	315	321	NA	NA	121	129	171	183	188	223	NA	NA	NA	NA	NA	NA	199	213	69	69	152	152	239	239	139	142	NA	NA	290	290	NA	NA	165	168	243	251	64	64	137	140	189	189	211	214	145	155	122	132
S14_P5b_8_2	P5b	315	321	131	131	121	121	183	186	217	220	NA	NA	NA	NA	NA	NA	213	213	73	78	152	156	NA	NA	139	146	129	129	290	290	160	163	162	168	NA	NA	61	64	NA	NA	167	192	214	226	150	158	122	132
S14_P6b_9_2	P6b	321	321	NA	NA	121	125	174	174	220	220	NA	NA	NA	NA	NA	NA	212	214	69	73	150	152	234	235	124	139	129	129	290	302	148	160	NA	NA	240	249	61	64	137	140	171	181	214	219	155	155	NA	NA
S14_P3b_17_1	P3b	308	321	128	131	125	125	186	186	220	223	156	167	134	146	NA	NA	179	214	69	69	147	147	238	240	142	142	129	129	302	302	163	163	165	177	NA	NA	61	61	142	142	172	172	214	234	155	155	NA	NA
S14_P3b_5_1	P3b	308	321	122	122	121	129	183	183	217	223	NA	NA	NA	NA	NA	NA	214	222	69	69	147	160	NA	NA	139	142	129	134	302	302	157	157	165	171	240	249	64	64	142	142	173	173	NA	NA	145	150	132	135
S13_P9b_13_1	P9b	NA	NA	131	131	121	121	186	186	NA	NA	157	159	NA	NA	82	97	NA	NA	69	78	144	150	NA	NA	142	142	129	129	290	302	NA	NA	165	165	249	254	61	64	140	144	192	210	NA	NA	NA	NA	132	135
S13_M7b_19B_3	M7b	NA	NA	128	131	121	129	183	183	NA	NA	147	159	138	141	83	87	209	209	69	69	150	150	238	238	139	139	129	129	302	302	163	163	159	165	240	249	61	61	140	140	NA	NA	NA	NA	155	158	122	135
S13_M7b_22_3	M7b	NA	NA	128	128	121	125	171	186	217	217	146	151	137	140	87	95	196	196	69	69	NA	NA	238	238	139	142	129	139	302	302	163	166	165	171	243	243	61	64	140	142	185	192	214	219	NA	NA	135	138
S13_P1a_27_4	P1a	NA	NA	128	131	121	129	183	186	220	220	159	159	154	154	87	87	214	217	69	78	152	152	240	240	136	136	129	150	290	302	157	163	174	174	255	255	61	61	137	137	189	189	219	228	156	156	122	142
S13_M8a_31A_2	M8a	NA	NA	128	128	125	125	183	186	197	197	146	146	NA	NA	87	95	213	223	69	69	152	156	238	238	139	139	129	129	302	302	160	160	165	174	243	249	61	64	138	140	185	194	214	222	NA	NA	132	132
S13_P5b_1_2	P5b	NA	NA	114	128	121	125	183	186	220	223	146	155	NA	NA	83	83	218	223	69	69	NA	NA	236	236	139	142	129	139	302	302	171	174	168	174	243	246	61	64	137	137	167	167	214	231	145	145	132	135
S13_P5b_1_3	P5b	NA	NA	114	128	121	125	183	186	188	220	155	155	NA	NA	83	97	156	218	NA	NA	NA	NA	NA	NA	142	142	139	150	302	302	NA	NA	165	168	243	246	61	61	134	137	167	167	214	214	NA	NA	NA	NA
S13_P5b_13_1	P5b	NA	NA	128	128	121	121	180	183	220	220	155	155	132	132	97	97	214	214	69	69	147	166	233	238	139	139	129	129	290	302	154	157	165	165	240	246	61	64	136	138	167	189	214	214	145	145	132	142
S13_P5b_13_2	P5b	NA	NA	128	128	121	121	180	183	220	220	146	155	133	138	83	97	214	214	69	69	NA	NA	233	237	139	142	129	136	290	302	NA	NA	165	171	255	255	61	64	138	138	189	189	NA	NA	145	155	NA	NA
S13_P5b_14_2	P5b	NA	NA	116	122	117	125	183	183	NA	NA	146	163	NA	NA	88	88	156	221	69	69	NA	NA	239	239	139	139	136	145	302	302	163	163	165	174	255	255	61	64	137	139	NA	NA	NA	NA	155	155	132	132
S13_P5b_22_1	P5b	NA	NA	116	131	121	125	183	183	NA	NA	155	155	NA	NA	87	97	217	217	NA	NA	147	147	236	239	NA	NA	136	139	302	302	NA	NA	168	171	NA	NA	61	64	NA	NA	167	181	NA	NA	NA	NA	128	128
S13_P5b_8_3	P5b	NA	NA	128	131	121	121	183	186	NA	NA	146	159	NA	NA	83	97	144	213	69	69	NA	NA	236	239	139	139	129	145	290	302	160	163	165	168	234	246	61	61	NA	NA	167	167	NA	NA	155	158	NA	NA
S13_P6b_1_1	P6b	NA	NA	128	128	125	125	180	183	NA	NA	151	159	NA	NA	87	97	199	199	69	69	147	171	233	239	139	142	129	136	302	302	160	174	165	165	249	249	61	64	138	140	167	181	214	219	145	155	132	135
S13_P6b_14_1	P6b	NA	NA	128	131	121	121	174	186	NA	NA	155	159	140	140	83	97	NA	NA	69	69	166	166	237	237	127	142	129	139	302	302	148	163	165	168	240	240	61	61	140	142	181	181	NA	NA	145	155	132	135
S13_P6b_21_4	P6b	NA	NA	128	128	121	125	183	183	220	220	146	159	129	146	88	93	214	214	69	69	154	166	NA	NA	133	142	129	139	290	302	163	174	165	171	240	246	64	64	140	140	181	181	NA	NA	150	161	132	135
S13_P6b_7_3	P6b	NA	NA	128	128	125	125	183	183	220	220	155	155	140	146	87	101	199	220	69	69	160	160	NA	NA	142	146	129	136	302	302	NA	NA	165	165	246	249	61	61	NA	NA	167	189	214	219	145	145	132	132
S13_P9b_29_2	P9b	NA	NA	131	131	122	122	177	183	217	220	157	159	140	146	82	97	134	134	69	69	NA	NA	238	238	142	142	129	129	290	290	163	163	165	174	243	249	61	61	NA	NA	NA	NA	NA	NA	NA	NA	NA	NA
S13_M7b_19_2	M7b	NA	NA	128	128	121	125	183	186	212	217	146	167	141	144	NA	NA	219	223	69	69	147	152	231	238	142	142	129	129	302	302	163	163	165	168	NA	NA	61	64	138	142	165	165	214	214	155	155	135	135
S13_P1a_35_4	P1a	NA	NA	131	131	129	129	183	186	220	220	159	159	143	143	87	87	214	214	69	73	152	152	240	240	136	136	129	150	302	302	163	163	165	165	252	255	61	61	137	137	171	171	219	219	156	158	122	122
S13_P9a_10_2	P9a	NA	NA	128	131	121	129	183	186	NA	NA	155	163	NA	NA	83	87	159	215	69	69	NA	NA	238	238	121	121	129	129	302	302	157	160	165	171	240	249	61	69	140	140	192	192	214	222	NA	NA	135	142
S13_P9a_11_2	P9a	NA	NA	128	128	129	129	183	186	NA	NA	163	167	136	138	83	87	153	218	52	52	150	159	237	239	142	142	129	129	302	302	163	163	165	171	NA	NA	61	64	141	141	188	188	214	214	155	155	NA	NA
S13_P9a_4_2	P9a	NA	NA	128	128	129	129	177	180	217	217	146	155	NA	NA	87	87	153	153	69	69	147	150	234	234	121	139	129	129	290	302	157	163	165	171	249	249	61	61	140	140	189	192	219	222	155	158	122	135
S13_P5b_1_4	P5b	NA	NA	128	131	121	121	183	186	NA	NA	155	163	NA	NA	83	83	144	144	69	69	NA	NA	239	239	139	139	136	150	302	302	163	174	159	168	240	243	64	64	137	137	167	181	214	217	NA	NA	135	135
S13_P5b_12_3	P5b	NA	NA	125	128	121	121	186	186	217	220	146	146	135	146	83	97	NA	NA	69	69	152	154	NA	NA	139	142	129	139	290	290	154	157	165	165	246	246	61	64	136	139	167	189	NA	NA	158	158	132	132
S13_P5b_13_3	P5b	NA	NA	116	128	121	121	174	186	NA	NA	155	163	NA	NA	83	97	212	217	69	69	NA	NA	NA	NA	139	139	129	129	290	302	157	157	165	165	246	255	64	64	138	138	167	189	NA	NA	155	158	132	142
S13_P5b_14_1	P5b	NA	NA	116	122	121	125	183	183	NA	NA	155	159	NA	NA	83	88	217	217	69	69	152	156	239	239	139	142	136	145	290	302	160	163	159	165	249	255	61	61	137	139	NA	NA	NA	NA	150	150	122	132
S13_P5b_14_3	P5b	NA	NA	125	128	125	125	183	183	188	223	146	159	137	137	83	101	221	221	69	69	147	153	236	239	139	139	136	150	302	302	163	169	159	162	243	255	61	64	137	137	167	189	211	217	150	155	132	132
S13_P5b_14_4	P5b	NA	NA	125	125	117	125	NA	NA	188	223	146	146	134	137	97	101	179	179	69	69	NA	NA	236	239	127	139	136	136	290	302	160	163	165	174	240	255	61	61	137	137	167	167	214	219	155	155	132	142
S13_P5b_32B_4	P5b	NA	NA	114	125	121	125	183	183	NA	NA	155	155	129	140	83	97	165	165	69	69	147	172	236	238	142	142	129	129	290	302	171	174	165	174	246	261	61	64	137	142	167	171	208	214	150	155	132	142
S13_P6b_14_4	P6b	NA	NA	128	131	121	125	183	186	NA	NA	146	151	140	140	83	97	215	220	NA	NA	NA	NA	232	239	127	139	129	136	290	302	163	174	165	165	243	249	61	61	140	142	167	181	214	219	155	155	NA	NA
S13_P6b_8_1	P6b	NA	NA	116	131	117	121	NA	NA	NA	NA	146	151	140	140	87	87	212	214	NA	NA	152	152	NA	NA	139	142	129	129	290	302	160	163	NA	NA	249	254	61	64	140	140	167	181	NA	NA	145	155	132	132
S13_P3b_31_4	P3b	NA	NA	116	128	125	129	NA	NA	NA	NA	NA	NA	144	146	93	93	214	222	69	69	152	152	NA	NA	142	142	129	129	302	302	157	157	165	180	240	249	61	64	138	144	167	173	NA	NA	145	150	132	135
S13_P9b_24_2	P9b	NA	NA	116	116	121	125	183	183	217	220	155	159	134	146	97	101	134	217	69	69	NA	NA	238	238	142	142	129	136	290	302	160	171	165	165	NA	NA	61	61	139	139	189	210	214	219	155	158	NA	NA
S13_M7b_26_4	M7b	NA	NA	125	128	121	125	171	183	217	217	146	151	134	140	NA	NA	217	217	69	69	NA	NA	238	238	138	142	129	129	NA	NA	163	163	168	171	243	255	61	73	NA	NA	165	185	214	219	155	155	132	135
S13_P9a_4_1	P9a	NA	NA	128	128	129	129	177	180	217	217	146	163	NA	NA	87	87	153	215	69	69	150	150	234	234	121	139	129	129	290	302	163	163	159	165	240	249	64	64	141	141	171	171	214	214	155	155	NA	NA
S13_P5b_1_1	P5b	NA	NA	128	131	121	121	186	186	NA	NA	151	155	134	137	97	97	214	214	73	78	147	153	236	236	133	142	136	139	302	302	160	174	165	168	240	243	61	64	137	137	167	167	NA	NA	155	155	132	132
S13_P5b_26_1	P5b	NA	NA	116	125	121	129	183	186	223	223	159	159	129	138	83	83	221	221	78	78	NA	NA	NA	NA	139	139	129	136	290	302	160	160	165	165	249	255	64	64	138	140	167	167	214	219	155	155	122	142
S13_P5b_26_3	P5b	NA	NA	111	114	121	121	183	186	NA	NA	146	155	145	145	79	87	220	220	69	69	160	172	232	232	139	139	136	150	290	290	160	163	165	165	246	255	64	64	137	140	167	192	NA	NA	NA	NA	NA	NA
S13_P5b_32_1	P5b	NA	NA	128	131	121	125	183	183	219	220	159	163	NA	NA	NA	NA	214	214	69	69	150	152	236	236	139	142	129	145	302	302	148	171	165	171	NA	NA	61	61	136	138	171	181	NA	NA	150	155	128	132
S13_P6b_13_2	P6b	NA	NA	122	128	117	121	180	183	220	220	159	172	140	140	83	88	214	220	69	78	NA	NA	NA	NA	127	142	129	139	302	302	148	160	168	171	240	255	61	61	134	137	167	181	214	214	155	155	132	142
S13_P6b_14_2	P6b	NA	NA	125	128	117	121	183	183	188	217	155	155	140	140	87	97	215	223	69	69	NA	NA	NA	NA	139	139	129	129	NA	NA	163	174	168	174	240	243	61	61	137	140	181	189	NA	NA	145	155	135	135
S13_P6b_19_2	P6b	NA	NA	116	128	121	129	183	183	189	220	146	159	141	146	NA	NA	215	215	69	69	145	160	236	238	133	146	129	150	290	302	163	174	165	165	243	246	61	61	140	140	167	189	208	214	145	155	132	135
S13_P6b_7_1	P6b	NA	NA	116	116	125	129	183	183	220	220	155	163	NA	NA	87	101	220	220	69	69	NA	NA	240	240	146	146	129	136	290	302	160	160	165	168	243	249	61	61	134	137	189	189	NA	NA	145	155	132	135
S13_P3b_16B_1	P3b	NA	NA	116	131	125	125	NA	NA	NA	NA	155	159	140	146	NA	NA	214	214	69	69	152	152	236	239	142	142	129	129	302	302	160	169	159	165	240	249	61	64	137	137	173	173	214	219	150	155	132	135
S13_M7b_11_2	M7b	NA	NA	114	122	NA	NA	183	186	217	220	146	159	126	126	86	101	NA	NA	69	69	NA	NA	236	238	138	142	129	150	302	302	154	166	165	171	NA	NA	61	64	140	142	171	171	214	219	NA	NA	132	135
S13_M7b_26A_2	M7b	NA	NA	114	128	125	125	NA	NA	217	217	151	167	136	136	NA	NA	214	217	69	69	152	152	238	238	138	142	129	150	302	302	163	163	NA	NA	243	249	61	61	140	140	NA	NA	NA	NA	145	155	NA	NA
S13_P9a_10_3	P9a	NA	NA	125	128	121	125	NA	NA	220	223	NA	NA	136	140	87	97	153	215	NA	NA	NA	NA	238	241	NA	NA	129	136	290	302	NA	NA	165	171	NA	NA	61	64	NA	NA	NA	NA	NA	NA	NA	NA	122	135
S13_P9a_42_4	P9a	NA	NA	128	131	121	129	186	186	197	217	163	167	129	140	83	97	159	209	73	73	150	150	236	238	121	142	129	129	NA	NA	157	157	165	165	249	252	61	64	137	140	NA	NA	214	214	145	158	NA	NA
S13_M6a_9_3	M6a	NA	NA	111	128	121	125	180	183	NA	NA	NA	NA	129	136	87	93	196	209	69	69	NA	NA	235	235	139	142	129	139	NA	NA	160	163	165	168	249	265	61	64	NA	NA	NA	NA	214	219	150	157	132	135
S13_P10a_28_2	P10a	NA	NA	114	128	125	125	NA	NA	NA	NA	151	167	136	136	NA	NA	214	217	69	69	NA	NA	238	238	138	142	129	150	302	302	NA	NA	NA	NA	NA	NA	61	61	NA	NA	NA	NA	NA	NA	145	155	NA	NA
S13_P2b_1_1	P2b	NA	NA	114	122	NA	NA	183	186	217	220	NA	NA	126	137	86	101	NA	NA	69	69	NA	NA	236	238	NA	NA	129	150	302	302	NA	NA	165	171	NA	NA	61	64	140	142	171	171	NA	NA	NA	NA	132	135
S13_P2b_21_2	P2b	NA	NA	119	131	121	125	183	183	209	220	156	159	132	132	NA	NA	NA	NA	69	69	NA	NA	NA	NA	139	139	129	129	290	302	NA	NA	NA	NA	NA	NA	61	64	NA	NA	171	171	214	219	155	155	NA	NA
S13_P5b_12_2	P5b	NA	NA	116	128	121	121	183	183	188	217	146	146	132	141	80	83	213	213	69	69	145	152	239	239	139	142	136	139	290	302	154	174	165	168	246	246	61	64	NA	NA	167	167	214	214	150	155	122	132
S13_P5b_19_1	P5b	NA	NA	128	131	125	125	183	183	188	217	155	155	137	137	97	97	223	223	69	73	147	152	NA	NA	142	142	129	129	NA	NA	160	160	162	174	243	255	61	64	136	141	167	171	214	217	155	158	132	142
S13_P6b_1_2	P6b	NA	NA	111	128	120	124	NA	NA	NA	NA	NA	NA	NA	NA	NA	NA	196	209	69	69	150	152	235	235	139	142	129	139	NA	NA	160	163	165	168	NA	NA	61	64	NA	NA	NA	NA	214	219	155	155	132	135
S13_P6b_31_2	P6b	NA	NA	125	128	NA	NA	NA	NA	220	223	NA	NA	136	140	87	97	153	215	69	69	NA	NA	238	241	NA	NA	NA	NA	290	302	NA	NA	165	171	NA	NA	NA	NA	137	140	NA	NA	203	208	145	155	NA	NA
S13_P6b_31_3	P6b	NA	NA	122	125	121	129	174	183	220	223	146	159	134	140	97	97	213	215	73	78	152	154	239	239	139	139	129	139	290	302	163	174	159	171	249	255	61	61	137	140	167	181	214	219	145	150	NA	NA
S13_P6b_8_2	P6b	NA	NA	131	131	125	125	183	183	188	220	146	155	129	141	97	97	212	214	69	78	152	156	237	240	127	139	129	139	302	302	148	163	165	165	246	249	61	64	140	142	167	167	208	214	NA	NA	121	121
S13_P6b_9_4	P6b	NA	NA	119	128	119	127	174	186	189	220	146	159	141	141	83	97	199	214	69	69	NA	NA	NA	NA	124	142	129	136	290	302	148	160	162	165	NA	NA	61	61	NA	NA	167	181	NA	NA	155	155	NA	NA
C13_P2b_34_2	P2b	NA	NA	131	131	125	125	183	183	209	220	168	168	126	129	NA	NA	214	223	69	69	164	164	238	238	NA	NA	129	145	302	302	163	163	165	165	240	255	64	64	138	140	171	171	214	214	145	157	135	135
C13_P2b_6B_4	P2b	NA	NA	119	119	121	129	183	183	NA	NA	NA	NA	126	126	97	97	209	223	69	69	147	164	238	238	NA	NA	129	150	290	302	NA	NA	165	165	NA	NA	64	64	136	136	167	189	214	226	NA	NA	132	132
C13_P5b_1A_4	P5b	NA	NA	131	131	121	121	171	186	NA	NA	155	155	137	137	78	97	215	215	NA	NA	147	152	236	236	133	139	129	139	302	302	148	174	165	168	240	246	61	64	137	140	167	181	208	219	145	145	132	132
C13_P5b_23_2	P5b	NA	NA	128	131	121	129	186	186	188	188	NA	NA	141	141	83	97	214	220	69	78	NA	NA	236	236	NA	NA	129	129	302	302	163	163	165	165	246	249	NA	NA	137	139	167	170	NA	NA	158	158	132	132
C13_P5b_32_2	P5b	NA	NA	125	128	125	129	183	183	189	223	155	159	129	140	83	97	165	214	69	69	152	172	236	238	142	142	129	129	290	302	154	157	165	171	249	261	61	64	139	142	167	171	219	226	150	155	132	132
C13_P6b_1_4	P6b	NA	NA	122	128	121	125	180	183	220	220	151	159	137	145	97	97	215	215	69	69	176	176	NA	NA	NA	NA	129	129	290	290	160	174	165	165	240	246	61	64	140	142	181	188	214	214	NA	NA	NA	NA
C13_P6b_3_3	P6b	NA	NA	111	131	121	121	183	186	188	220	159	159	NA	NA	83	97	215	215	69	73	147	166	239	239	NA	NA	129	136	290	302	160	169	159	165	NA	NA	61	61	137	142	167	192	208	214	155	155	132	142
S13_P10a_11_3	P10a	NA	NA	128	131	121	121	177	180	223	226	NA	NA	129	129	87	87	NA	NA	69	73	145	152	236	238	NA	NA	129	129	302	302	160	163	162	165	240	255	61	61	137	137	170	170	208	219	145	158	132	135
S13_P5b_8_2	P5b	NA	NA	128	131	121	121	183	186	217	223	NA	NA	137	141	83	97	221	221	69	69	147	147	NA	NA	NA	NA	129	145	302	302	160	163	165	168	240	249	61	61	136	139	167	167	214	226	158	158	132	135
S13_P3b_14_2	P3b	NA	NA	111	122	125	125	183	186	217	217	NA	NA	136	136	87	91	209	214	69	69	160	160	238	238	NA	NA	129	129	302	302	163	163	171	171	249	249	61	61	142	142	167	167	208	234	150	155	135	135
C13_P9b_13_2	P9b	NA	NA	131	131	121	125	183	186	209	217	159	159	140	140	82	97	214	217	69	69	150	150	236	236	NA	NA	129	129	290	302	157	171	165	165	NA	NA	64	64	NA	NA	210	210	214	219	NA	NA	132	132
C13_P9b_29_1	P9b	NA	NA	128	131	121	121	183	183	220	223	NA	NA	NA	NA	80	87	134	134	69	69	172	172	238	238	142	142	129	150	290	302	157	163	159	174	NA	NA	NA	NA	138	138	167	171	214	219	150	156	132	132
C13_P9a_42_4	P9a	NA	NA	128	131	122	131	NA	NA	217	217	NA	NA	129	129	83	83	159	220	69	73	150	150	238	238	142	142	129	129	290	302	157	157	159	165	NA	NA	61	64	NA	NA	171	171	214	214	145	155	NA	NA
C13_M6a_14_2	M6a	NA	NA	128	128	125	125	186	186	197	197	146	146	129	137	95	95	196	213	69	69	172	172	238	238	142	142	139	139	302	302	163	163	165	165	249	255	64	64	138	139	194	194	219	226	150	155	135	135
C13_P2b_21_3	P2b	NA	NA	131	131	121	121	183	183	220	220	156	159	132	141	97	101	209	212	NA	NA	147	152	238	238	139	146	129	129	290	302	171	171	159	165	NA	NA	64	64	NA	NA	167	167	214	214	150	157	135	135
C13_P6b_14_1	P6b	NA	NA	116	128	122	122	183	183	NA	NA	155	155	NA	NA	87	97	212	215	NA	NA	162	166	237	239	133	133	129	129	290	302	163	174	165	171	240	249	61	61	NA	NA	167	181	208	214	145	155	132	135
C13_P6b_7_2	P6b	NA	NA	119	128	127	131	183	183	220	220	NA	NA	146	146	97	101	199	220	69	69	160	172	NA	NA	139	146	129	139	290	302	160	163	165	165	NA	NA	NA	NA	NA	NA	167	189	208	214	145	155	NA	NA
C13_M7b_6_1	M7b	NA	NA	128	128	125	125	171	186	212	217	NA	NA	136	140	86	86	196	213	69	69	182	182	NA	NA	121	142	129	129	290	302	163	163	168	168	243	243	61	61	140	142	185	189	214	214	155	157	132	135
C13_P9a_10_1	P9a	NA	NA	128	131	121	121	183	183	215	217	NA	NA	145	145	83	87	159	159	69	73	150	159	NA	NA	121	139	129	129	302	302	NA	NA	171	171	249	249	64	64	137	141	189	189	222	222	155	158	122	135
C13_P9a_38_1	P9a	NA	NA	128	128	121	129	180	183	220	223	147	155	136	138	83	87	153	159	52	52	150	150	236	236	121	139	129	129	290	290	157	163	165	165	249	249	61	64	140	140	189	189	208	222	145	158	132	132
C13_M6a_14_3	M6a	NA	NA	128	128	121	125	186	186	197	220	167	167	129	137	95	95	213	213	52	69	145	172	238	238	NA	NA	129	139	302	302	163	166	165	165	249	249	64	64	138	139	189	189	219	226	150	150	132	135
C13_M8a_31_1	M8a	NA	NA	128	128	125	125	NA	NA	NA	NA	146	157	134	146	87	95	223	223	69	69	156	168	234	234	130	139	129	139	302	302	160	160	165	168	249	249	61	64	NA	NA	185	194	219	219	150	155	132	132
C13_P2b_21_1	P2b	NA	NA	119	131	125	129	183	183	NA	NA	159	163	132	140	101	101	NA	NA	69	69	147	147	238	238	NA	NA	129	129	290	302	171	171	159	165	246	255	64	64	138	138	167	167	214	219	150	157	135	135
C13_P5b_22_3	P5b	NA	NA	125	131	121	125	183	183	220	220	155	163	132	137	97	97	209	214	69	69	147	147	236	236	139	142	129	136	290	302	163	163	165	165	255	261	61	64	139	144	167	171	214	214	145	145	132	135
C13_P5b_23_1	P5b	NA	NA	114	114	121	129	183	183	188	223	155	155	141	141	83	87	214	223	69	69	166	170	NA	NA	142	142	129	136	290	290	163	174	165	171	246	249	NA	NA	136	139	167	171	214	219	145	158	132	142
C13_P6b_1_3	P6b	NA	NA	128	128	121	121	180	183	189	220	159	159	129	141	87	97	NA	NA	69	73	147	171	239	239	NA	NA	129	145	290	290	NA	NA	165	165	240	249	NA	NA	137	137	167	185	214	219	155	155	135	135
C13_P6b_13_3	P6b	NA	NA	128	128	121	121	183	183	188	220	146	155	134	145	83	97	214	223	69	69	147	156	232	240	NA	NA	129	129	290	302	160	160	168	168	249	251	61	61	NA	NA	167	167	NA	NA	145	155	132	135
C13_P6b_21_1	P6b	NA	NA	111	128	121	129	NA	NA	212	220	159	159	129	141	93	97	185	185	69	69	150	166	238	240	NA	NA	136	139	302	302	160	163	164	168	240	255	64	64	NA	NA	181	181	214	214	145	150	132	132
C13_P6b_7_1	P6b	NA	NA	122	128	121	125	171	183	197	220	146	159	146	146	72	87	220	220	69	69	152	160	237	237	142	146	129	136	290	302	160	160	165	165	246	249	61	61	137	140	167	167	214	219	145	145	132	132
C13_P6b_7_3	P6b	NA	NA	116	125	125	129	183	183	NA	NA	146	146	145	145	87	97	214	220	69	73	145	160	NA	NA	NA	NA	136	136	290	302	160	160	165	168	240	249	61	61	136	141	167	167	214	219	145	145	132	132
C13_P2b_12_2	P2b	NA	NA	114	131	125	129	183	183	217	220	155	159	132	141	97	101	156	223	69	69	147	155	238	238	139	139	129	150	290	302	163	163	165	165	246	255	NA	NA	136	144	189	192	214	214	145	157	135	135
C13_P5b_19_4	P5b	NA	NA	116	128	121	121	183	186	220	223	NA	NA	NA	NA	97	97	223	223	69	78	147	150	236	236	139	142	136	136	290	302	148	160	162	164	NA	NA	61	64	139	141	171	171	214	214	150	155	132	135
C13_P5b_23_3	P5b	NA	NA	125	128	125	129	NA	NA	188	220	155	155	134	141	83	83	220	220	69	69	147	166	NA	NA	103	142	129	150	290	302	160	163	165	165	243	246	61	61	137	139	167	167	214	219	145	145	132	135
C13_P5b_8_4	P5b	NA	NA	125	131	121	121	183	186	217	220	146	159	132	141	83	97	217	217	69	78	145	156	239	239	NA	NA	139	145	302	302	163	163	165	165	240	246	61	61	NA	NA	171	181	214	226	145	161	NA	NA
C13_P6b_31_3	P6b	NA	NA	111	125	121	125	180	180	189	220	159	163	134	140	93	97	214	214	NA	NA	147	152	NA	NA	139	142	129	139	290	290	157	163	165	171	249	249	69	69	NA	NA	181	192	NA	NA	150	155	132	132
C13_P6b_8_1	P6b	NA	NA	128	128	125	125	174	183	NA	NA	NA	NA	129	129	83	87	214	220	69	69	152	152	238	240	139	142	129	139	290	302	NA	NA	165	165	234	246	61	61	140	142	167	167	208	211	145	145	135	135
C13_P6b_8_4	P6b	NA	NA	122	131	117	121	174	183	209	220	NA	NA	NA	NA	83	97	214	223	69	78	NA	NA	238	240	139	142	NA	NA	290	302	148	163	NA	NA	240	249	NA	NA	NA	NA	167	181	NA	NA	145	155	NA	NA
C13_P6b_9_2	P6b	NA	NA	131	131	121	125	183	186	220	220	159	159	NA	NA	83	87	199	223	52	52	152	160	241	241	139	142	136	139	290	302	148	163	165	168	249	249	61	61	NA	NA	167	192	208	219	145	155	132	135
C13_P3b_14_1	P3b	NA	NA	116	122	125	125	NA	NA	NA	NA	155	155	134	146	87	97	214	219	69	69	156	156	238	238	139	142	129	129	302	302	163	169	165	165	NA	NA	61	64	138	142	173	173	214	234	145	150	132	135
C13_M7b_26_1	M7b	NA	NA	128	128	121	125	183	186	NA	NA	NA	NA	NA	NA	86	97	217	217	69	69	NA	NA	232	238	136	139	129	145	302	302	NA	NA	165	168	243	255	NA	NA	137	140	185	185	214	219	155	158	132	135
C13_P5b_1_2	P5b	NA	NA	119	131	121	125	183	186	188	223	155	155	134	140	83	97	218	218	73	73	152	172	236	236	142	142	139	145	302	302	NA	NA	NA	NA	240	243	61	64	137	140	171	181	214	219	145	145	132	135
C13_P5b_12_4	P5b	NA	NA	116	125	121	125	183	186	188	188	146	159	NA	NA	NA	NA	217	217	69	78	152	152	NA	NA	139	142	136	136	290	302	154	169	NA	NA	246	249	61	64	NA	NA	167	167	NA	NA	150	158	132	132
C14_P5b_5_3	P5b	NA	NA	122	128	121	129	186	186	217	223	NA	NA	132	145	97	97	214	221	69	69	152	152	NA	NA	139	142	129	136	290	290	157	163	165	165	246	251	61	61	NA	NA	167	167	211	222	NA	NA	128	128
C14_M7b_11_2	M7b	NA	NA	128	128	122	127	186	186	217	217	151	151	134	134	86	93	196	196	69	69	147	156	238	238	NA	NA	129	129	302	302	163	171	NA	NA	237	243	NA	NA	NA	NA	185	189	214	219	155	155	122	135
C14_P5b_13_2	P5b	NA	NA	114	116	121	121	180	183	220	223	155	155	140	145	83	97	214	214	69	69	150	152	239	239	139	142	129	145	302	302	NA	NA	NA	NA	246	246	64	64	138	139	NA	NA	214	214	145	145	122	122
C14_P5b_15_2	P5b	NA	NA	114	128	121	125	183	183	188	223	159	163	139	139	83	83	214	220	69	69	150	155	NA	NA	138	138	129	129	290	302	NA	NA	165	168	240	249	61	61	137	139	167	167	214	219	150	150	135	138
S14_P6b_14_3	P6b	NA	NA	128	131	117	121	183	183	189	189	151	159	140	140	97	97	213	215	69	69	NA	NA	232	232	127	139	139	139	302	302	163	163	165	168	240	249	61	61	137	137	167	181	NA	NA	145	145	132	135
S14_M7b_19_3	M7b	NA	NA	128	128	125	125	174	183	217	217	146	146	141	144	NA	NA	219	219	69	69	NA	NA	238	238	142	142	129	129	302	302	NA	NA	165	165	243	249	61	61	140	142	192	192	214	217	155	155	132	135
S14_P1a_18_1	P1a	NA	NA	131	131	129	129	183	183	220	223	155	159	129	129	87	87	214	217	73	78	152	152	240	240	136	136	129	129	302	302	163	163	174	174	252	255	61	64	137	137	189	189	NA	NA	NA	NA	128	135
S14_M8a_30_1	M8a	NA	NA	116	128	127	127	180	180	220	220	146	157	134	137	80	87	213	223	69	69	NA	NA	237	237	142	155	139	139	302	302	160	160	NA	NA	249	249	61	64	139	141	194	194	219	219	150	155	NA	NA
S14_P5b_1_1	P5b	NA	NA	114	131	121	121	183	186	NA	NA	146	155	134	134	88	97	218	218	69	69	147	172	237	239	127	142	145	150	302	302	NA	NA	NA	NA	246	251	64	64	137	137	167	181	NA	NA	145	164	132	132
S14_P5b_12_1	P5b	NA	NA	125	128	125	125	183	186	188	188	146	155	141	141	NA	NA	221	221	78	78	NA	NA	239	239	142	142	136	136	290	302	NA	NA	165	168	243	246	61	64	136	138	167	167	214	214	150	158	132	132
S14_P5b_13_2	P5b	NA	NA	122	128	121	129	180	183	220	223	146	146	NA	NA	97	97	214	217	69	69	147	147	233	238	142	142	129	136	290	302	157	157	165	165	246	251	61	64	138	138	171	189	208	214	145	155	132	132
S14_P5b_13_3	P5b	NA	NA	116	131	121	125	171	186	217	220	155	155	133	145	87	97	214	214	69	69	152	152	233	237	139	142	129	129	302	302	157	160	NA	NA	255	255	61	64	138	140	167	167	NA	NA	150	150	132	142
S14_P5b_23_1	P5b	NA	NA	114	116	129	129	183	186	188	220	155	155	NA	NA	83	97	214	214	69	69	154	166	236	238	121	146	129	129	290	290	163	163	NA	NA	243	246	NA	NA	139	142	167	171	NA	NA	145	150	128	132
S14_P5b_32_2	P5b	NA	NA	125	128	125	125	183	183	188	220	155	155	132	140	87	97	165	165	69	69	152	152	238	238	139	142	129	136	302	302	160	163	165	165	243	249	61	61	136	136	167	171	NA	NA	155	155	135	142
S14_P6b_14_2	P6b	NA	NA	116	131	117	121	183	183	188	217	146	151	140	140	83	97	214	214	73	73	150	150	237	237	127	139	129	145	302	302	163	174	165	165	249	249	61	61	137	142	167	174	219	219	155	155	132	135
S14_P6b_17_1	P6b	NA	NA	122	128	121	129	174	186	NA	NA	146	155	129	141	97	97	144	220	69	73	145	147	NA	NA	127	142	129	139	302	302	174	174	159	168	NA	NA	61	64	137	140	189	192	NA	NA	145	145	125	135
C14_P1a_9_1	P1a	NA	NA	131	131	NA	NA	183	183	220	220	159	159	129	143	87	87	214	217	NA	NA	152	152	237	237	136	136	NA	NA	302	302	157	163	159	159	NA	NA	61	76	NA	NA	189	189	219	228	156	156	122	128
C14_P9a_40_4	P9a	NA	NA	128	128	NA	NA	NA	NA	217	220	146	155	136	136	80	87	165	220	73	73	150	159	236	238	139	142	129	129	290	302	157	163	159	174	249	249	NA	NA	NA	NA	171	189	214	214	155	158	122	122
C14_P10a_22_3	P10a	NA	NA	131	131	NA	NA	180	180	NA	NA	146	155	129	129	87	87	NA	NA	73	73	147	152	236	238	136	139	129	129	290	302	160	163	162	174	243	255	61	64	139	139	171	171	214	214	155	155	132	135
C14_P5b_1_1	P5b	NA	NA	114	128	NA	NA	183	186	220	223	155	159	135	137	83	83	156	156	69	69	145	147	236	236	139	142	129	139	302	302	160	174	165	171	243	249	61	61	NA	NA	167	192	NA	NA	NA	NA	132	132
C14_P5b_1_4	P5b	NA	NA	128	131	NA	NA	186	186	223	223	146	155	137	146	83	83	218	218	69	69	147	147	236	238	139	142	136	139	302	302	163	174	165	168	243	249	61	61	NA	NA	167	192	214	219	150	155	NA	NA
C14_P5b_32_2	P5b	NA	NA	122	125	NA	NA	183	183	NA	NA	146	159	140	140	83	83	214	217	69	69	147	172	238	238	139	142	129	136	290	302	154	157	165	165	246	249	61	61	NA	NA	167	171	214	226	145	155	132	132
C14_P6b_16_4	P6b	NA	NA	114	131	NA	NA	183	186	220	220	159	159	134	141	88	93	214	214	78	78	147	160	236	238	142	142	129	136	290	302	160	163	165	165	234	246	NA	NA	142	142	167	167	NA	NA	155	155	132	135
C14_P6b_8_2	P6b	NA	NA	128	128	NA	NA	183	183	189	189	146	177	129	140	87	97	NA	NA	69	69	152	172	NA	NA	124	146	129	150	302	302	154	163	165	165	246	246	64	64	NA	NA	167	167	NA	NA	NA	NA	132	132
C14_P6b_9_4	P6b	NA	NA	131	131	NA	NA	183	186	189	220	146	159	NA	NA	83	97	199	199	NA	NA	145	152	236	238	127	142	129	136	302	302	163	163	162	168	NA	NA	61	61	NA	NA	167	181	214	219	145	155	132	135
S14_M7b_3_4	M7b	NA	NA	122	128	NA	NA	183	186	217	217	146	159	134	134	83	97	214	214	73	78	152	152	236	238	139	142	NA	NA	290	302	148	163	165	165	243	246	61	61	NA	NA	167	167	214	219	145	155	NA	NA
S14_P5b_15_1	P5b	NA	NA	128	128	NA	NA	183	183	220	223	146	146	139	145	83	101	199	220	69	69	150	152	NA	NA	139	142	145	150	290	302	160	163	165	168	240	255	61	61	NA	NA	167	167	NA	NA	150	157	132	132
S14_P5b_32_1	P5b	NA	NA	122	131	NA	NA	183	183	189	220	155	159	133	140	87	97	214	214	69	69	152	152	NA	NA	139	139	129	139	290	302	NA	NA	165	171	NA	NA	NA	NA	NA	NA	171	171	NA	NA	150	155	132	132
S14_P5b_5_3	P5b	NA	NA	116	131	NA	NA	183	186	220	223	146	155	133	146	80	97	221	221	69	78	152	152	NA	NA	139	142	136	139	290	290	157	157	159	165	249	251	61	64	NA	NA	167	167	211	214	145	145	NA	NA
S14_P6b_26_1	P6b	NA	NA	114	125	NA	NA	NA	NA	188	220	146	159	145	145	97	97	223	223	69	69	152	166	NA	NA	127	142	129	129	290	302	160	160	NA	NA	240	251	64	64	NA	NA	167	181	NA	NA	NA	NA	132	132
C14_M7b_19_1	M7b	NA	NA	128	128	NA	NA	183	183	217	217	146	146	131	134	86	86	195	219	69	69	147	152	238	238	136	142	129	145	302	302	163	171	165	165	243	249	61	64	NA	NA	189	189	214	219	155	155	135	135
C14_M7b_7_3	M7b	NA	NA	128	128	NA	NA	186	186	212	217	151	167	131	144	86	86	196	223	69	69	172	182	231	238	142	146	129	129	302	302	163	171	165	171	251	255	61	61	NA	NA	167	185	214	219	155	155	132	135
C14_P9a_20_1	P9a	NA	NA	128	128	NA	NA	177	177	220	220	155	155	140	140	87	87	215	215	69	69	147	159	NA	NA	121	121	129	129	302	302	157	157	165	165	249	252	61	61	NA	NA	188	188	219	219	NA	NA	128	135
C14_P9a_4_1	P9a	NA	NA	128	128	NA	NA	177	186	215	217	146	146	NA	NA	87	87	153	209	69	69	150	159	NA	NA	121	136	129	129	302	302	157	157	159	165	240	249	61	64	NA	NA	167	192	214	214	158	158	122	135
C14_P10a_22_1	P10a	NA	NA	131	131	NA	NA	177	180	220	223	146	155	129	129	87	87	NA	NA	73	73	147	147	NA	NA	139	139	129	129	302	302	163	163	NA	NA	255	255	61	64	NA	NA	198	198	NA	NA	NA	NA	135	142
C14_M8a_30_3	M8a	NA	NA	111	128	NA	NA	171	177	220	220	146	146	137	137	87	87	141	153	69	69	147	156	232	237	121	130	129	139	302	302	160	163	165	168	249	249	61	61	NA	NA	189	194	219	219	NA	NA	132	132
C14_P2b_21_1	P2b	NA	NA	119	131	NA	NA	183	186	220	220	159	163	129	132	97	101	209	209	73	73	145	147	236	238	NA	NA	129	145	290	302	171	171	165	165	243	255	61	64	NA	NA	171	171	214	219	NA	NA	132	135
C14_P5b_1_3	P5b	NA	NA	128	131	NA	NA	186	186	188	217	155	159	137	137	83	87	NA	NA	73	73	147	172	235	239	142	142	139	150	302	302	NA	NA	165	168	240	246	61	61	NA	NA	167	167	208	219	NA	NA	128	132
C14_P5b_13_3	P5b	NA	NA	125	128	NA	NA	180	186	188	220	155	155	133	140	87	97	165	214	69	69	147	150	238	238	139	139	129	129	302	302	148	157	165	165	246	255	64	64	NA	NA	167	189	214	214	155	155	132	132
C14_P5b_23_3	P5b	NA	NA	116	128	NA	NA	183	186	188	223	155	155	140	140	87	97	214	214	78	78	162	172	236	238	142	142	129	139	290	302	163	174	NA	NA	246	249	61	61	NA	NA	167	170	214	214	155	158	132	132
C14_P6b_16_3	P6b	NA	NA	131	131	NA	NA	180	183	188	220	146	155	134	140	88	97	223	223	69	69	150	160	NA	NA	124	142	129	129	290	302	NA	NA	165	165	246	246	61	61	NA	NA	167	167	219	219	145	155	132	135
C14_P3b_17_3	P3b	NA	NA	116	131	NA	NA	186	186	217	217	155	159	140	140	87	93	214	214	69	78	147	152	236	240	142	142	134	134	302	302	163	169	NA	NA	NA	NA	61	61	NA	NA	185	185	219	234	155	155	132	135
S14_M7b_5_4	M7b	NA	NA	128	128	NA	NA	174	183	217	217	146	151	137	140	86	97	213	213	69	69	152	152	238	238	138	138	129	129	302	302	166	166	165	171	243	246	61	61	NA	NA	NA	NA	214	219	155	155	135	135
S14_P5b_1_4	P5b	NA	NA	114	131	NA	NA	183	186	188	217	155	155	134	134	83	97	165	165	69	69	147	172	235	239	139	142	129	150	302	302	174	174	162	165	246	261	61	61	NA	NA	167	181	NA	NA	150	155	135	142
S14_P5b_23_3	P5b	NA	NA	116	128	NA	NA	183	183	188	188	155	155	129	137	83	83	170	214	69	69	154	172	NA	NA	139	146	129	136	302	302	160	163	162	162	246	249	61	61	NA	NA	167	170	214	219	145	145	132	135
S14_P6b_1_4	P6b	NA	NA	128	128	NA	NA	180	183	220	220	159	170	NA	NA	97	97	215	215	78	78	171	176	237	239	124	139	129	129	290	302	NA	NA	165	165	249	249	61	64	NA	NA	185	185	214	214	145	145	135	142
S14_P6b_26_3	P6b	NA	NA	131	131	NA	NA	183	186	220	223	159	172	NA	NA	97	101	223	223	69	69	150	166	240	240	127	139	129	136	302	302	NA	NA	NA	NA	246	251	61	64	NA	NA	171	181	NA	NA	NA	NA	132	132
C14_P1a_7_4	P1a	NA	NA	128	131	121	121	183	183	220	220	159	159	129	129	87	87	214	217	73	73	152	152	NA	NA	136	136	129	150	302	302	157	163	159	159	252	255	NA	NA	137	137	189	189	219	219	156	156	122	122
C14_M6a_9_2	M6a	NA	NA	111	128	125	125	183	183	220	226	146	163	134	137	NA	NA	196	213	69	69	145	164	235	235	139	142	129	139	302	302	160	163	165	168	249	255	61	61	138	142	189	189	214	226	NA	NA	132	135
C14_P10a_21_2	P10a	NA	NA	128	128	121	121	183	183	223	223	146	170	NA	NA	NA	NA	NA	NA	73	73	NA	NA	236	236	139	139	NA	NA	302	302	160	163	NA	NA	249	249	61	61	137	137	189	210	NA	NA	145	145	135	135
C14_P2b_11_4	P2b	NA	NA	119	119	121	129	183	183	188	209	159	159	139	141	NA	NA	211	220	69	69	147	152	236	236	139	142	NA	NA	290	290	151	151	165	165	246	255	64	64	136	136	167	171	NA	NA	145	145	NA	NA
C14_P5b_1_2	P5b	NA	NA	114	128	121	129	186	186	188	223	155	159	NA	NA	NA	NA	218	218	69	69	147	172	236	239	139	142	139	139	302	302	174	174	165	168	243	243	64	64	137	137	167	181	NA	NA	145	155	132	135
C14_P5b_23_2	P5b	NA	NA	128	128	129	129	183	186	223	223	151	155	137	140	NA	NA	214	217	78	78	147	166	236	236	139	142	NA	NA	290	302	174	174	165	174	246	249	61	61	137	137	167	167	NA	NA	145	145	132	135
C14_P6b_11_2	P6b	NA	NA	122	131	121	121	171	183	189	189	151	159	129	137	NA	NA	199	215	69	73	160	160	NA	NA	124	124	129	139	290	302	163	174	168	174	249	249	NA	NA	138	140	167	189	208	219	158	158	132	135
S14_P9b_28_3	P9b	NA	NA	128	131	121	121	183	183	217	223	155	159	NA	NA	NA	NA	NA	NA	69	69	152	172	238	238	142	142	129	129	290	302	163	163	159	162	251	255	61	61	138	138	171	192	214	219	155	155	132	135
S14_M7b_22_4	M7b	NA	NA	128	131	121	121	171	174	217	217	146	155	136	136	NA	NA	196	196	69	69	147	182	238	238	NA	NA	129	139	302	302	160	166	165	165	243	243	64	64	140	142	192	192	NA	NA	155	155	122	132
S14_P9a_43_1	P9a	NA	NA	128	128	121	121	183	183	197	217	155	155	NA	NA	NA	NA	214	220	73	73	150	150	238	238	136	142	129	129	302	302	157	157	159	159	240	249	61	61	137	137	189	189	NA	NA	145	155	NA	NA
S14_P10a_2_4	P10a	NA	NA	128	128	121	121	180	180	223	223	155	159	137	137	NA	NA	214	214	73	73	147	147	236	236	121	121	129	129	302	302	160	163	177	177	249	255	61	64	137	137	171	189	219	231	145	145	132	132
S14_P10a_39_3	P10a	NA	NA	114	114	121	121	177	177	220	223	146	171	NA	NA	NA	NA	214	214	69	73	147	147	236	236	NA	NA	129	129	302	302	163	163	162	171	243	243	61	64	137	139	198	198	NA	NA	145	145	122	122
S14_P2b_11_3	P2b	NA	NA	119	119	129	129	183	183	209	220	159	159	141	141	NA	NA	156	220	69	69	147	147	236	238	142	142	129	129	290	302	151	163	165	165	255	255	61	64	136	136	167	189	NA	NA	NA	NA	132	132
S14_P5b_8_3	P5b	NA	NA	131	131	121	125	183	186	217	217	146	146	132	141	NA	NA	141	221	69	69	147	156	236	236	139	146	NA	NA	290	302	163	163	165	168	234	240	64	64	136	136	167	171	NA	NA	NA	NA	122	122
S14_P3b_15_4	P3b	NA	NA	116	128	121	125	183	186	217	220	155	159	NA	NA	NA	NA	214	214	69	69	156	156	238	240	139	139	129	129	302	302	157	163	171	171	249	249	64	64	137	144	167	173	234	234	155	155	135	135
S14_P3b_28_1	P3b	NA	NA	116	116	121	125	183	183	217	217	NA	NA	NA	NA	91	97	156	214	78	78	147	156	240	240	139	142	129	129	302	302	157	157	NA	NA	249	249	64	64	137	137	173	173	NA	NA	150	155	132	132
C14_P9b_13_4	P9b	NA	NA	128	131	121	121	186	186	217	217	157	159	NA	NA	NA	NA	191	211	NA	NA	152	172	236	236	142	142	129	129	290	302	157	171	158	165	243	249	61	64	140	140	173	189	214	219	NA	NA	122	135
C14_P9b_16_1	P9b	NA	NA	131	131	121	121	183	186	220	223	155	159	NA	NA	82	82	NA	NA	69	69	152	166	238	238	121	121	129	136	290	302	157	163	158	165	246	252	61	61	137	140	189	210	214	219	150	158	128	135
C14_M7b_3_4	M7b	NA	NA	128	128	125	125	171	183	217	217	146	155	NA	NA	NA	NA	196	214	69	69	NA	NA	238	238	136	139	129	129	290	302	160	171	165	168	243	243	61	76	140	142	185	210	214	219	NA	NA	NA	NA
C14_M7b_5_1	M7b	NA	NA	116	116	125	125	171	183	188	217	NA	NA	NA	NA	NA	NA	215	219	69	69	156	160	239	239	139	142	129	129	302	302	NA	NA	165	165	243	243	NA	NA	137	144	173	173	219	234	150	150	135	135
C14_P9a_10_1	P9a	NA	NA	128	131	121	121	186	186	217	220	159	163	NA	NA	NA	NA	159	215	69	69	137	150	238	238	121	139	129	129	NA	NA	157	160	165	171	240	249	61	64	141	141	189	189	222	222	145	155	132	135
C14_M6a_14_1	M6a	NA	NA	128	128	121	121	186	186	197	197	NA	NA	129	137	NA	NA	196	213	69	69	145	172	238	238	142	142	139	139	302	302	NA	NA	165	165	255	255	61	64	138	139	194	194	219	226	155	155	132	135
C14_P10a_21_4	P10a	NA	NA	128	128	121	121	177	180	217	223	146	159	NA	NA	NA	NA	214	214	69	73	147	147	236	236	139	142	129	129	302	302	160	160	NA	NA	249	249	61	61	137	142	174	189	214	219	NA	NA	132	142
C14_P10a_43_1	P10a	NA	NA	128	131	121	121	177	180	220	223	159	166	NA	NA	NA	NA	213	213	69	73	145	147	NA	NA	121	139	129	129	302	302	160	163	162	162	255	255	61	61	137	137	171	198	214	219	NA	NA	NA	NA
C14_M8a_1_4	M8a	NA	NA	116	128	125	125	174	183	217	220	146	157	134	140	95	95	213	223	69	69	159	168	238	243	121	133	NA	NA	302	302	160	163	168	168	243	249	61	61	138	138	194	194	214	231	145	155	NA	NA
C14_M8a_11_4	M8a	NA	NA	128	131	121	125	186	186	217	217	146	146	137	137	NA	NA	NA	NA	69	69	145	152	NA	NA	133	138	129	129	302	302	163	163	168	168	243	243	NA	NA	140	142	189	189	214	231	115	157	NA	NA
C14_M8a_8_4	M8a	NA	NA	111	131	125	125	183	183	217	220	146	146	NA	NA	NA	NA	213	223	69	69	NA	NA	237	237	138	142	129	129	302	302	163	163	165	168	249	249	64	64	140	142	194	194	214	217	NA	NA	NA	NA
C14_P5b_26_4	P5b	NA	NA	114	125	121	125	183	183	220	223	146	155	NA	NA	83	97	213	214	69	78	NA	NA	236	236	139	139	NA	NA	290	302	160	163	165	165	255	255	NA	NA	138	140	167	167	NA	NA	NA	NA	NA	NA
C14_P6b_26_4	P6b	NA	NA	114	131	121	129	180	183	188	220	151	159	NA	NA	NA	NA	199	213	69	69	147	166	NA	NA	NA	NA	129	129	302	302	160	163	164	171	NA	NA	NA	NA	137	137	167	181	214	219	155	155	NA	NA
C14_P3b_15_4	P3b	NA	NA	116	116	121	129	183	186	217	223	156	159	NA	NA	NA	NA	NA	NA	69	69	156	160	NA	NA	139	142	NA	NA	302	302	157	157	NA	NA	249	249	61	64	137	144	NA	NA	234	234	155	155	NA	NA
C14_P3b_16_2	P3b	NA	NA	116	131	121	125	183	186	188	220	155	155	NA	NA	NA	NA	215	215	69	69	152	156	NA	NA	139	142	129	129	302	302	157	157	165	165	240	243	NA	NA	138	138	173	192	214	219	150	155	NA	NA
S14_M7b_11_4	M7b	NA	NA	122	128	125	125	171	183	217	217	146	151	NA	NA	NA	NA	213	213	69	69	152	156	238	238	136	138	129	145	NA	NA	163	166	165	165	243	251	NA	NA	138	138	189	189	219	219	155	155	NA	NA
S14_M7b_22_2	M7b	NA	NA	128	131	125	125	183	183	217	220	151	163	132	134	NA	NA	217	217	69	69	NA	NA	NA	NA	127	139	129	136	302	302	154	163	165	165	240	246	61	64	NA	NA	167	167	214	219	145	145	128	135
S14_M7b_22_3	M7b	NA	NA	128	128	121	125	171	186	217	217	146	151	136	136	NA	NA	213	213	69	69	147	152	NA	NA	136	139	129	129	302	302	163	166	165	165	243	249	61	64	NA	NA	185	185	217	219	NA	NA	132	135
S14_M7b_6_1	M7b	NA	NA	128	131	121	125	183	186	217	217	155	171	NA	NA	NA	NA	196	223	69	69	182	182	238	238	121	138	129	129	302	302	160	163	165	168	243	249	61	61	137	139	185	189	214	244	158	158	132	132
S14_P1a_13_4	P1a	NA	NA	128	128	121	121	183	183	220	220	155	159	NA	NA	NA	NA	214	214	69	78	152	152	238	240	139	139	129	129	302	302	163	163	165	174	255	255	61	61	137	137	189	189	219	219	NA	NA	122	128
S14_P9a_30_1	P9a	NA	NA	128	128	121	129	183	186	220	226	163	163	141	154	NA	NA	215	215	NA	NA	NA	NA	236	238	136	139	129	129	290	302	157	157	159	165	240	252	69	69	137	140	192	192	214	214	145	158	NA	NA
S14_M6a_6_3	M6a	NA	NA	111	128	121	125	183	186	197	197	146	159	NA	NA	NA	NA	196	213	69	69	150	150	NA	NA	142	146	129	129	290	302	157	163	165	168	NA	NA	61	64	138	139	NA	NA	219	219	NA	NA	138	138
S14_M8a_11_1	M8a	NA	NA	111	111	125	125	171	183	217	217	146	157	NA	NA	NA	NA	213	213	NA	NA	152	152	NA	NA	142	142	129	129	302	302	NA	NA	159	165	249	249	61	64	140	142	194	194	214	231	NA	NA	132	138
S14_M8a_13_4	M8a	NA	NA	128	128	125	125	180	180	NA	NA	146	146	NA	NA	NA	NA	141	141	69	69	145	147	232	232	155	155	129	129	290	302	160	160	165	165	NA	NA	61	64	138	140	185	185	214	214	NA	NA	132	132
S14_M8a_35_3	M8a	NA	NA	128	128	121	125	180	186	197	197	146	146	NA	NA	NA	NA	213	223	69	69	NA	NA	NA	NA	139	155	NA	NA	302	302	160	160	NA	NA	243	249	61	64	137	137	185	194	214	219	NA	NA	NA	NA
S14_M8a_8_4	M8a	NA	NA	131	131	125	125	183	183	217	217	146	146	140	140	NA	NA	213	213	69	69	154	154	237	237	142	142	129	129	302	302	163	171	161	168	249	249	61	61	138	140	167	189	214	231	155	157	NA	NA
S14_P2b_31_1	P2b	NA	NA	114	119	129	129	183	183	220	220	159	159	NA	NA	NA	NA	156	156	69	69	164	164	237	239	139	139	129	129	302	302	163	163	165	165	255	255	NA	NA	144	144	167	171	214	214	NA	NA	NA	NA
S14_P5b_12_4	P5b	NA	NA	116	131	121	125	171	186	188	220	146	146	NA	NA	NA	NA	218	218	69	69	147	152	238	238	139	142	NA	NA	290	290	154	154	165	165	243	246	64	64	136	138	167	189	208	214	158	158	NA	NA
S14_P5b_13_1	P5b	NA	NA	119	128	117	121	171	186	188	223	155	159	NA	NA	NA	NA	213	213	69	69	153	162	NA	NA	127	142	129	136	302	302	160	163	159	165	255	255	61	61	NA	NA	167	171	211	214	145	145	NA	NA
S14_P5b_15_3	P5b	NA	NA	128	128	131	131	183	183	223	223	146	146	NA	NA	87	97	199	214	69	69	152	152	236	238	139	139	129	145	290	290	160	160	165	165	240	246	NA	NA	NA	NA	NA	NA	214	219	145	150	NA	NA
S14_P5b_26_2	P5b	NA	NA	116	128	121	121	NA	NA	217	223	146	155	NA	NA	NA	NA	213	223	NA	NA	152	152	238	238	139	142	129	136	290	290	157	163	NA	NA	246	251	61	64	140	140	NA	NA	211	214	NA	NA	132	132
S14_P6b_14_1	P6b	NA	NA	125	128	117	117	186	186	217	217	151	155	129	140	NA	NA	NA	NA	69	69	NA	NA	239	239	127	133	150	150	NA	NA	NA	NA	168	168	249	249	61	64	138	140	NA	NA	219	219	145	155	132	135
S14_P6b_16_3	P6b	NA	NA	128	131	121	125	NA	NA	188	223	155	159	NA	NA	NA	NA	199	199	NA	NA	147	147	239	239	124	133	NA	NA	302	302	163	163	165	165	246	246	61	64	138	140	188	189	214	214	145	155	NA	NA
S14_P3b_13_3	P3b	NA	NA	116	122	125	125	183	183	220	223	155	167	NA	NA	NA	NA	214	219	69	69	147	152	NA	NA	139	142	129	134	290	302	157	163	165	165	245	249	61	64	NA	NA	167	185	214	214	155	155	135	135
S14_P3b_17_4	P3b	NA	NA	116	128	125	129	186	186	220	223	151	155	NA	NA	NA	NA	179	214	69	78	147	160	232	238	142	142	129	129	302	302	157	163	167	167	245	245	61	64	142	142	173	173	214	234	155	155	135	135
C14_P9b_28_4	P9b	NA	NA	131	131	121	121	183	186	217	223	155	155	NA	NA	NA	NA	134	217	69	69	152	172	237	237	142	142	129	129	302	302	157	163	159	165	246	249	61	61	140	140	189	192	214	222	150	155	NA	NA
C14_P1a_13_2	P1a	NA	NA	128	128	121	121	183	183	220	220	155	159	NA	NA	NA	NA	214	214	69	78	152	152	240	240	139	149	129	129	302	302	163	163	174	174	255	255	61	61	NA	NA	189	189	219	219	156	156	NA	NA
C14_P1a_13_4	P1a	NA	NA	128	128	121	121	183	183	220	220	155	159	NA	NA	NA	NA	214	217	69	78	152	152	240	240	136	149	129	129	302	302	157	163	174	174	255	255	61	61	NA	NA	167	189	219	219	NA	NA	NA	NA
C14_M6a_7_4	M6a	NA	NA	111	128	121	121	183	186	220	220	146	167	NA	NA	NA	NA	213	217	69	69	147	152	NA	NA	142	146	129	139	302	302	160	163	161	165	243	255	64	64	138	142	167	194	217	219	155	155	NA	NA
C14_P10a_39_4	P10a	NA	NA	114	114	121	121	177	180	220	223	155	171	NA	NA	NA	NA	214	214	73	73	147	147	236	236	121	136	129	129	302	302	163	166	162	171	243	249	61	61	137	139	171	198	208	208	145	145	NA	NA
C14_M8a_35_3	M8a	NA	NA	111	111	121	125	NA	NA	197	220	146	146	NA	NA	NA	NA	213	223	69	69	168	168	238	238	139	142	129	129	NA	NA	160	160	165	165	249	249	61	61	NA	NA	194	194	219	222	150	150	NA	NA
C14_P5b_15_1	P5b	NA	NA	131	131	125	129	183	183	220	223	146	155	NA	NA	NA	NA	214	220	NA	NA	150	152	236	236	139	142	129	129	290	302	157	160	165	168	240	246	64	64	137	142	167	167	208	226	NA	NA	NA	NA
C14_P6b_26_2	P6b	NA	NA	114	114	121	121	183	183	188	188	155	159	NA	NA	NA	NA	213	218	69	69	145	156	237	240	127	139	129	129	302	302	160	160	165	168	240	249	NA	NA	137	140	167	192	211	214	155	155	NA	NA
C14_P3b_13_4	P3b	NA	NA	116	122	125	125	183	186	188	220	NA	NA	NA	NA	NA	NA	214	214	69	69	NA	NA	239	239	139	142	NA	NA	302	302	157	157	165	171	249	249	61	61	137	142	185	185	214	214	NA	NA	NA	NA
C14_P3b_16_3	P3b	NA	NA	116	131	125	125	183	183	217	217	NA	NA	NA	NA	NA	NA	215	219	69	69	NA	NA	240	240	NA	NA	129	129	302	302	157	160	159	171	243	249	61	64	NA	NA	173	173	219	226	150	150	NA	NA
S14_P9b_18_3	P9b	NA	NA	131	131	121	125	186	186	217	220	NA	NA	NA	NA	NA	NA	173	196	69	69	152	159	NA	NA	139	142	129	129	290	302	157	157	162	165	243	251	61	61	137	137	171	173	219	231	150	155	NA	NA
S14_M7b_11_2	M7b	NA	NA	128	131	125	125	NA	NA	217	217	NA	NA	NA	NA	NA	NA	211	211	69	69	147	152	238	238	NA	NA	129	145	302	302	163	163	165	168	243	243	NA	NA	140	142	189	189	214	219	155	155	NA	NA
S14_P1a_35_4	P1a	NA	NA	128	131	121	129	183	183	220	220	159	159	NA	NA	NA	NA	214	214	69	73	152	152	240	240	136	136	129	129	302	302	157	163	165	165	255	255	61	64	137	137	171	189	219	219	NA	NA	NA	NA
S14_M6a_10_3	M6a	NA	NA	128	128	125	125	171	183	197	220	146	159	NA	NA	NA	NA	217	217	69	69	145	154	NA	NA	142	146	129	129	302	302	160	163	165	168	245	255	61	61	137	137	167	189	219	219	150	158	NA	NA
S14_M6a_5_3	M6a	NA	NA	111	128	121	125	171	183	197	220	155	159	NA	NA	NA	NA	196	196	69	69	150	152	239	242	142	142	129	139	NA	NA	163	163	NA	NA	245	249	64	64	140	140	167	189	208	219	155	155	NA	NA
S14_M8a_38_2	M8a	NA	NA	131	131	125	125	186	186	197	197	146	155	NA	NA	NA	NA	211	213	69	69	152	156	238	238	139	139	129	129	290	290	160	160	165	174	243	243	61	64	140	140	170	185	214	214	157	157	NA	NA
C14_M7b_2_2	M7b	NA	NA	116	125	125	125	183	186	217	217	NA	NA	NA	NA	NA	NA	196	223	69	69	182	182	238	238	142	142	129	129	302	302	163	163	165	171	243	251	61	73	142	142	171	185	217	219	155	158	128	132
C14_P1a_31_3	P1a	NA	NA	128	131	129	129	183	186	220	220	155	159	NA	NA	NA	NA	214	214	69	73	152	152	240	240	136	136	129	129	302	302	157	157	174	174	249	255	NA	NA	137	137	171	189	219	219	156	158	NA	NA
C14_P10a_28_1	P10a	NA	NA	114	114	121	121	177	177	223	223	146	166	137	137	NA	NA	213	213	69	73	147	147	238	238	136	136	129	129	302	302	157	160	162	171	243	243	61	78	137	137	171	189	214	214	145	145	125	132
C14_M8a_11_3	M8a	NA	NA	111	128	125	125	183	186	217	217	146	157	NA	NA	NA	NA	NA	NA	69	69	152	154	233	238	142	142	129	129	302	302	163	163	165	168	243	249	61	64	142	142	192	192	214	231	155	155	132	135
S14_P9b_26_1	P9b	NA	NA	131	131	121	121	183	183	217	217	155	157	NA	NA	NA	NA	134	214	NA	NA	NA	NA	238	238	NA	NA	NA	NA	290	290	157	163	159	165	NA	NA	61	61	137	137	173	189	NA	NA	155	155	NA	NA
S14_P9b_26_4	P9b	NA	NA	128	131	121	121	177	183	217	220	157	159	NA	NA	NA	NA	214	214	69	69	152	159	236	238	NA	NA	129	129	290	302	163	163	165	165	245	249	61	64	137	137	189	189	222	222	155	155	NA	NA
S14_M6a_6_1	M6a	NA	NA	111	128	121	125	183	183	197	220	146	155	NA	NA	NA	NA	196	213	69	69	145	150	NA	NA	142	142	129	129	302	302	163	163	159	165	249	255	64	64	138	139	194	194	219	219	155	155	132	132
S14_P6b_1_1	P6b	NA	NA	128	131	125	129	180	183	189	220	146	151	145	145	NA	NA	NA	NA	69	69	152	172	239	239	142	142	129	139	290	302	160	163	165	168	240	240	64	64	137	137	181	181	211	214	157	157	135	135
S13_P9b_25_2	P9b	NA	NA	NA	NA	121	125	183	183	NA	NA	NA	NA	NA	NA	NA	NA	134	223	69	69	NA	NA	236	238	127	142	NA	NA	290	302	154	160	NA	NA	NA	NA	61	64	137	139	167	192	219	231	145	156	NA	NA
S13_M7b_7_3	M7b	NA	NA	NA	NA	121	125	NA	NA	217	220	NA	NA	NA	NA	NA	NA	213	219	69	69	NA	NA	232	238	138	138	129	150	NA	NA	NA	NA	165	171	NA	NA	61	61	137	142	174	185	NA	NA	155	155	132	132
S13_P5b_22_2	P5b	NA	NA	NA	NA	121	125	183	183	NA	NA	NA	NA	132	132	NA	NA	134	223	69	69	NA	NA	236	236	NA	NA	NA	NA	290	302	154	160	165	165	NA	NA	61	64	137	139	167	192	219	231	NA	NA	132	135
S13_P3b_15_2	P3b	NA	NA	NA	NA	121	125	NA	NA	209	220	156	159	132	132	NA	NA	209	212	69	69	147	147	NA	NA	NA	NA	129	129	290	302	NA	NA	NA	NA	NA	NA	61	64	NA	NA	171	171	214	219	155	155	NA	NA
C13_P9a_11_4	P9a	NA	NA	NA	NA	129	129	183	186	197	217	147	155	137	137	83	87	215	215	69	73	NA	NA	237	237	NA	NA	129	129	290	302	163	163	159	171	240	249	61	61	NA	NA	189	189	214	214	155	155	122	135
S13_M6a_11B_2	M6a	NA	NA	NA	NA	121	125	171	183	197	220	146	146	129	134	87	87	NA	NA	69	69	145	152	235	238	NA	NA	129	139	302	302	NA	NA	165	165	249	265	61	61	138	140	189	194	214	217	NA	NA	132	132
S13_P2b_31_2	P2b	NA	NA	NA	NA	121	129	183	183	220	220	159	159	126	132	97	101	156	214	69	69	145	164	238	238	NA	NA	129	129	302	302	163	163	159	165	240	255	64	64	140	144	171	171	214	214	NA	NA	132	135
C13_P2b_8_1	P2b	NA	NA	NA	NA	125	125	183	183	NA	NA	159	159	126	126	97	97	212	223	69	73	164	164	NA	NA	NA	NA	129	150	290	302	163	163	165	168	NA	NA	61	64	NA	NA	171	171	214	214	157	157	135	135
C13_P5b_22_2	P5b	NA	NA	NA	NA	127	127	177	183	220	220	155	163	132	140	NA	NA	NA	NA	73	73	166	172	232	239	127	142	136	145	290	302	163	163	165	165	240	246	64	64	NA	NA	167	167	219	219	155	155	128	142
C13_P6b_31_4	P6b	NA	NA	NA	NA	122	122	183	186	223	223	159	159	140	140	97	101	NA	NA	NA	NA	NA	NA	239	241	139	142	129	129	302	302	163	174	165	171	NA	NA	NA	NA	NA	NA	NA	NA	219	219	145	145	135	135
C13_P3b_36_1	P3b	NA	NA	NA	NA	122	127	183	183	217	226	152	156	NA	NA	87	97	214	219	69	69	147	160	239	239	NA	NA	129	129	302	302	157	157	165	171	NA	NA	61	61	NA	NA	167	185	234	234	150	155	132	135
C13_P5b_1_3	P5b	NA	NA	NA	NA	121	125	180	186	223	223	146	155	134	137	83	97	214	218	69	78	147	147	236	236	NA	NA	139	145	302	302	174	174	162	168	243	246	64	64	137	140	167	181	211	214	145	150	132	135
C13_P5b_12_1	P5b	NA	NA	NA	NA	125	125	183	186	NA	NA	NA	NA	132	141	80	83	213	213	69	78	152	160	233	238	NA	NA	129	129	290	290	154	154	165	168	246	246	61	61	136	138	167	167	208	214	145	158	132	135
C13_P6b_21_3	P6b	NA	NA	NA	NA	121	129	183	183	212	220	NA	NA	129	134	83	101	213	213	69	73	147	166	NA	NA	142	142	136	136	302	302	160	163	159	168	NA	NA	69	69	137	140	181	181	211	214	145	145	NA	NA
C13_M7b_7_4	M7b	NA	NA	NA	NA	125	125	186	186	217	217	NA	NA	131	144	86	86	211	219	69	69	152	182	232	238	142	142	129	129	302	302	NA	NA	165	168	243	255	61	61	NA	NA	167	185	NA	NA	155	158	135	135
C13_M6a_11_4	M6a	NA	NA	NA	NA	125	125	171	171	197	220	146	146	129	129	87	97	196	196	69	69	152	168	235	238	NA	NA	129	129	302	302	163	163	165	165	249	249	64	64	140	142	167	194	217	226	150	155	132	132
C13_P10a_9_4	P10a	NA	NA	NA	NA	121	121	NA	NA	197	197	146	159	129	137	87	87	214	214	69	73	145	147	236	236	142	142	129	129	302	302	160	163	165	165	243	249	61	61	137	142	171	171	214	214	145	150	125	132
C13_M7b_22_1	M7b	NA	NA	NA	NA	125	125	174	183	NA	NA	146	151	140	140	NA	NA	213	213	69	69	147	152	238	238	139	139	129	129	302	302	NA	NA	NA	NA	243	249	61	61	138	142	185	189	214	214	155	155	135	135
C13_P5b_1_1	P5b	NA	NA	NA	NA	121	125	171	186	188	220	NA	NA	137	140	NA	NA	218	218	69	69	145	147	239	241	NA	NA	145	150	302	302	163	163	NA	NA	243	246	61	61	NA	NA	167	192	NA	NA	145	150	135	135
C13_P5b_12_3	P5b	NA	NA	NA	NA	121	125	NA	NA	188	220	146	155	140	146	80	83	218	218	78	78	147	152	NA	NA	139	139	136	136	290	302	154	160	165	165	243	246	64	64	136	138	167	189	NA	NA	145	158	132	132
C13_P5b_32_1	P5b	NA	NA	NA	NA	125	129	183	183	188	220	NA	NA	140	140	87	97	214	214	69	69	152	160	238	238	142	142	129	145	290	302	NA	NA	165	165	246	249	61	61	NA	NA	171	171	NA	NA	150	150	122	142
C14_P9a_38_4	P9a	NA	NA	NA	NA	129	129	183	186	220	220	155	163	NA	NA	NA	NA	NA	NA	73	73	150	150	NA	NA	139	142	129	129	302	302	148	157	165	171	249	249	61	76	137	140	192	192	222	222	NA	NA	NA	NA
C14_M6a_8_3	M6a	NA	NA	NA	NA	121	125	NA	NA	209	220	146	167	NA	NA	NA	NA	196	217	69	69	150	152	235	237	133	139	139	139	290	302	163	163	168	168	240	245	69	69	138	140	194	194	217	219	155	155	NA	NA
C14_P3b_28_1	P3b	NA	NA	NA	NA	121	121	186	186	197	217	NA	NA	NA	NA	NA	NA	220	220	73	73	NA	NA	236	238	NA	NA	129	129	302	302	163	163	174	174	240	240	61	64	137	141	192	192	214	214	NA	NA	NA	NA
S14_P1a_31_3	P1a	NA	NA	NA	NA	121	129	183	183	220	220	155	159	NA	NA	NA	NA	214	214	69	73	152	152	NA	NA	136	136	129	150	302	302	157	163	174	174	255	255	NA	NA	137	137	189	189	219	219	156	156	NA	NA
S14_P9a_40_2	P9a	NA	NA	NA	NA	121	121	183	183	215	217	146	167	NA	NA	NA	NA	153	220	73	73	150	160	238	238	139	142	129	129	302	302	163	163	NA	NA	240	249	61	61	137	140	167	167	214	214	NA	NA	NA	NA
S14_P10a_39_2	P10a	NA	NA	NA	NA	121	121	177	177	NA	NA	NA	NA	NA	NA	87	97	214	214	69	73	147	152	236	236	NA	NA	129	129	302	302	160	163	162	162	243	252	61	64	137	137	171	198	219	222	NA	NA	NA	NA
S14_P6b_8_2	P6b	NA	NA	NA	NA	117	121	174	183	189	189	146	159	NA	NA	NA	NA	223	223	69	78	152	176	232	237	139	139	NA	NA	302	302	148	148	165	165	240	246	61	61	NA	NA	167	181	208	214	NA	NA	NA	NA
S14_P6b_8_4	P6b	NA	NA	NA	NA	117	125	183	183	188	220	146	159	NA	NA	NA	NA	220	223	69	78	152	160	237	240	139	139	129	129	302	302	148	160	165	165	NA	NA	61	61	NA	NA	181	181	208	217	145	155	NA	NA
C14_P9b_13_2	P9b	NA	NA	NA	NA	121	121	186	186	209	217	NA	NA	146	146	82	87	NA	NA	69	69	150	152	236	236	139	142	129	129	290	302	163	171	159	174	NA	NA	61	64	137	140	171	210	NA	NA	155	155	135	135
C14_P9b_18_2	P9b	NA	NA	NA	NA	125	125	186	186	217	220	155	159	NA	NA	NA	NA	196	196	69	69	159	159	NA	NA	142	142	129	129	290	290	157	163	162	174	243	251	61	61	137	137	171	173	231	231	150	150	132	132
C14_P10a_25_3	P10a	NA	NA	NA	NA	121	121	177	177	223	223	155	159	144	144	NA	NA	214	214	69	73	147	147	236	236	136	136	129	129	302	302	160	166	162	162	243	255	NA	NA	137	142	198	210	208	219	145	145	132	135
C14_P5b_5_1	P5b	NA	NA	NA	NA	121	129	NA	NA	217	217	146	146	NA	NA	NA	NA	213	223	69	69	152	152	235	238	139	142	129	136	290	302	157	163	159	165	249	251	61	61	140	140	167	167	211	214	150	150	128	132
S14_M7b_6_2	M7b	NA	NA	NA	NA	125	125	171	183	217	217	146	155	131	136	NA	NA	150	196	69	69	182	182	238	238	121	142	129	129	302	302	160	171	165	168	243	243	61	73	137	142	185	185	214	217	155	157	NA	NA
S14_P10a_37_2	P10a	NA	NA	NA	NA	121	121	180	183	223	223	NA	NA	NA	NA	NA	NA	214	214	69	73	147	152	236	236	139	142	129	129	302	302	NA	NA	162	174	249	249	NA	NA	137	142	189	210	219	222	145	145	132	132
S14_M8a_11_2	M8a	NA	NA	NA	NA	121	121	183	186	217	220	146	157	137	146	NA	NA	NA	NA	69	69	152	154	233	243	NA	NA	129	129	302	302	163	163	168	168	243	249	61	64	140	142	189	192	214	214	155	157	132	138
S14_P5b_26_1	P5b	NA	NA	NA	NA	121	121	183	183	220	220	159	159	NA	NA	NA	NA	214	214	69	69	150	152	238	238	139	139	129	129	302	302	NA	NA	165	165	246	255	61	61	138	140	167	167	214	219	158	158	NA	NA
S14_P3b_14_2	P3b	NA	NA	NA	NA	125	125	183	183	217	220	NA	NA	NA	NA	NA	NA	209	209	69	69	160	160	238	238	142	142	129	129	302	302	157	163	171	171	249	249	61	61	138	142	167	167	208	234	155	155	NA	NA
S14_P3b_36_2	P3b	NA	NA	NA	NA	125	125	183	186	217	220	NA	NA	NA	NA	87	97	134	214	NA	NA	147	152	240	240	139	142	129	129	302	302	163	163	165	168	245	249	NA	NA	NA	NA	167	167	214	234	150	155	132	135
C13_P1a_12_3	P1a	NA	NA	NA	NA	NA	NA	183	186	220	220	NA	NA	129	129	87	87	214	214	69	69	152	152	237	237	136	136	129	129	302	302	160	163	165	168	252	255	NA	NA	137	137	189	189	219	219	NA	NA	122	128
[truncated: 29 more columns]
